# Supplementary material for: Protocol for establishing an Adaptive Diseases control Expert Programme in Tanzania (ADEPT) for integrating care of communicable and non-communicable diseases using tuberculosis and diabetes as a case study
Source: PubMed Central journal article supplement — BMJ Open. 2021 Apr 28;11(4):e041521. doi: 10.1136/bmjopen-2020-041521 (PMC8094344; doi:10.1136/bmjopen-2020-041521), 2021-04-28
Supplement: bmjopen-2020-041521.draft_revisions.pdf [file bmjopen-2020-041521.draft_revisions.pdf]

# BMJ Open

BMJ Open is committed to open peer review. As part of this commitment we make the peer review history of every article we publish publicly available.

When an article is published we post the peer reviewers' comments and the authors' responses online. We also post the versions of the paper that were used during peer review. These are the versions that the peer review comments apply to.

The versions of the paper that follow are the versions that were submitted during the peer review process. They are not the versions of record or the final published versions. They should not be cited or distributed as the published version of this manuscript.

BMJ Open is an open access journal and the full, final, typeset and author-corrected version of record of the manuscript is available on our site with no access controls, subscription charges or pay-per-view fees (<http://bmjopen.bmj.com>).

If you have any questions on BMJ Open's open peer review process please email [info.bmjopen@bmj.com](mailto:info.bmjopen@bmj.com)

# BMJ Open

**Protocol for establishing an Adaptive Diseases control Expert Programme in Tanzania (ADEPT) for integrating care of communicable and non-communicable diseases using tuberculosis and diabetes as a case study.**

|                               |                                                                                                                                                                                                                                                                                                                                                                                                                                                                                                                                                                                                                                             |
|-------------------------------|---------------------------------------------------------------------------------------------------------------------------------------------------------------------------------------------------------------------------------------------------------------------------------------------------------------------------------------------------------------------------------------------------------------------------------------------------------------------------------------------------------------------------------------------------------------------------------------------------------------------------------------------|
| Journal:                      | <i>BMJ Open</i>                                                                                                                                                                                                                                                                                                                                                                                                                                                                                                                                                                                                                             |
| Manuscript ID                 | bmjopen-2020-041521                                                                                                                                                                                                                                                                                                                                                                                                                                                                                                                                                                                                                         |
| Article Type:                 | Protocol                                                                                                                                                                                                                                                                                                                                                                                                                                                                                                                                                                                                                                    |
| Date Submitted by the Author: | 12-Jun-2020                                                                                                                                                                                                                                                                                                                                                                                                                                                                                                                                                                                                                                 |
| Complete List of Authors:     | Mpagama, Stella; Kibong'oto Infectious Diseases Hospital, Medical Ramaiya, Kaushik; Shree Hindu Mandal Hospital Lillebæk, Troels ; Statens Serum Institut, mmbaga, blandina Sumari-de Boer, Marion; Kilimanjaro Clinical Research Institute Ntinginya, Nyanda; 6. National Institute of Medical Research-Mbeya Medical Research Centre Alffenaar, Jan-Willem; Rijksuniversiteit Groningen, Heysell, Scott; University of Virginia, Division of Infectious Diseases and International Health Bygbjerg, Ib; University of Copenhagen, 1Department for International Health, Immunology and Microbiology Christensen, Dirk L.; Univ Copenhagen |
| Keywords:                     | Tuberculosis < INFECTIOUS DISEASES, Public health < INFECTIOUS DISEASES, Diabetes & endocrinology < INTERNAL MEDICINE                                                                                                                                                                                                                                                                                                                                                                                                                                                                                                                       |
|                               |                                                                                                                                                                                                                                                                                                                                                                                                                                                                                                                                                                                                                                             |

SCHOLARONE™  
Manuscripts

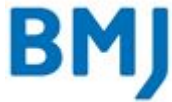

I, the Submitting Author has the right to grant and does grant on behalf of all authors of the Work (as defined in the below author licence), an exclusive licence and/or a non-exclusive licence for contributions from authors who are: i) UK Crown employees; ii) where BMJ has agreed a CC-BY licence shall apply, and/or iii) in accordance with the terms applicable for US Federal Government officers or employees acting as part of their official duties; on a worldwide, perpetual, irrevocable, royalty-free basis to BMJ Publishing Group Ltd ("BMJ") its licensees and where the relevant Journal is co-owned by BMJ to the co-owners of the Journal, to publish the Work in this journal and any other BMJ products and to exploit all rights, as set out in our [licence](#).

The Submitting Author accepts and understands that any supply made under these terms is made by BMJ to the Submitting Author unless you are acting as an employee on behalf of your employer or a postgraduate student of an affiliated institution which is paying any applicable article publishing charge ("APC") for Open Access articles. Where the Submitting Author wishes to make the Work available on an Open Access basis (and intends to pay the relevant APC), the terms of reuse of such Open Access shall be governed by a Creative Commons licence – details of these licences and which [Creative Commons](#) licence will apply to this Work are set out in our licence referred to above.

Other than as permitted in any relevant BMJ Author's Self Archiving Policies, I confirm this Work has not been accepted for publication elsewhere, is not being considered for publication elsewhere and does not duplicate material already published. I confirm all authors consent to publication of this Work and authorise the granting of this licence.

**TITLE:** Protocol for establishing an Adaptive Diseases control Expert Programme in Tanzania (ADEPT) for integrating care of communicable and non-communicable diseases using tuberculosis and diabetes as a case study.

**AUTHORS:** Stellah G Mpagama<sup>1, 2</sup>, Kaushik Ramaiya<sup>3</sup>, Troels Lillebaek<sup>4,12</sup>, Blandina T Mmbaga<sup>2,5</sup>, Marion Sumari-de Boer<sup>5</sup>, Nyanda Elias Ntinginya<sup>6</sup>, Jan-Willem Alffenaar<sup>7,8,9,10</sup>, Scott Heysell<sup>11</sup>, Ib Christian Bygbjerg<sup>12</sup>, Dirk Lund Christensen<sup>12</sup>

1. Kibong'oto Infectious Diseases Hospital, Mae Street, Lomakaa Road -Siha, Kilimanjaro
2. Kilimanjaro Christian Medical College, Sokoine Street, Moshi, Tanzania.
3. Department of internal medicine, Hindu Mandal Hospital, Dar es Salaam, Tanzania.
4. Statens Serum Institut (SSI), Copenhagen. Denmark
5. Kilimanjaro Clinical Research Institute (KCRI), PO Box 2236, Moshi, Tanzania
6. National Institute of Medical Research-Mbeya Medical Research Centre, Hospital Hill Road, Mbeya, Tanzania
7. University of Groningen, University Medical Center Groningen, Department of Clinical Pharmacy and Pharmacology, Groningen,
8. University of Sydney, Faculty of Medicine and Health, School of Pharmacy, Sydney, Australia
9. Westmead Hospital, Sydney, Australia
10. Marie Bashir Institute of Infectious Diseases and Biosecurity, University of Sydney, Sydney, Australia
11. University of Virginia, Division of Infectious Diseases and International Health, Charlottesville, Virginia, U.S.A

12. Section of Global Health, Department of Public Health, University of Copenhagen,  
Copenhagen, Denmark

Stellah G Mpagama: smpagama@kidh.go.tz

Kaushik Ramaiya: ceo@hc.shm.or.tz

Troels Lillebaek: tll@ssi.dk

Blandina T Mmbaga: b.mmbaga@kcri.ac.tz

Marion Sumari-de Boer: m.sumari@kcri.ac.tz

Nyanda Elias Ntinginya: nelias@nimr-mmrc.org

Jan-Willem Alffenaar: johannes.alfenaar@sydney.edu.au

Scott Heysell: skh8r@hscmail.mcc.virginia.edu

Ib Christian Bygbjerg: iby@sund.ku.dk

Dirk Lund Christensen: dirklc@sund.ku.dk

### Corresponding Author

Stellah G. Mpagama

Kibong'oto Infectious Diseases Hospital

Mae Street, Lomakaa road

Siha Kilimanjaro

Tanzania

[sempagama@yahoo.com](mailto:sempagama@yahoo.com)

255754860576

### Keywords

Adaptive diseases intervention programme, Communicable and non-communicable dual epidemics, tuberculosis and diabetes dual epidemic, health systems, implementation methods

**Main manuscript words count = 3856**

1  
2 55 **ABSTRACT**  
3

4 56 **Introduction:** Most sub-Saharan African countries endure a high burden of communicable  
5  
6 57 diseases but also face a simultaneous rise of non-communicable illnesses. Interventions  
7  
8  
9 58 targeting particular epidemics are often executed within vertical programmes. We aim to  
10  
11 59 develop a model that will strengthen health systems by shifting traditional vertical programmes  
12  
13  
14 60 to an adaptive diseases control approach through integrating communicable and non-  
15  
16 61 communicable diseases diagnosis and management using the tuberculosis (TB) and diabetes  
17  
18  
19 62 mellitus (DM) dual epidemic as a case study.  
20

21 63 **Methods and analysis:** This programme will use a mixed research design, with both qualitative  
22  
23  
24 64 and quantitative approaches. A prospective cohort design will be used in assessing integration  
25  
26 65 of TB and DM services that will enable early diagnosis of dual TB/DM cases. Lastly, a stepped-  
27  
28  
29 66 wedge cluster randomized trial will assess the impact of introducing individualized TB/DM  
30  
31 67 practices at the health care facility level. A blueprint for addressing communicable and non-  
32  
33 68 communicable dual epidemics will be developed using several tools and techniques such as a  
34  
35  
36 69 collection of stakeholders' views and literature reviews, monitoring of key indicators in the  
37  
38 70 TB/DM case study, and applying a system thinking approach to essential elements in the health  
39  
40  
41 71 service delivery.  
42

43 72 **Ethics and Dissemination:** Ethical approval was granted by The National Research Health Ethical  
44  
45  
46 73 Committee with reference number NIMR/HQ/R.8a/Vol.IX/2988 and the implementation was  
47  
48 74 endorsed by the President Office Regional Administration and Local Government Authority. The  
49  
50  
51 75 results will be proactively disseminated through peer-reviewed open access journals, policy  
52  
53 76 briefs, various stakeholders, public engagement activities, conference presentations, and social  
54  
55 77 media.  
56  
57  
58 78  
59  
60 79

1  
2 80  
3  
4 81  
5  
6 82  
7  
8  
9 83  
10  
11 84  
12  
13  
14 85  
15  
16 86  
17  
18  
19 87  
20  
21 88  
22  
23  
24 89  
25  
26 90  
27  
28  
29 91  
30  
31 92  
32  
33  
34 93  
35  
36 94  
37  
38 95  
39  
40  
41 96  
42  
43 97  
44  
45  
46 98  
47  
48 99  
49  
50  
51 100  
52  
53 101  
54  
55  
56 102  
57  
58 103  
59  
60 104

## ARTICLE SUMMARY

### Strengths and limitations of this study

- The study is conducted in pragmatic settings using a mixed study design to allow triangulation
- Considers all levels of service delivery while covering urban, semi-urban and rural settings
- The proposed ADEPT model outcome considers process and patient outcomes
- Lack of randomization of study settings or health facilities may introduce bias

## INTRODUCTION

Tanzania like other sub-Saharan African countries endures a high burden of communicable diseases including multidrug resistant pathogens; but also a concurrent rise of non-communicable diseases (NCD) as populations urbanize, diets “westernize” and lifespans lengthen<sup>1</sup>. The health system is largely inflexible and during various period of disease epidemics, the health management teams operate in crisis-mode with limited capacity to plan for a long-term disease prevention<sup>2</sup>. Currently in Tanzania, planned interventions for several longstanding and socioeconomically draining epidemics like tuberculosis (TB) and diabetes mellitus (DM) and their associated comorbidities, are executed within disease specific or vertical programmes<sup>3</sup>. Vertical programmes operate in silos while in reality various communicable and NCDs and treatments can influence one another, and overlap in<sup>4-7</sup> populations of shared genetic backgrounds or environmental exposures, and in communities with similar socioeconomic conditions or behaviours. Vertical programmes can significantly constrain health care delivery, and represent a top-down approach that is rarely efficient or cost-effective, particularly when considering health challenges<sup>8</sup>.

This sobering fact has been illuminated in different vertical programmes. In Tanzania, compendium of research studies uncovered a health systems gridlock for patients trying to

1  
2 105 negotiate the road from diagnosis to treatment of TB<sup>4,7</sup>. There was a widespread underuse of  
3  
4 106 the technologies mostly due to inadequate knowledge and skills on clinical application and  
5  
6 107 interpretation of molecular diagnostics results. Likewise, there was not only a low response to  
7  
8  
9 108 the international consensus but also absence of linkage to care for patients presenting with TB  
10  
11 109 but failing to be screened for DM and triaged to adequate DM services <sup>9</sup>. Similarly, in Tanzania  
12  
13  
14 110 DM services are centralized at the district and referral health facilities but also front-line health  
15  
16 111 care providers were ill-prepared for DM management. Research studies conducted in different  
17  
18  
19 112 programmes to identify multimorbidity particularly the NCD have found a considerable client  
20  
21 113 harbouring the burden of multiple diseases. The observed increasing prevalence of dual  
22  
23  
24 114 communicable and emerging non-communicable multimorbidity epidemics and the existing  
25  
26 115 systemic bottlenecks suggest modification of models of health care delivery. We developed a  
27  
28  
29 116 model to strengthen health systems by shifting traditional vertical programmes to an adaptive  
30  
31 117 diseases control approach through integrating communicable and NCDs. Henceforth, we  
32  
33  
34 118 describe the strategy to establish a contemporary **Adaptive Diseases control Expert Programme**  
35  
36 119 in Tanzania (Figure 1) (**ADEPT**), focusing on the TB/DM co-epidemic.

37  
38 120 The dual TB and DM epidemic is ideal as a case for our ADEPT model because worldwide evidence  
39  
40  
41 121 shows a 3-fold increase of active TB in populations with DM compared to those without DM while  
42  
43 122 the global prevalence of TB in DM populations ranges from 1% -14%<sup>10,11</sup>. In Tanzania, the effect was  
44  
45  
46 123 slightly higher and estimated at nearly 4-fold<sup>12</sup>. Indeed, stakeholders from The International  
47  
48 124 Union Against Tuberculosis and Lung Disease and the World Diabetes Foundation outlined the  
49  
50  
51 125 historic Bali Initiative on TB and DM (endorsed by World Health Organization (WHO)), stating:  
52  
53 126 “▪That TB and DM represent two of the greatest global health challenges of our time, and their  
54  
55 127 convergence globally represents a looming co-epidemic,  
56  
57  
58 128 ▪That this looming co-epidemic threatens progress against TB,  
59  
60 129 ▪That, based on what we have learned from past co-epidemics, particularly TB-HIV, we must act



1  
2 130 early and decisively to avoid large numbers of avoidable deaths”<sup>13 14</sup>.  
3  
4 131 We understand this urgency all too well in Tanzania. Recently, we have observed an increase in  
5  
6  
7 132 the incidence of dual diagnosed patients with TB/DM epidemic ranging from 4% of all TB patients  
8  
9 133 in rural areas to 17% in urban settings, resulting in a 5-fold increase of death compared to TB  
10  
11  
12 134 patients without DM<sup>15 16</sup>. Importantly, our research has determined that these deaths primarily  
13  
14 135 occur *early*, in the first three months of TB treatment<sup>15 16</sup>. We now understand that this high and  
15  
16 136 early mortality from TB/DM in Tanzania is due to both programmatic and biological factors<sup>17</sup>. For  
17  
18  
19 137 example, TB and DM services are not linked and these separated service lines lead to delayed  
20  
21 138 interventions for both diseases<sup>18</sup>. Interestingly, targeted drug therapy of dual TB/DM disease  
22  
23  
24 139 may also open new ways of enhancing the effect of essential drugs against either disease<sup>19</sup>. Thus,  
25  
26 140 data have suggested that the first-line anti-DM drug metformin could be a promising candidate  
27  
28  
29 141 for host-adjunctive anti-TB therapy, by reducing chronic inflammation and enhancing immune  
30  
31 142 response<sup>20</sup>.  
32  
33  
34 143 Yet, other biological factors also contribute to poor TB/DM treatment outcomes including DM-  
35  
36 144 related alterations in drug absorption and metabolism resulting in sub-therapeutic anti-TB drug  
37  
38 145 serum concentrations,<sup>21</sup> and altered inflammatory/anti-inflammatory host immune defences.  
39  
40  
41 146 Furthermore, TB disease itself may worsen control of hyperglycaemia leading to uncontrolled  
42  
43 147 DM<sup>22</sup>. In turn, patients with uncontrolled DM also have higher bacterial burdens of *M.*  
44  
45  
46 148 *tuberculosis* and more extensive lung disease, and therefore achieving anti-TB drug  
47  
48 149 concentrations at the most optimal of levels may be even more important in patients with DM<sup>23</sup>  
49  
50  
51 150<sup>24</sup>. Yet, in our prior work in Tanzania, we found sub-therapeutic drug concentrations to occur in  
52  
53 151 the majority of all TB patients<sup>25 26</sup>. While international standards mention therapeutic drug  
54  
55 152 monitoring to guide TB/DM individualized dose adjustment<sup>27</sup>, few programmes from TB-endemic  
56  
57  
58 153 settings have carried these recommendations forward<sup>28</sup>. Although the Tanzania Ministry of  
59  
60 154 Health recognizes the challenge of the TB/DM epidemic, the vast majority of health facilities have

1  
2 155 not been able to implement international standards of TB/DM care. Therefore, this research  
3  
4 156 project will also take the opportunity to underpin implementation of the international standards  
5  
6 157 for controlling the TB/DM in the health system and conduct applied research to answer critical  
7  
8  
9 158 scientific questions of direct patient benefit while simultaneously training the next generation  
10  
11  
12 159 of health systems scientists.

13  
14 160 The overall study aim is to integrate TB/DM diagnosis and optimal management strategies in  
15  
16 161 client-friendly clinics as part of an adaptive disease control framework to inform future best  
17  
18  
19 162 policies for integrating care of communicable and NCDs in Tanzania. The objectives are given  
20  
21 163 below, and have been divided into the following;

22  
23  
24  
25 164 I. Objective 1. Integrate TB, and DM services.

26  
27  
28 165 To study how early and accurate bidirectional screening of TB, including TB-HIV, and DM can be  
29  
30  
31 166 established in a client-friendly way while investigating how early and accurate treatment of dual  
32  
33 167 TB/DM or TB-HIV/DM cases can be linked to specialized care and improve outcomes, and if  
34  
35  
36 168 feasible to sustain treatment at the primary health care level. Furthermore, investigation on how  
37  
38 169 quality assurance for the laboratories serving TB/DM at the primary health care level can be  
39  
40  
41 170 established.

42  
43  
44 171 II. Objective 2. Deliver international standards of care for optimizing favourable outcomes.  
45  
46  
47  
48  
49  
50  
51  
52  
53  
54  
55  
56  
57  
58  
59  
60

1  
2 172 To study how to apply diagnostic technologies such as WHO endorsed TB diagnostics for  
3  
4 173 susceptibility testing, therapeutic drug monitoring for anti-TB medicine and HbA1c for  
5  
6  
7 174 monitoring of DM disease severity to deliver best practice for optimizing favourable dual  
8  
9 175 TB/DM treatment outcomes Furthermore, to estimate the incidence and associated risk  
10  
11  
12 176 factors for treatment failure during dual TB/DM treatment, including the development of *M.*  
13  
14 177 *tuberculosis* resistance, and whether the hypoglycaemic drug, metformin may have an  
15  
16 178 adjunctive anti-TB effect.

- 18  
19  
20 179 III. Objective 3; Capacity building for training ADEPT health care workers and implementation  
21  
22 180 & health system scientists

23  
24  
25 181 To study how short-course training to the front-line health care providers in best  
26  
27  
28 182 practices for dual TB/DM and other comorbidities at varying health system levels can  
29  
30  
31 183 be provided and be reflected in outcome of WP-1 and WP-2.

## 32 33 184 **METHODS AND ANALYSIS**

### 34 35 36 185 **Conceptual framework of the ADEPT model**

37  
38 186 The ADEPT model pioneers the systems thinking methodology described by Swanson and  
39  
40  
41 187 colleagues to guide integrative changes in health practice, education, research and policy <sup>29</sup>.

42  
43 188 We proposed to introduce ADEPT first to the dual TB and DM epidemic as a case study of  
44  
45  
46 189 integrating communicable (TB) and non-communicable (DM) diseases <sup>30 31</sup> to engage currently  
47  
48 190 siloed policy makers, researchers, and service providers <sup>32</sup>. The proposed ADEPT model is  
49  
50  
51 191 overarching by three principles with interdependent themes; transformational leadership,  
52  
53 192 collaboration, and constant interactive learning. ADEPT will be evaluated using the logic  
54  
55 193 framework developed by the WHO/US-Centre for Diseases Control and Prevention (US-CDC)  
56  
57  
58 194 (Figure 2) <sup>33</sup>. The design of input and output pillars reflect largely on the archetypical work  
59  
60

1  
2 195 designed by Potters and Brought in 2004 for health system strengthening<sup>34</sup>. This includes a four-  
3  
4 196 tier hierarchy with nine-interdependent elements as depicted in Figure 3.

5  
6  
7 197 **Role, Structural and System capacity:** ADEPT will mobilize physicians and nurse officers working  
8  
9 198 at TB, DM, or general clinics at the regional level regardless of facility level. The team will serve  
10  
11 199 as a Regional Technical Working Group (RTWG), and will be empowered to serve as mentors in  
12  
13  
14 200 the Region to support the health system to deliver best practices in patients with dual  
15  
16 201 communicable and NCDs. The formed team will operate under the Regional Medical Officer  
17  
18  
19 202 (RMO), a newly formed structure that will also link with the National Technical Working Groups  
20  
21 203 (NTWG) (Figure 1). RTWG under the leadership of RMO will conduct regular discussion with all  
22  
23  
24 204 stakeholders supporting the communicable and or NCDs intervention and associated co-  
25  
26 205 morbidities. The discussion emanating from the meetings will guide local decision but also  
27  
28  
29 206 communicated to the Ministries; responsible for Health and Regional Administration and Local  
30  
31 207 Government Authorities, and shared with responsible NTWG for prioritization (Figure 1).  
32  
33  
34 208 The ADEPT consortium will meticulously and continuously explore gaps that will progressively  
35  
36 209 evolve the system toward people-centred health system<sup>35</sup>.

37  
38 210 **Staff and Personnel Training:** ADEPT has collaborated with National Training Centres and  
39  
40  
41 211 hospitals/facilities that provide advanced/specialized care of patients in creating modules for  
42  
43 212 training of the front-line healthcare providers (HCPs). Leadership and supervisory lines will be  
44  
45  
46 213 strengthened simultaneously with increasing accountability and establishment of a clinical  
47  
48 214 audit programme. ADEPT has also created local technical working groups composed of senior  
49  
50  
51 215 front-line HCPs currently empowered with skills and knowledge for integrating and clinical  
52  
53 216 management of communicable (TB) and non-communicable (DM) diseases<sup>36</sup>. The  
54  
55 217 empowerment of HPCs has been facilitated by those training modules delivered as web-based  
56  
57  
58 218 or m-Health platforms for continuous professional development that has increased the reach  
59  
60 219 to all HCPs that would otherwise not be possible due to limited funds. The designed modules

1  
2 220 are not only adaptive to cover HCPs with different skills (for example, clinicians and nurses) but  
3  
4 221 modules can be updated remotely should new processes need to be introduced. Importantly,  
5  
6 222 the HCPs have endless access and updated alerts to their mobile numbers or emails prompting  
7  
8  
9 223 them to complete a new module.

10  
11 224 **Tools:** Equipment and consumables for piloting the programme have been inventoried at  
12  
13  
14 225 participating facilities within the communities of study. Supplies for DM were frequently not  
15  
16 226 available or inadequately stocked and these including glucometers, glucostrips, HbA1c devices,  
17  
18  
19 227 therapeutic drug monitoring supplies, recording and reporting. These tools were funded  
20  
21 228 temporarily through the Danish International Development Agency. TB consumables, supplies  
22  
23  
24 229 and tools were procured through conventional channels.

### 25 26 230 **Study design**

27  
28  
29 231 This is a mixed research design; and applies both qualitative and quantitative approaches. Cross  
30  
31 232 sectional design will be conducted for needs assessment and bidirectional screening while,  
32  
33  
34 233 prospective cohort designs will be deployed for and stepped wedged cluster non-randomized  
35  
36 234 trial will be used in different work packages.

### 37 38 235 **Study area**

39  
40  
41 236 The research project will be conducted in three regions of Tanzania; Dar es Salaam, Iringa, and  
42  
43 237 Kilimanjaro. Districts that will participate include Ilala and Kigamboni for Dar es Salaam, Iringa  
44  
45  
46 238 Municipal, Kilolo and Mufindi for Iringa, and Moshi Municipal, Same and Siha for Kilimanjaro.

### 47 48 239 **Study outline**

#### 49 50 51 240 **Objective 1 method: Integrate TB or TB/HIV and DM services**

52  
53 241 A prospective observational of the health system study will be conducted. It is recommended  
54  
55 242 that at least 30 health facilities are needed for reliable and accurate results therefore each region  
56  
57  
58 243 will contribute at least 10 health facilities at various levels for integrating TB or TB/HIV and DM  
59  
60 244 services<sup>37</sup>. The catchment area includes one- referral hospital, three district hospitals and at least

1  
2 245 6 health centres/dispensaries. Integration will start stepwise from the referral (secondary or  
3  
4 246 tertiary) hospitals levels towards primary health care clinics, i.e. the district hospitals followed  
5  
6  
7 247 by the health centres and dispensaries. Needs assessments have been carried to identify capacity  
8  
9 248 of the health facility and decide whether the health facility will operate as a “one-stop shop”  
10  
11  
12 249 defined as TB and DM services provided at the same time using adjacent rooms, “partial  
13  
14 250 integration” defined as health care providers swaps between clinics, or “remote integration”  
15  
16 251 through cross referral of DM to TB services. Entries of TB/DM integration in TB services or TB/HIV  
17  
18  
19 252 services will be at the TB and DM clinics<sup>38</sup>. TB diagnosed cases will receive DM testing while at  
20  
21 253 the DM clinics, presumed TB will be screened according to the standard national TB algorithm.  
22  
23  
24 254 An algorithm to identify cases with high potential for treatment failure including those with TB  
25  
26 255 drug resistance and other DM co-morbidities will be identified and tabled for expert discussion.  
27  
28  
29 256 Participants will be managed according to the collaborative TB/DM services framework guideline  
30  
31 257 <sup>39</sup> as follows;

#### 34 258 **Sub-objective 1.1. Method. Screening TB in DM patients**

36  
37 259 DM cases especially those with sub-optimal control as defined by HbA<sub>1c</sub>, will be screened for  
38  
39 260 active TB. The algorithms for active TB case findings will be applied as described elsewhere<sup>40 41</sup>.

#### 42 261 **Sub-objective 1.2. Method. Screening DM in TB patients**

44  
45 262 All TB cases irrespective of having “classical” symptoms (polyuria, polydipsia and polyphagia),  
46  
47 263 cases will be screened with glucometer and Interpretation of results is as follows; if the random  
48  
49  
50 264 blood/serum glucose (RBG)  $\leq$  7.8 mmol/L or fasting blood glucose (FBG)  $\leq$  6.1 mmol/L without  
51  
52 265 DM symptoms, blood or serum glucose will be considered normal. If the RBG is 7.8 – 11.0 mmol/L  
53  
54  
55 266 or FBG is 6.2 – 6.9 mmol/L, this will be considered as pre-DM. When RBG is  $\geq$  11mmol/L or FBG is  
56  
57 267  $\geq$  7.0 mmol/L this is DM. To exclude patients with transient hyperglycaemia due to cytokine  
58  
59  
60 268 stimulation (false DM diagnosis), Hb<sub>1c</sub> is used to confirm the diagnosis of DM in TB cases <sup>22</sup>.

1  
2 269 Individuals with pre-DM or DM will further be tested with HbA1c, and the interpretation of the  
3  
4 270 results are as follows; HbA1c of  $\leq 38$  mmol/mol ( $\leq 5.6\%$ );  $39 < 48$  mmol/mol ( $5.7\% < 6.5\%$ ), and  $\geq 48$   
5  
6 271 mmol/mol ( $\geq 6.5\%$ ) will be reported and considered as normal, pre-DM and DM respectively<sup>42</sup>. TB  
7  
8  
9 272 cases with pre-DM will be re-evaluated in the mid-term of TB treatment and TB treatment  
10  
11 273 completion to identify if the condition has resolved, or progressed or remained static; if pre-DM  
12  
13  
14 274 will have advanced to DM, patients will be treatment according to the DM guideline. The TB IPC  
15  
16 275 practice that is applicable in HIV clinics will be applied<sup>38</sup>.

18  
19 276 **Objective 2 methods: Deliver International Standards using diagnostics for optimizing**  
20  
21 277 **outcomes**

22  
23  
24 278 Health facilities effectively integrating dual TB/DM services will enter a next phase of delivering  
25  
26 279 the best practice in dual TB/DM patients (Figure 4). The implementation design will study the  
27  
28  
29 280 best clinical practice of dual TB/DM services comprising of TB diagnostics including susceptibility  
30  
31 281 testing, anti-TB therapeutic drug monitoring, and HbA1c for monitoring the DM and guide  
32  
33  
34 282 selection and combination of both anti-TB and anti-DM drugs. Under sequential roll out, or  
35  
36 283 stepped wedge cluster trial design; facilities in each region integrating TB/DM services will be  
37  
38 284 stepwise allocated; (referral hospitals>>district hospitals>>>health centres/dispensaries) to  
39  
40  
41 285 incorporate the best clinical practice package in dual TB/DM case treatment. Three centres from  
42  
43 286 each region will be allocated to start the best practice of TB/DM package interventions  
44  
45  
46 287 concurrently. A new facility level will be subsequently allocated to implement the best practice  
47  
48 288 TB/DM package in steps of 3 months (quarterly) intervals such that a complete coverage of 30  
49  
50  
51 289 health facilities in WP1 will be obtained after 2 years and 9 months. In our previous observational  
52  
53 290 study, we found 16% of TB/DM patients had unfavourable outcomes in Tanzania <sup>16</sup>. We assume  
54  
55 291 that the best practice package will reduce the unfavourable event rate to 8 %. To achieve 90%  
56  
57  
58 292 power to detect this difference with a significance level of 5% with a non-compliance estimated  
59  
60 293 at 8% <sup>43</sup>, the adjusted minimum sample size of 970 TB/DM patients will be rigorously followed <sup>44</sup>.



1  
2 294 TB/DM or TB-HIV/DM individuals will provide baseline sputum for culture and drug susceptibility  
3  
4 295 testing as well as smear microscopy. Patients will also test for HbA1c and renal function test to  
5  
6 296 assess for severity of DM. Two weeks after starting anti-TB medication, blood will be collected  
7  
8  
9 297 for therapeutic drug monitoring of anti-TB drugs. Collection of blood will be through dry blood  
10  
11 298 spot and transported to the Biotechnology Laboratory/Kilimanjaro Clinical Research Institute  
12  
13  
14 299 through Expedited Mail Services. The dry blood spot collection will be processed for testing the  
15  
16 300 serum drug levels starting with rifampicin then isoniazid, and pyrazinamide using an assay  
17  
18  
19 301 validated according to international guidelines<sup>45</sup> Results will be communicated before day 21 of  
20  
21 302 anti-TB treatment, and if needed the anti-TB dosage adjustment will be made. A TDM strategy  
22  
23  
24 303 suitable for fixed dose combination regimen will be applied. In summary, the therapeutic drug  
25  
26 304 monitoring will be performed at week 2 of TB treatment, based on plasma concentrations  
27  
28  
29 305 results, the appropriate FDC tablets can be selected<sup>46 47</sup>. Serum drug exposure that differ at least  
30  
31 306 25% from target concentrations will be considered as clinically relevant <sup>48</sup>. Therefore, those  
32  
33  
34 307 below the target will be eligible for dose adjustment. Two weeks after dose adjustment, the drug  
35  
36 308 concentrations will be confirmed<sup>46</sup>. In the continuation phase, the appropriate fixed drug  
37  
38 309 combination of rifampicin and isoniazid can be selected, based on earlier measured drug  
39  
40  
41 310 concentrations. In addition, routine pharmaco-vigilance will complement the safety data of this  
42  
43 311 strategy. TB/DM cases will have monthly mycobacteriological monitoring for detection of  
44  
45  
46 312 microbiological treatment failure. While DM monitoring will include the assessment of  
47  
48 313 retinopathy, impaired wound healing (diabetic foot), and nephropathy<sup>49 50</sup>. HbA1c and renal  
49  
50  
51 314 function tests will also be followed at month 3 and 6 to enable further anti-DM regimen  
52  
53 315 adjustment.

### 316 **Objective 3 methods: Capacity building on training and applied research**

57  
58 317 Training of the frontline health care providers will follow the “*classical diffusions of innovation*  
59  
60 318 *theory*” drawn by Dearing,2009 <sup>51</sup>. ADEPT will change the current passive delivery of



1  
2 319 international standards of care into an active approach, and the training will be delivered in a  
3  
4 320 step-down approach and will be implemented in phases;

- 5  
6  
7  
8 321     ▪ Phase 1- includes a self-learning package with assessment delivered through a web-based  
9  
10 322         platform. The assessment will be shared to the ADEPT team prior to attending the next  
11  
12 323         phase.
- 13  
14  
15 324     ▪ Phase 2- Learners achieving > 80% of the web-based assessment will be invited to attend  
16  
17 325         training of the trainer (ToT) workshop. Emphasis during this phase will be to expose  
18  
19 326         individuals to acquire the principles, of the technology or innovations or intervention and  
20  
21 327         conduct practical on dual TB/DM and associated co-morbidities including HIV-coinfection,  
22  
23 328         malnutrition and non-communicable chronic lung diseases.
- 24  
25 329     ▪ Phase 3- ToT will receive package/materials to train frontline health service providers in  
26  
27 330         their district. This will be the minimum package for providing dual TB and DM care with  
28  
29 331         short modules and directives to the task to be conducted. ToT will deliver the training to  
30  
31 332         the selected health facilities assigned to him/her.
- 32  
33 333     ▪ Phase 4- Competency of the ToT will combine assessment of best practice portfolio  
34  
35 334         documented at their clinics, and also practice implemented by the trainers s/he  
36  
37 335         empowered.

38  
39 336 Medical education modules on TB/DM and associated comorbidities will be tailored to different  
40  
41 337 roles and associated quality control questions for assessing the level of acquired skills for each  
42  
43 338 type of health care provider (clinicians, nurses, pharmacist and laboratory staff). A minimum  
44  
45 339 threshold of quality control pass will be included as one of the criteria to qualify the health facility  
46  
47 340 to integrate TB/DM services. Other criteria will be sought from the health facility needs  
48  
49 341 assessment tools, which will include availability, and operational infection prevention policy for  
50  
51  
52  
53  
54  
55  
56  
57  
58  
59  
60

1  
2 342 TB controls and equipment for DM diagnosis and prevention of complications. Knowledge  
3  
4 343 comparison will be made pre and post training.  
5

#### 6 344 **Data collection**

8  
9 345 Data collection will be done under routine patient care in clinics. Data management will follow  
10  
11 346 and adhere to the Tanzania Code of Conduct for Research Integrity. Qualitative data will be  
12  
13  
14 347 summarized in qualitative case record forms while quantitative data will be available in the Multi-  
15  
16 348 Schema Information Capture database, which is a customizable format current in use in  
17  
18  
19 349 Kilimanjaro, utilizing secure encryption services (www.mysql.com). Data collection, transfer,  
20  
21 350 entry, validation, queries generation, audit, archival and ownership will be detailed in specific  
22  
23  
24 351 standard operational procedures as described elsewhere<sup>52</sup>.

#### 26 352 **Data analysis plan on dual TB and DM**

27  
28  
29 353 Outcome measures include;

30  
31 354 Bidirectional screening and diagnosis of dual TB/DM disease

- 32  
33  
34 355 • Proportion of facilities capable of providing best practice of TB/DM services
- 35  
36  
37 356 • Proportion of laboratories supporting dual TB/DM services
- 38  
39  
40 357 • Proportion of health care providers trained in best practice on dual TB/DM services
- 41  
42 358 • Proportion of registered TB patients screened for DM
- 43  
44  
45 359 • Proportion of diabetes patients screened for TB
- 46  
47 360 • Proportion of registered TB patients identified with presumptive DM among patients  
48  
49 361 and screened for DM and vice versa
- 50  
51  
52 362 • Proportion of registered TB patients tested for DM and vice versa.
- 53  
54  
55 363 • Proportion of registered TB patients diagnosed with DM and vice versa.
- 56  
57 364 • Proportion of registered DM patients with TB referred to a TB clinic.
- 58  
59 365 • Proportion of registered DM patients with TB started on TB treatment and vice versa.  
60

1  
2 366 **Dual TB/DM treatment outcomes**

3  
4 367 TB treatment outcomes

- 5  
6  
7 368 • Proportion of TB/diabetes patients with favourable outcomes (cured, or treatment  
8 complete) or unfavourable outcomes (death, lost to follow-up, treatment failure)  
9 369  
10  
11 370 • Proportion of TB/DM recurrence of TB one year after completion TB treatment as  
12 determined by sputum culture and advanced genomic technologies.  
13  
14 371  
15  
16 372 • Proportion of TB/DM acquiring DR-TB at the time of failure or TB recurrence  
17  
18  
19 373 • Proportion of TB/DM patients with sub-optimal concentrations of first line anti-TB drugs  
20 at 2nd-week of treatment  
21 374  
22  
23  
24 375 • Proportion of TB/DM with abnormal HbA1c compared to the baseline  
25  
26 376 • Proportion of TB/DM patients with treatment adjustment  
27  
28

29 377 DM complications at baseline and at the end of TB treatment

- 30  
31 378 • Proportion of TB/DM with hypertension, kidney dysfunction as estimated by the  
32 albuminuria/proteinuria, blood urea nitrogen and creatinine  
33 379  
34  
35  
36 380 • Proportional of TB/DM with neuropathy through assessment of bladder or erectile (male)  
37 dysfunction, sensorimotor neuropathy, orthostatic hypotension, sudomotor neuropathy,  
38 frequent non-infective diarrhoea or constipation  
39 381  
40  
41 382  
42  
43  
44 383 • Proportional of TB/DM with retinopathy as graded by severity (none, mild, moderate or  
45 severe)  
46 384  
47

48  
49 385 We will assess the pathway of patients' experience and acceptability of dual TB/DM services  
50  
51 386 <sup>53</sup>.Likewise we will assess the feasibility and acceptability of all steps of ADEPT model as  
52 portrayed in Figure 2.  
53 387  
54  
55

56 388 **Conclusion**

57  
58 389 Health systems in most of sub-Saharan Africa are fragile despite facing an enormous burden of  
59 communicable diseases and NCDs. Unfortunately, resources are scare and therefore the  
60

1  
2 391 situation, as emblematic in the dual TB/DM epidemic in Tanzania, necessitates new thinking and  
3  
4 392 an approach that will eventually build resilient health systems.<sup>54</sup> The proposed ADEPT model will  
5  
6 393 challenge the status quo of the Tanzanian health system in addressing the existing systemic  
7  
8  
9 394 bottlenecks. Yet a key element of the ADEPT model is to create and nurture a learning system,  
10  
11 395 teamwork, collective responsibilities, accountability, and leadership for a common favourable  
12  
13  
14 396 future. Consequently, front line HCPs and other locals will be empowered to innovate around  
15  
16 397 health care delivery and changes that will be likely to have a long-term constructive effect<sup>29</sup>.

### 18 19 398 **ETHICS AND DISSEMINATION**

20  
21 399 This protocol has been approved at the local health research committee serving Kibong'oto  
22  
23  
24 400 Infectious Diseases Hospital and National Health Research Committee with reference numbers  
25  
26 401 KNCHREC003 and NIMR/HQ/R.8a/Vol.IX/2988, respectively. Furthermore, the Ministries of  
27  
28  
29 402 Health and Regional Administrative & Local Government Authority have endorsed  
30  
31 403 implementation of this protocol.

### 32 33 404 **AUTHOR CONTRIBUTIONS**

34  
35  
36 405 Each author has contributed significantly to and is willing to take public responsibility for one or  
37  
38 406 more aspects of the protocol. All authors contributed to the design and provided critical  
39  
40  
41 407 revisions and approved the final version.

### 42 43 408 **FUNDING STATEMENT**

44  
45  
46 409 This study is fully funded by the Danish Ministry of Foreign Affairs, DFC File No. 17-03-KU.

### 47 48 410 **DATA STATEMENT**

49  
50  
51 411 The data sets that will be generated and analysed during the conduct of the study will be made  
52  
53 412 available according to the available laws and regulations

1  
2 414 **ACKNOWLEDGEMENT**

3  
4 415 The authors thank Professor Flemming Konradsen, University of Copenhagen, Denmark for his  
5  
6 416 valuable comments on the research study

8  
9 417 **FIGURES LEGEND**

10  
11 418 Figure 1: This model will break the siloed policy makers, health providers and researchers and  
12  
13 gradually transform the health system into a proactive self-organizing or self-repairing system.  
14 419  
15  
16 420 Essential elements (Performance, Instance Selection, Critique, and Learning), if operated  
17  
18 effectively will form an adaptive learning system. The proposed TB/DM-ADEPT Model will  
19 421  
20  
21 422 interconnect all interactive elements through: (a) Setting a regular single platform for policy  
22  
23 makers, researchers and service providers on TB/DM epidemic agenda (Learning element); (b)  
24 423  
25  
26 424 Implementing international standards of dual TB and DM care through integrative TB/DM  
27  
28 collaborative services that will facilitate early diagnosis while providing individualized treatment  
29 425  
30  
31 426 of patients with dual TB/DM disease (Performance element); (c) Conduct TB/DM applied  
32  
33 research in implementation and health system research science to determine how to deliver best  
34 427  
35  
36 428 practices that will enable a people-centred health system (Critique element); and (d) Train PhD  
37  
38 429 and postdoctoral fellows to answer dual TB/DM health system challenges to strengthen applied  
39  
40 research capacity and hands-on skills to create a critical mass of the next generation of scientists  
41 430  
42  
43 431 able to scale up TB/DM interventions and adapt to study other communicable/ non-  
44  
45 communicable disease intersections (Instance Selection element).  
46 432

47  
48 433 Figure 2: Logic framework model for measuring outcomes and impact

49  
50 434 Figure 3: Hierarchy of needs for strengthening the health system as described by Potter &  
51  
52 Brough<sup>34</sup>

53 435  
54  
55 436 Figure 4: Introduction of integration of TB/DM services thereafter stepwise introduction of  
56  
57 packages comprises of susceptibility, therapeutic drug monitoring, HbA1c for optimal TB/DM  
58 437  
59  
60 438 case management at all levels of health facilities

1  
2 439  
3  
4 440 **COMPETING INTEREST STATEMENT:**  
5

6  
7 441 None declared.  
8

9 442  
10  
11 443 **REFERENCES**  
12  
13

- 14 444 1. Institute for Health Metrics and Evaluation (IHME). Global Burden of Diseases (GBD)  
15 445 Profile;Tanzania, 2010.
- 16 446 2. Commission on Global Health Risk Framework for the Future (GHRF). Accelerating Research and  
17 447 Development to Counter the Threat of Infectious Diseases. The Neglected Dimension of  
18 448 Global Security: A Framework to Counter Infectious Disease Crises. Washington (DC)2016.
- 19 449 3. Ministry of Health. Ministry of Health -Tanzania. Health Sector Strategic Plan IV (2015-2020),  
20 450 2015.
- 21 451 4. Liyoyo A, Heysell SK, Kisonga RM, et al. Gridlock from diagnosis to treatment of Multidrug-  
22 452 Resistant Tuberculosis (MDR-TB) in Tanzania: Illuminating Potential Factors for Possible  
23 453 Intervention. *East African Health Research Journal* 2017;1(1)
- 24 454 5. Mpagama SG, Heysell SK, Ndusilo ND, et al. Diagnosis and interim treatment outcomes from the  
25 455 first cohort of multidrug-resistant tuberculosis patients in Tanzania. *PLoS One*  
26 456 2013;8(5):e62034. doi: 10.1371/journal.pone.0062034
- 27 457 6. Mpagama SG, Mangi E, Mbelele PM, et al. Gridlock from diagnosis to treatment of multidrug  
28 458 resistant tuberculosis (MDR-TB) in Tanzania: Patients perspectives from the focus group  
29 459 discussion. *bioRxiv pre print* 2018;doi: <http://dx.doi.org/10.1101/402594>. doi:  
30 460 10.1101/402594
- 31 461 7. Mpagama SG, Mbelele PM, Chongolo AM, et al. Gridlock from diagnosis to treatment of  
32 462 multidrug-resistant tuberculosis in Tanzania: low accessibility of molecular diagnostic  
33 463 services and lack of healthcare worker empowerment in 28 districts of 5 high burden TB  
34 464 regions with mixed methods evaluation. *BMC Public Health* 2019;19(1) doi:  
35 465 10.1186/s12889-019-6720-6
- 36 466 8. Bryan L, Conway M, Keesmaat T, et al. Strengthening sub-Saharan Africa's health systems: A  
37 467 practical approach | McKinsey & Company. *Health Systems & Services* 2010:1-11.
- 38 468 9. Harries AD, Murray MB, Jeon CY, et al. Defining the research agenda to reduce the joint burden  
39 469 of disease from diabetes mellitus and tuberculosis. *Trop Med Int Health* 2010;15(6):659-63.  
40 470 doi: 10.1111/j.1365-3156.2010.02523.x
- 41 471 10. Workneh MH, Bjune GA, Yimer SA. Prevalence and associated factors of tuberculosis and  
42 472 diabetes mellitus comorbidity: A systematic review. *PLoS One* 2017;12(4):e0175925. doi:  
43 473 10.1371/journal.pone.0175925 [published Online First: 2017/04/22]
- 44 474 11. Jeon CY, Murray MB. Diabetes mellitus increases the risk of active tuberculosis: a systematic  
45 475 review of 13 observational studies. *PLoS Med* 2008;5(7):e152. doi:  
46 476 10.1371/journal.pmed.0050152
- 47 477 12. Faurholt-Jepsen D, Range N, Praygod G, et al. Diabetes is a risk factor for pulmonary  
48 478 tuberculosis: a case-control study from Mwanza, Tanzania. *PLoS One* 2011;6(8):e24215.  
49 479 doi: 10.1371/journal.pone.0024215 [published Online First: 2011/09/14]
- 50 480 13. Bali Declaration on the Looming TB-Diabetes Co-epidemic. Stopping a looming Co-epidemic: A  
51 481 global Summit on Diabetes and Tuberculosis; 2-3 November 2015; Bali-Indonesia.  
52 482  
53  
54  
55  
56  
57  
58  
59  
60



- 1  
2 482 14. Kapur A, Harries AD, Lönnroth K, et al. Diabetes and tuberculosis co-epidemic: the Bali  
3 483 Declaration. *The Lancet Diabetes & Endocrinology* 2016;4(1):8-10. doi: 10.1016/s2213-  
4 484 8587(15)00461-1
- 5 485 15. Sariko ML, Mpagama SG, Gratz J, et al. Glycated hemoglobin screening identifies patients  
6 486 admitted for retreatment of tuberculosis at risk for diabetes in Tanzania. *J Infect Dev Ctries*  
7 487 2016;10(4):423-6. doi: 10.3855/jidc.7324
- 8 488 16. Faurholt-Jepsen D, Range N, PrayGod G, et al. Diabetes is a strong predictor of mortality during  
9 489 tuberculosis treatment: a prospective cohort study among tuberculosis patients from  
10 490 Mwanza, Tanzania. *Trop Med Int Health* 2013;18(7):822-9. doi: 10.1111/tmi.12120
- 11 491 17. Workneh MH, Bjune AG, Yimer SA. Diabetes mellitus is associated with increased mortality  
12 492 during tuberculosis treatment: a prospective cohort study among tuberculosis patients in  
13 493 South-Eastern Amahra Region, Ethiopia. *Infectious Diseases of Poverty* 2016;5(22):10. doi:  
14 494 0.1186/s40249-016-0115-z
- 15 495 18. Harries AD, Kumar AMV, Satyanarayana S, et al. Addressing diabetes mellitus as part of the  
16 496 strategy for ending TB. *Trans R Soc Trop Med Hyg* 2016;110:173-79. doi:  
17 497 0.1093/trstmh/trv111
- 18 498 19. Singhal A, Jie L, Kumar P, et al. Metformin as adjunct antituberculosis therapy. *Sci Transl Med*  
19 499 2014;6(263):263ra159. doi: 10.1126/scitranslmed.3009885 [published Online First:  
20 500 2014/11/21]
- 21 501 20. Park S, Yang BR, Song HJ, et al. Metformin and tuberculosis risk in elderly patients with  
22 502 diabetes mellitus. *Int J Tuberc Lung Dis* 2019;23(8):924-30. doi: 10.5588/ijtld.18.0687  
23 503 [published Online First: 2019/09/20]
- 24 504 21. Heysell SK, Moore JL, Keller SJ, et al. Therapeutic drug monitoring for slow response to  
25 505 tuberculosis treatment in a state control program, Virginia, USA. *Emerg Infect Dis*  
26 506 2010;16(10):1546-53. doi: 10.3201/eid1610.100374
- 27 507 22. Aftab H, Christensen DL, Ambreen A, et al. Tuberculosis-Related Diabetes: Is It Reversible after  
28 508 Complete Treatment? *Am J Trop Med Hyg* 2017;97(4):1099-102. doi: 10.4269/ajtmh.16-  
29 509 0816 [published Online First: 2017/08/19]
- 30 510 23. Wang JY, Lee MC, Shu CC, et al. Optimal duration of anti-TB treatment in patients with  
31 511 diabetes: nine or six months? *Chest* 2015;147(2):520-28. doi: 10.1378/chest.14-0918
- 32 512 24. Chiang CY, Bai KJ, Lin HH, et al. The influence of diabetes, glycemic control, and diabetes-  
33 513 related comorbidities on pulmonary tuberculosis. *PLoS One* 2015;10(3):e0121698. doi:  
34 514 10.1371/journal.pone.0121698
- 35 515 25. Heysell S, Mtabho C, Mpagama S, et al. Plasma drug activity assay for treatment optimization  
36 516 in tuberculosis patients. *Antimicrobial agents and chemotherapy* 2011;55(12):5819-25. doi:  
37 517 10.1128/AAC.05561-11 [published Online First: 2011/10/05]
- 38 518 26. Tostmann A, Mtabho CM, Semvua HH, et al. Pharmacokinetics of first-line tuberculosis drugs in  
39 519 Tanzanian patients. *Antimicrob Agents Chemother* 2013;57(7):3208-13. doi:  
40 520 10.1128/AAC.02599-12
- 41 521 27. Nahid P, Dorman SE, Alipanah N, et al. Official American Thoracic Society/Centers for Disease  
42 522 Control and Prevention/Infectious Diseases Society of America Clinical Practice Guidelines:  
43 523 Treatment of Drug-Susceptible Tuberculosis. *Clinical infectious diseases : an official*  
44 524 *publication of the Infectious Diseases Society of America* 2016;63(7):e147-95. doi:  
45 525 10.1093/cid/ciw376 [published Online First: 2016/08/16]
- 46 526 28. Ghimire S, Bolhuis M, Sturkenboom M, et al. Incorporating therapeutic drug monitoring into  
47 527 the World Health Organization hierarchy of tuberculosis diagnostics. *The European*  
48 528 *respiratory journal* 2016;47(6):1867-9. doi: 10.1183/13993003.02142-2015 [published  
49 529 Online First: 2016/03/19]
- 50  
51  
52  
53  
54  
55  
56  
57  
58  
59  
60

- 1  
2 530 29. Swanson RC, Cattaneo A, Bradley E, et al. Rethinking health systems strengthening: key  
3 531 systems thinking tools and strategies for transformational change. *Health Policy Plan*  
4 532 2012;27 Suppl 4:iv54-61. doi: 10.1093/heapol/czs090 [published Online First: 2012/10/04]  
5 533 30. Alkabab Y, Keller S, Dodge D, et al. Early interventions for diabetes related tuberculosis  
6 534 associate with hastened sputum microbiological clearance in Virginia, USA. *BMC Infect Dis*  
7 535 2017;17(1):125. doi: 10.1186/s12879-017-2226-y  
8 536 31. Lo H-Y, Yang S-L, Lin HH, et al. Does enhanced diabetes management reduce the risk and  
9 537 improve the outcome of tuberculosis? *Int J Tuberc Lung Dis* 2016;20(3):376-82. doi:  
10 538 0.5588/ijtld.15.0654  
11 539 32. Lönnroth K, Roglic G, Harries AD. Improving tuberculosis prevention and care through  
12 540 addressing the global diabetes epidemic: from evidence to policy and practice. *The Lancet*  
13 541 *Diabetes & Endocrinology* 2014;2(9):730-39. doi: 10.1016/s2213-8587(14)70109-3  
14 542 33. De-Regil LM, Pena-Rosas JP, Flores-Ayala R, et al. Development and use of the generic  
15 543 WHO/CDC logic model for vitamin and mineral interventions in public health programmes.  
16 544 *Public Health Nutr* 2014;17(3):634-9. doi: 10.1017/S1368980013000554 [published Online  
17 545 First: 2013/03/20]  
18 546 34. Potter C, Brough R. Systemic capacity building: a hierarchy of needs. *Health Policy Plan*  
19 547 2004;19(5):336-45. doi: 10.1093/heapol/czh038 [published Online First: 2004/08/18]  
20 548 35. Hales S, Leshner-Trevino A, Ford N, et al. Reporting guidelines for implementation and  
21 549 operational research. *Bull World Health Organ* 2016;94(1):58-64. doi:  
22 550 10.2471/BLT.15.167585 [published Online First: 2016/01/16]  
23 551 36. Shayo FK, Shayo SC. Availability and readiness of diabetes health facilities to manage  
24 552 tuberculosis in Tanzania: a path towards integrating tuberculosis-diabetes services in a high  
25 553 burden setting? *BMC Public Health* 2019;19(1):1104. doi: 10.1186/s12889-019-7441-6  
26 554 [published Online First: 2019/08/16]  
27 555 37. World Health Organization (WHO). How to investigate drug use in health facilities: Selected  
28 556 drug use indicators. Action Programme on Essential Drugs, 1993.  
29 557 38. Riza AL, Pearson F, Ugarte-Gil C, et al. Clinical management of concurrent diabetes and  
30 558 tuberculosis and the implications for patient services. *The Lancet Diabetes & Endocrinology*  
31 559 2014;2(9):740-53. doi: 10.1016/s2213-8587(14)70110-x  
32 560 39. World Health Organization (WHO). Collaborative Framework for Care and Control of  
33 561 Tuberculosis and Diabetes In: Stop TB Department and Department of Chronic Diseases  
34 562 and Health Promotion WHO, Geneva, Switzerland and The International Union Against  
35 563 Tuberculosis and Lung Diseases Paris France, ed., 2011.  
36 564 40. Mave V, Nimkar S, Prasad H, et al. Tuberculosis screening among persons with diabetes  
37 565 mellitus in Pune, India. *BMC Infect Dis* 2017;17(1):388. doi: 10.1186/s12879-017-2483-9  
38 566 [published Online First: 2017/06/05]  
39 567 41. Byashalira K, Mbelele P, Semvua H, et al. Clinical outcomes of new algorithm for diagnosis and  
40 568 treatment of Tuberculosis sepsis in HIV patients. *International Journal of Mycobacteriology*  
41 569 2019;8(4) doi: 10.4103/ijmy.ijmy\_135\_19  
42 570 42. van Crevel R, Koesoemadinata R, Hill PC, et al. Clinical management of combined tuberculosis  
43 571 and diabetes. *Int J Tuberc Lung Dis* 2018;22(12):1404-10. doi: 10.5588/ijtld.18.0340  
44 572 [published Online First: 2019/01/05]  
45 573 43. Sealed Envelope Ltd. Power calculator for continuous outcome superiority trial: Accessed on  
46 574 2017.  
47 575 44. Boeree MJ, Heinrich N, Aarnoutse R, et al. High-dose rifampicin, moxifloxacin, and SQ109 for  
48 576 treating tuberculosis: a multi-arm, multi-stage randomised controlled trial. *The Lancet*  
49 577 *Infectious Diseases* 2016 doi: 10.1016/s1473-3099(16)30274-2  
50  
51  
52  
53  
54  
55  
56  
57  
58  
59  
60



- 1  
2 578 45. Capiou S, Veenhof H, Koster RA, et al. Official International Association for Therapeutic Drug  
3 579 Monitoring and Clinical Toxicology Guideline. *Therapeutic Drug Monitoring* 2019;41(4):409-  
4 580 30. doi: 10.1097/ftd.0000000000000643  
5 581 46. van der Burgt EP, Sturkenboom MG, Bolhuis MS, et al. End TB with precision treatment! *Eur*  
6 582 *Respir J* 2016;47(2):680-2. doi: 10.1183/13993003.01285-2015 [published Online First:  
8 583 2016/02/02]  
9 584 47. Zuur MA, Akkerman OW, Davies Forsman L, et al. Fixed-dose combination and therapeutic  
10 585 drug monitoring in tuberculosis: friend or foe? *Eur Respir J* 2016;48(4):1230-33. doi:  
11 586 10.1183/13993003.00833-2016 [published Online First: 2016/09/03]  
13 587 48. Alffenaar JC, Gumbo T, Dooley KE, et al. Integrating Pharmacokinetics and Pharmacodynamics  
14 588 in Operational Research to End Tuberculosis. *Clin Infect Dis* 2020;70(8):1774-80. doi:  
15 589 10.1093/cid/ciz942 [published Online First: 2019/09/29]  
16 590 49. Prada-Medina CA, Fukutani KF, Pavan Kumar N, et al. Systems Immunology of Diabetes-  
17 591 Tuberculosis Comorbidity Reveals Signatures of Disease Complications. *Sci Rep*  
19 592 2017;7(1):1999. doi: 10.1038/s41598-017-01767-4 [published Online First: 2017/05/19]  
20 593 50. Kumar NP, Moideen K, Sivakumar S, et al. Tuberculosis-diabetes co-morbidity is characterized  
21 594 by heightened systemic levels of circulating angiogenic factors. *J Infect* 2017;74(1):10-21.  
22 595 doi: 10.1016/j.jinf.2016.08.021 [published Online First: 2016/10/09]  
24 596 51. Dearing JW. Applying Diffusion of Innovation Theory to Intervention Development. *Res Soc*  
25 597 *Work Pract* 2009;19(5):503-18. doi: 10.1177/1049731509335569 [published Online First:  
26 598 2010/10/27]  
27 599 52. Martin DL, Hoff JL, Gard RA, et al. Data collection, processing, validation, and verification.  
28 600 *Health Phys* 2008;95(1):36-46. doi: 10.1097/01.HP.0000298817.72107.48 [published  
30 601 Online First: 2008/06/12]  
31 602 53. Hammarberg K, Kirkman M, de Lacey S. Qualitative research methods: when to use them and  
32 603 how to judge them. *Hum Reprod* 2016;31(3):498-501. doi: 10.1093/humrep/dev334  
33 604 [published Online First: 2016/01/14]  
35 605 54. Bygbjerg IC. Double burden of noncommunicable and infectious diseases in developing  
36 606 countries. *Science* 2012;337(6101):1499-501. doi: 10.1126/science.1223466 [published  
37 607 Online First: 2012/09/22]  
38 608  
39  
40  
41 609  
42  
43  
44  
45  
46  
47  
48  
49  
50  
51  
52  
53  
54  
55  
56  
57  
58  
59  
60

- Interface between research and the performance
- Translate abstract recommendations of the critic into specific changes in the rules or parameters used by the performance element

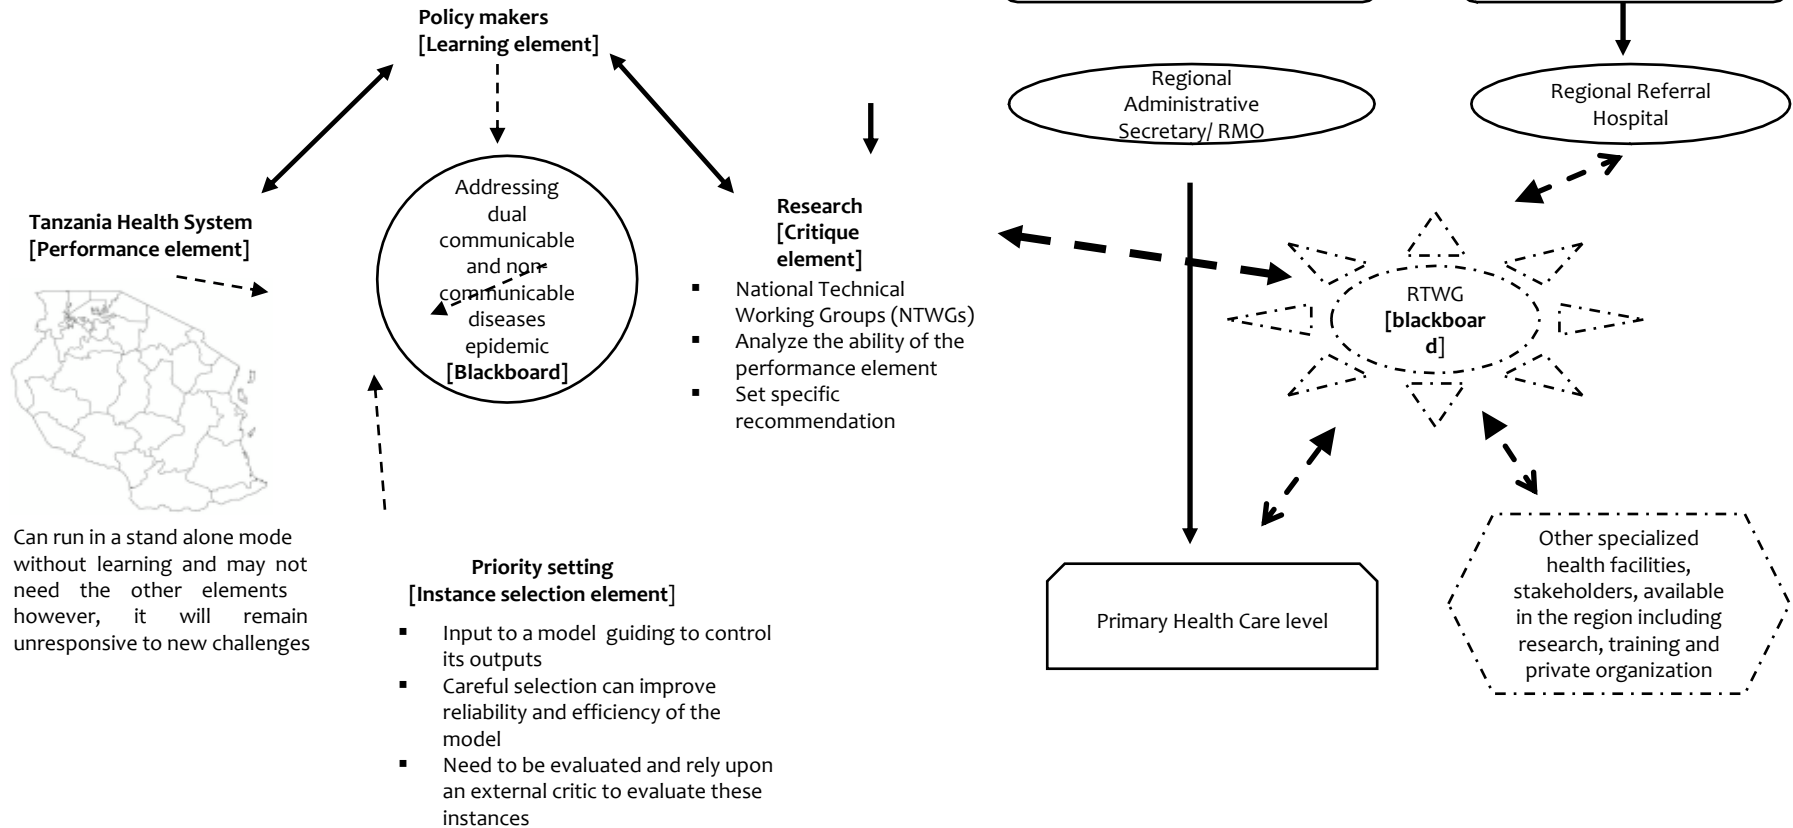

Can run in a stand alone mode without learning and may not need the other elements however, it will remain unresponsive to new challenges

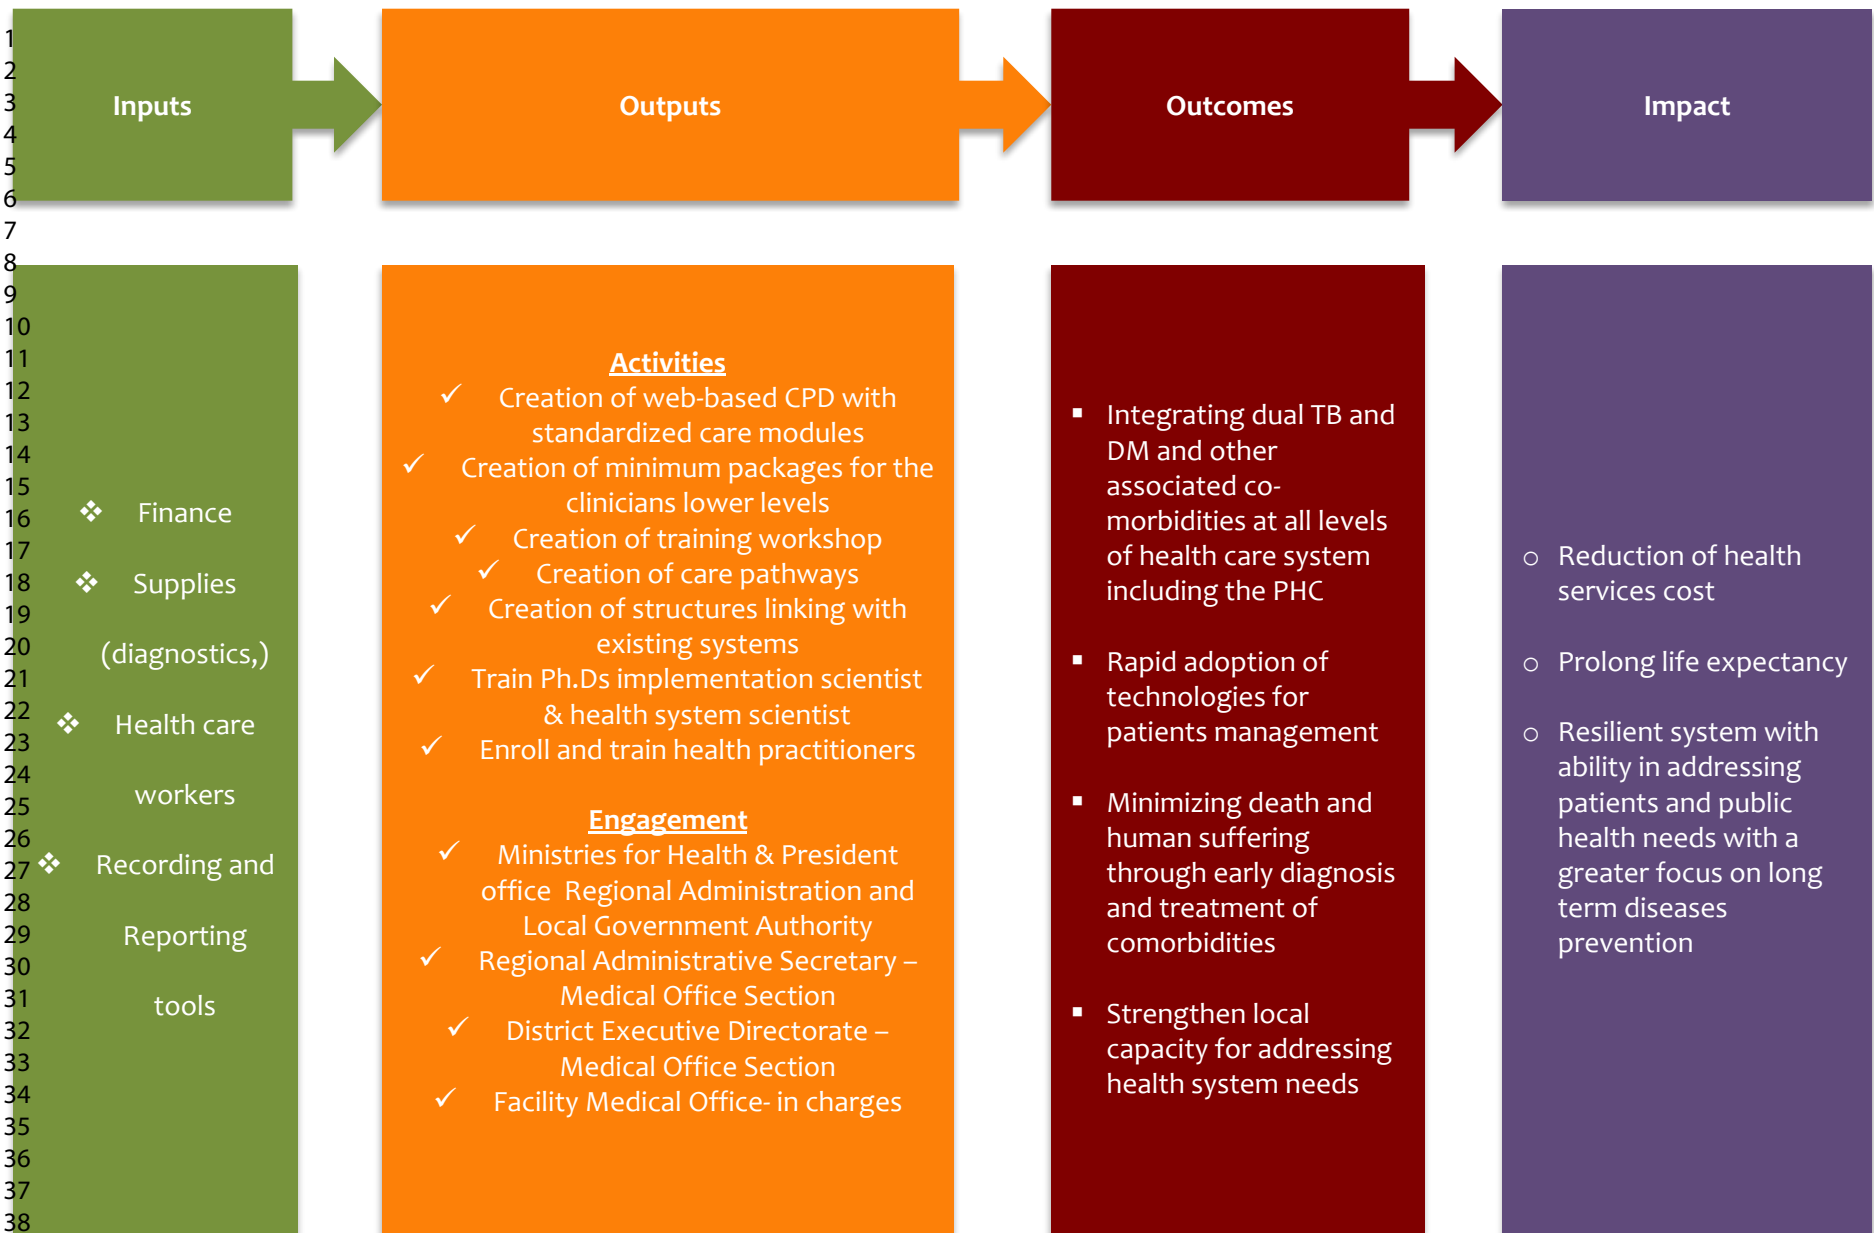

39  
40  
41

1  
2  
3  
4  
5  
6  
7  
8  
9  
10  
11  
12  
13  
14  
15  
16  
17  
18  
19  
20  
21  
22  
23  
24  
25  
26  
27  
28  
29  
30  
31  
32  
33  
34  
35  
36  
37  
38  
39  
40  
41

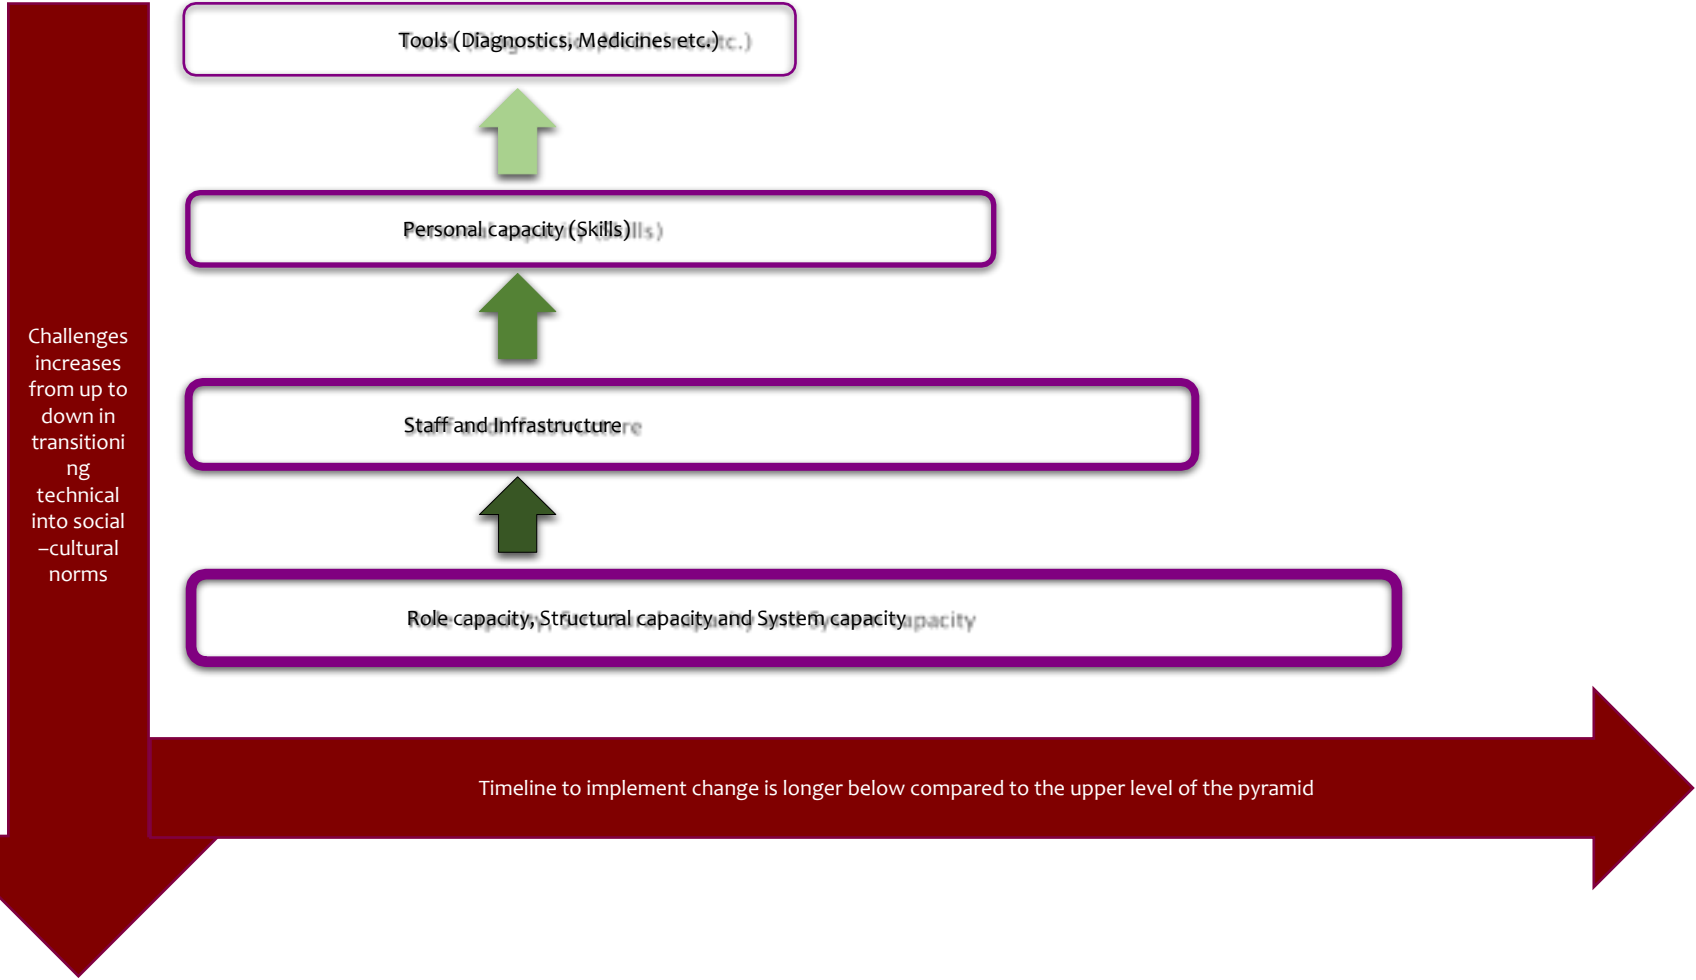

Integrating dual TB/DM services

Implementing Best Practice Package

- 1
- 2
- 3
- 4
- 5
- 6
- 7
- 8
- 9 Dispensaries
- 10
- 11
- 12
- 13 Health centers
- 14
- 15
- 16
- 17
- 18 District Hospitals
- 19
- 20
- 21
- 22
- 23 Referral Hospitals
- 24
- 25
- 26
- 27
- 28
- 29
- 30
- 31
- 32
- 33
- 34
- 35
- 36
- 37
- 38
- 39
- 40
- 41

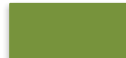

Control Condition

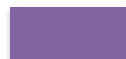

Intervention with best practice package

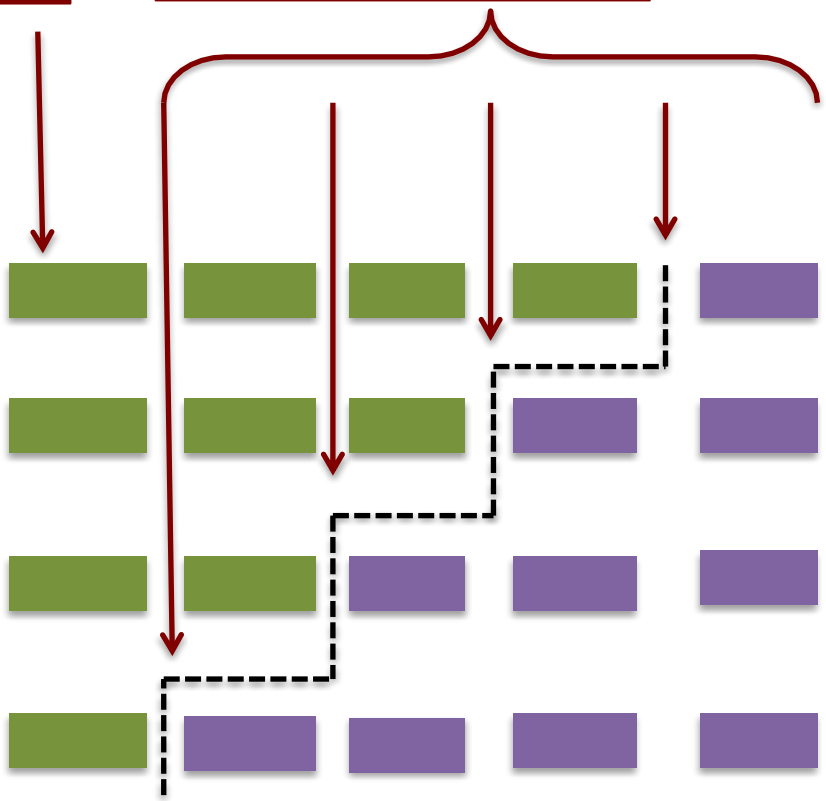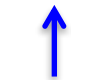

Cluster

# BMJ Open

**Protocol for establishing an Adaptive Diseases control Expert Programme in Tanzania (ADEPT) for integrating care of communicable and non-communicable diseases using tuberculosis and diabetes as a case study.**

|                                 |                                                                                                                                                                                                                                                                                                                                                                                                                                                                                                                                                                                                          |
|---------------------------------|----------------------------------------------------------------------------------------------------------------------------------------------------------------------------------------------------------------------------------------------------------------------------------------------------------------------------------------------------------------------------------------------------------------------------------------------------------------------------------------------------------------------------------------------------------------------------------------------------------|
| Journal:                        | <i>BMJ Open</i>                                                                                                                                                                                                                                                                                                                                                                                                                                                                                                                                                                                          |
| Manuscript ID                   | bmjopen-2020-041521.R1                                                                                                                                                                                                                                                                                                                                                                                                                                                                                                                                                                                   |
| Article Type:                   | Protocol                                                                                                                                                                                                                                                                                                                                                                                                                                                                                                                                                                                                 |
| Date Submitted by the Author:   | 12-Dec-2020                                                                                                                                                                                                                                                                                                                                                                                                                                                                                                                                                                                              |
| Complete List of Authors:       | Mpagama, Stelah; KIDH, Medical Ramaiya, Kaushik; Shree Hindu Mandal Hospital Lillebæk, Troels ; Statens Serum Institut, mmbaga, blandina Sumari-de Boer, Marion; Kilimanjaro Clinical Research Institute Ntinginya, Nyanda; 6. National Institute of Medical Research-Mbeya Medical Research Centre Alffenaar, Jan-Willem; Rijksuniversiteit Groningen, Heysell, Scott; University of Virginia, Division of Infectious Diseases and International Health Bygbjerg, Ib; University of Copenhagen, 1Department for International Health, Immunology and Microbiology Christensen, Dirk L.; Univ Copenhagen |
| <b>Primary Subject Heading</b>: | Global health                                                                                                                                                                                                                                                                                                                                                                                                                                                                                                                                                                                            |
| Secondary Subject Heading:      | Patient-centred medicine, Public health, Health services research                                                                                                                                                                                                                                                                                                                                                                                                                                                                                                                                        |
| Keywords:                       | Tuberculosis < INFECTIOUS DISEASES, Public health < INFECTIOUS DISEASES, Diabetes & endocrinology < INTERNAL MEDICINE                                                                                                                                                                                                                                                                                                                                                                                                                                                                                    |
|                                 |                                                                                                                                                                                                                                                                                                                                                                                                                                                                                                                                                                                                          |

SCHOLARONE™  
Manuscripts



I, the Submitting Author has the right to grant and does grant on behalf of all authors of the Work (as defined in the below author licence), an exclusive licence and/or a non-exclusive licence for contributions from authors who are: i) UK Crown employees; ii) where BMJ has agreed a CC-BY licence shall apply, and/or iii) in accordance with the terms applicable for US Federal Government officers or employees acting as part of their official duties; on a worldwide, perpetual, irrevocable, royalty-free basis to BMJ Publishing Group Ltd ("BMJ") its licensees and where the relevant Journal is co-owned by BMJ to the co-owners of the Journal, to publish the Work in this journal and any other BMJ products and to exploit all rights, as set out in our [licence](#).

The Submitting Author accepts and understands that any supply made under these terms is made by BMJ to the Submitting Author unless you are acting as an employee on behalf of your employer or a postgraduate student of an affiliated institution which is paying any applicable article publishing charge ("APC") for Open Access articles. Where the Submitting Author wishes to make the Work available on an Open Access basis (and intends to pay the relevant APC), the terms of reuse of such Open Access shall be governed by a Creative Commons licence – details of these licences and which [Creative Commons](#) licence will apply to this Work are set out in our licence referred to above.

Other than as permitted in any relevant BMJ Author's Self Archiving Policies, I confirm this Work has not been accepted for publication elsewhere, is not being considered for publication elsewhere and does not duplicate material already published. I confirm all authors consent to publication of this Work and authorise the granting of this licence.

**TITLE:** Protocol for establishing an Adaptive Diseases control Expert Programme in Tanzania (ADEPT) for integrating care of communicable and non-communicable diseases using tuberculosis and diabetes as a case study.

**AUTHORS:** Stellah G Mpagama<sup>1, 2</sup>, Kaushik Ramaiya<sup>3</sup>, Troels Lillebaek<sup>4,12</sup>, Blandina T Mmbaga<sup>2,5</sup>, Marion Sumari-de Boer<sup>5</sup>, Nyanda Elias Ntinginya<sup>6</sup>, Jan-Willem Alffenaar<sup>7,8,9,10</sup>, Scott Heysell<sup>11</sup>, Ib Christian Bygbjerg<sup>12</sup>, Dirk Lund Christensen<sup>12</sup>

1. Kibong'oto Infectious Diseases Hospital, Mae Street, Lomakaa Road -Siha, Kilimanjaro
2. Kilimanjaro Christian Medical College, Sokoine Street, Moshi, Tanzania.
3. Department of internal medicine, Hindu Mandal Hospital, Dar es Salaam, Tanzania.
4. Statens Serum Institut (SSI), Copenhagen. Denmark
5. Kilimanjaro Clinical Research Institute (KCRI), PO Box 2236, Moshi, Tanzania
6. National Institute of Medical Research-Mbeya Medical Research Centre, Hospital Hill Road, Mbeya, Tanzania
7. University of Groningen, University Medical Center Groningen, Department of Clinical Pharmacy and Pharmacology, Groningen,
8. University of Sydney, Faculty of Medicine and Health, School of Pharmacy, Sydney, Australia
9. Westmead Hospital, Sydney, Australia
10. Marie Bashir Institute of Infectious Diseases and Biosecurity, University of Sydney, Sydney, Australia
11. University of Virginia, Division of Infectious Diseases and International Health, Charlottesville, Virginia, U.S.A



12. Section of Global Health, Department of Public Health, University of Copenhagen,  
Copenhagen, Denmark

Stellah G Mpagama: [smpagama@kidh.go.tz](mailto:smpagama@kidh.go.tz)

Kaushik Ramaiya: [ceo@hc.shm.or.tz](mailto:ceo@hc.shm.or.tz)

Troels Lillebaek: [tll@ssi.dk](mailto:tll@ssi.dk)

Blandina T Mmbaga: [b.mmbaga@kcri.ac.tz](mailto:b.mmbaga@kcri.ac.tz)

Marion Sumari-de Boer: [m.sumari@kcri.ac.tz](mailto:m.sumari@kcri.ac.tz)

Nyanda Elias Ntinginya: [nelias@nimr-mmrc.org](mailto:nelias@nimr-mmrc.org)

Jan-Willem Alffenaar: [johannes.alfenaar@sydney.edu.au](mailto:johannes.alfenaar@sydney.edu.au)

Scott Heysell: [skh8r@hscmail.mcc.virginia.edu](mailto:skh8r@hscmail.mcc.virginia.edu)

Ib Christian Bygbjerg: [iby@sund.ku.dk](mailto:iby@sund.ku.dk)

Dirk Lund Christensen: [dirklc@sund.ku.dk](mailto:dirklc@sund.ku.dk)

### Corresponding Author

Stellah G. Mpagama

Kibong'oto Infectious Diseases Hospital

Mae Street, Lomakaa road

Siha Kilimanjaro

Tanzania

[sempagama@yahoo.com](mailto:sempagama@yahoo.com)

255754860576

### Keywords

Adaptive diseases intervention programme, Communicable and non-communicable dual epidemics, tuberculosis and diabetes dual epidemic, health systems, implementation science

**Main manuscript words count = 3856**

1  
2 55 **ABSTRACT**

3  
4 56 **Introduction:** Most sub-Saharan African countries endure a high burden of communicable  
5  
6 57 diseases but also face a rise of non-communicable illnesses. Interventions targeting particular  
7  
8 58 epidemics are often executed within vertical programmes. We aim to develop a model that will  
9  
10 59 strengthen health systems by shifting traditional vertical programmes to an adaptive diseases  
11  
12 60 management approach through integrating communicable and non-communicable diseases  
13  
14 61 diagnosis and management using the tuberculosis (TB) and diabetes mellitus (DM) dual epidemic  
15  
16 62 as a case study.  
17  
18  
19  
20

21 63 **Methods and analysis:** This programme will use a mixed research design, with both qualitative  
22  
23 64 and quantitative approaches. Qualitative approach will explore patients with dual TB/DM  
24  
25 65 experiences they encountered during health care seeking in health facilities and their  
26  
27 66 perspectives centering on integration. A prospective cohort design will be used in assessing  
28  
29 67 integration of TB and DM services to enable early diagnosis of dual TB/DM cases. Lastly, a  
30  
31 68 stepped-wedge cluster randomized trial will assess the impact of introducing individualized  
32  
33 69 TB/DM practices at the health care facility providing clinical management services level. A  
34  
35 70 blueprint for addressing communicable and non-communicable dual epidemics will be  
36  
37 71 developed using several tools and techniques such as a collection of stakeholders' views and  
38  
39 72 literature reviews, monitoring of key indicators in the TB/DM case study, and applying a system  
40  
41 73 thinking approach to essential elements in the health service delivery.  
42  
43  
44  
45  
46  
47

48 74 **Ethics and Dissemination:** Ethical approval was granted by The National Research Health Ethical  
49  
50 75 Committee (reference number NIMR/HQ/R.8a/Vol.IX/2988) and the implementation was  
51  
52 76 endorsed by the President Office Regional Administration and Local Government Authority. The  
53  
54 77 results will be proactively disseminated through peer-reviewed open access journals, policy  
55  
56 78 briefs, engagement with various stakeholders and community advisory boards, public  
57  
58 79 engagement activities, conference presentations, and social media.  
59  
60

1  
2 80  
3  
4 81  
5  
6 82  
7  
8  
9 83  
10  
11 84  
12  
13  
14 85  
15  
16 86  
17  
18  
19 87  
20  
21 88  
22  
23  
24 89  
25  
26 90  
27  
28  
29 91  
30  
31 92  
32  
33  
34 93  
35  
36 94  
37  
38  
39 95  
40  
41 96  
42  
43 97  
44  
45  
46 98  
47  
48 99  
49  
50  
51 100  
52  
53 101  
54  
55  
56 102  
57  
58 103  
59  
60 104

## ARTICLE SUMMARY

### Strengths and limitations of this study

- The study is conducted in pragmatic settings using a mixed study design to allow triangulation
- Considers service delivery at varying health facilities levels while covering urban, semi-urban and rural settings
- The proposed ADEPT model outcome considers process and patient-centered outcomes
- Lack of randomization of study settings or health facilities may introduce bias

## INTRODUCTION

Tanzania like other sub-Saharan African countries endures a high burden of communicable infections including multidrug resistant pathogens; but also a concurrent rise of non-communicable diseases (NCD) as populations urbanize, diets “westernize” and lifespans lengthen <sup>1</sup>. The health system is largely inflexible and during various periods of disease epidemics, the health management teams operate in crisis-mode with limited capacity to plan for long-term disease prevention <sup>2</sup>. Currently in Tanzania, planned interventions for several longstanding and socioeconomically draining epidemics like tuberculosis (TB) and diabetes mellitus (DM) and their associated comorbidities, are executed within disease specific or vertical programmes <sup>3</sup>. Vertical programmes operate in silos while in reality various communicable and NCDs and treatments can influence one another, and overlap in populations of shared genetic backgrounds or environmental exposures, and in communities with similar socioeconomic determinants of health. Vertical programmes can significantly constrain health care delivery, and represent a top-down approach that is rarely efficient or cost-effective, particularly when considering prevailing regional health challenges <sup>4</sup>.

This sobering fact has been illuminated in recent study of different vertical programmes in

1  
2 105 Tanzania. We recently completed a compendium of research studies that uncovered a health  
3  
4 106 system gridlock for patients trying to negotiate the road from diagnosis to treatment of TB<sup>5-8</sup>.  
5  
6 107 There was a widespread underuse of the technologies mostly due to inadequate dissemination  
7  
8  
9 108 of healthcare provider knowledge and skills on clinical application and interpretation of  
10  
11 109 molecular diagnostics despite clear patient preference for onsite rapid results and moving assays  
12  
13  
14 110 to meet patients where they were at along the care continuum <sup>9</sup>. Likewise, there was not only  
15  
16 111 minimal resources to implement international consensus diagnostics, but also an absence of  
17  
18  
19 112 linkage to care for patients presenting with TB and with need to triage to adequate DM services  
20  
21 113 <sup>10</sup>. Similarly, in Tanzania DM services are centralized at the district and referral health facilities  
22  
23  
24 114 but also front-line health care providers were ill-prepared for DM management<sup>11</sup>. Research  
25  
26 115 studies conducted in different programmes to identify multi-morbidity, particularly the NCDs,  
27  
28  
29 116 have found a considerable burden of people harbouring multiple common diseases<sup>12</sup>. The  
30  
31 117 observed increasing prevalence of dual communicable and emerging non-communicable  
32  
33  
34 118 multimorbidity epidemics and the existing systemic bottlenecks suggest the urgent need for  
35  
36 119 modification of models of health care delivery. We developed a model to strengthen health  
37  
38 120 systems by shifting traditional vertical programmes to a patient-centred adaptive diseases  
39  
40  
41 121 control approach through integrating communicable and NCDs. Henceforth, we describe the  
42  
43 122 strategy to establish a contemporary **Adaptive Diseases control Expert Programme in Tanzania**  
44  
45 123 (Figure 1) (**ADEPT**), focusing on the TB/DM co-epidemic.  
46  
47  
48 124 The dual TB/DM epidemic is ideal as a case for our ADEPT model because worldwide evidence  
49  
50  
51 125 shows a 3-fold increase of active TB in populations with DM compared to those without DM,  
52  
53 126 while the global prevalence of TB in DM populations ranges from 1% -14%<sup>13,14</sup>. In Tanzania, the  
54  
55 127 effect was slightly higher and estimated at nearly 4-fold increase of active TB in DM population<sup>15</sup>.  
56  
57  
58 128 Indeed, stakeholders from The International Union Against Tuberculosis and Lung Disease and  
59  
60 129 the World Diabetes Foundation outlined the historic Bali Initiative on TB and DM (endorsed by

1  
2 130 World Health Organization (WHO)), stating:  
3  
4 131 “▪That TB and DM represent two of the greatest global health challenges of our time, and their  
5  
6 132 convergence globally represents a looming co-epidemic,  
7  
8  
9 133 ▪That this looming co-epidemic threatens progress against TB,  
10  
11 134 ▪That, based on what we have learned from past co-epidemics, particularly TB-HIV, we must act  
12  
13  
14 135 early and decisively to avoid large numbers of avoidable deaths”<sup>16,17</sup>.

15  
16 136 We understand this urgency all too well in Tanzania. Recently, we have observed an increase in  
17  
18  
19 137 the incidence of dual diagnosed patients with TB/DM ranging from 4% of all TB patients in rural  
20  
21 138 areas to 17% in urban settings, resulting in a 5-fold increase of death compared to TB patients  
22  
23  
24 139 without DM<sup>18,19</sup>. Importantly, our research has determined that these deaths primarily occur  
25  
26 140 early, in the first three months of TB treatment<sup>18,19</sup>. We now understand that this high and early  
27  
28  
29 141 mortality from TB/DM in Tanzania is due to both programmatic and biological factors<sup>20</sup>. For  
30  
31 142 example, TB and DM services are not linked and these separated service lines lead to delayed  
32  
33  
34 143 interventions for both diseases<sup>21</sup>. Interestingly, targeted drug therapy of dual TB/DM disease  
35  
36 144 may also open new ways of enhancing the effect of essential drugs against either disease<sup>22</sup>. Thus,  
37  
38 145 data have suggested that the first-line anti-DM drug metformin could be a promising candidate  
39  
40  
41 146 for host-adjunctive anti-TB therapy, by reducing chronic inflammation and enhancing immune  
42  
43 147 response<sup>23</sup>.

44  
45  
46 148 Yet, other biological factors also contribute to poor TB/DM treatment outcomes including DM-  
47  
48 149 related alterations in drug absorption and metabolism resulting in sub-therapeutic anti-TB drug  
49  
50  
51 150 serum concentrations,<sup>24</sup> and altered inflammatory/anti-inflammatory host immune defences.  
52  
53 151 Furthermore, TB disease itself may worsen control of hyperglycaemia leading to uncontrolled  
54  
55 152 DM<sup>25</sup>. In turn, patients with uncontrolled DM also have higher bacterial burdens of *M.*  
56  
57  
58 153 *tuberculosis* and more extensive lung disease, and therefore achieving anti-TB drug  
59  
60 154 concentrations at the most optimal of levels may be even more important in patients with DM

1  
2 155 <sup>26,27</sup>. Yet, in our prior work in Tanzania, we found sub-therapeutic drug concentrations to occur  
3  
4 156 in the majority of all TB patients <sup>28,29</sup>. While international standards mention therapeutic drug  
5  
6 157 monitoring to guide TB/DM individualized dose adjustment<sup>30</sup>, few programmes from TB-endemic  
8  
9 158 settings have carried these recommendations forward<sup>31</sup>. Although the Tanzania Ministry of  
10  
11 159 Health recognizes the challenge of the TB/DM epidemic, the vast majority of health facilities have  
13  
14 160 not been able to implement international standards of TB/DM care. Therefore, this research  
15  
16 161 project will also take the opportunity to underpin implementation of the international standards  
17  
18  
19 162 for controlling the TB/DM in the health system and conduct applied research to answer critical  
20  
21 163 scientific questions of direct patient benefit while simultaneously training the next generation  
22  
23  
24 164 of health systems scientists.

25  
26 165 The overall aims of developing an ADEPT model is to strengthen the health systems by shifting  
27  
28  
29 166 traditional vertical programmes to a patient-centred adaptive diseases control approach  
30  
31 167 through integrating communicable and non-communicable diseases using the TB and DM dual  
32  
33  
34 168 epidemic as a case study in Tanzania. Integration of the TB/DM diagnosis and optimal  
35  
36 169 management strategies will be conducted in client-friendly clinical space near to patient's entry  
37  
38 170 into the health systems, as part of an adaptive disease control framework to inform future best  
39  
40  
41 171 policies for integrating care of communicable and NCDs in Tanzania.

## 42 43 172 **Overview of the ADEPT Model**

44  
45  
46 173 The ADEPT model has three components considered as vital to re-orient the health system to  
47  
48 174 address dual communicable and NCDs. Each component is described as follows;

- 49  
50  
51  
52 175 **I. A Step-wise Training approach: The objective is to improve knowledge, skills and**  
53  
54 176 **resource acquisition for the frontline health care providers to integrate communicable**  
55  
56 177 **and NCDs at varying health system levels.**

1  
2 178 This model follows the “classical diffusions of innovation theory” described elsewhere<sup>32</sup> and  
3  
4 179 organised on-job training in two clusters that will stepwise deliver a logically related set of  
5  
6 180 international standards of patients with communicable and NCDs. The first cluster consisting of  
7  
8  
9 181 mentors that train to integrate communicable and non-communicable diseases. The potential  
10  
11 182 mentors will be selected by the health managers at the respective health facilities, preferably  
12  
13  
14 183 working in either a general clinic or TB or DM clinic but also a minimum of undergraduate  
15  
16 184 training. This cluster will also then serve as subsequent mentors. The initial training is through  
17  
18  
19 185 the e-learning methodology and pre-defined proceeding criterion (score > 80% of the online  
20  
21 186 training) to the next phase which is a face-to-face workshop. The aim of the workshop is to  
22  
23  
24 187 expose individuals to acquire hands-on skills and conduct practical exercises related to clinical  
25  
26 188 services focusing on algorithms of management or nursing care and new endorsed technologies.  
27  
28  
29 189 The second cluster will receive training and mentorship from the first cluster. The first cluster  
30  
31 190 receives package/materials to train the second cluster working at the same level or at primary  
32  
33  
34 191 health care facilities.

35  
36  
37 192 **II. Adaptive service delivery. The objective is to integrate communicable and NCDs at**  
38  
39 193 **varying health system levels**

40  
41  
42  
43 194 Clinics delivering communicable or NCDs at varying levels of health facilities will receive training  
44  
45 195 using a step-wise model. Considerations of infection prevention control will guide a service  
46  
47  
48 196 delivery approach while considering patient-centred recommendations. The first clinic will be  
49  
50 197 applicable to clients with TB with or without other co-morbidities. Recognizing individuals with  
51  
52  
53 198 non-communicable lung diseases (CLDs) presenting with features akin of TB, a separate clinic  
54  
55 199 may need to be organized. For the TB and CLD clinics, although potentially operating separately,  
56  
57  
58 200 it is important to maintain the link of these clinics as an important component of practical  
59  
60 201 approach of lung health. The third clinic will encompass all non-TB-non-CLD with or without other

1  
2 202 comorbidities including HIV, DM, and Hypertension. A multimorbidity team within a health  
3  
4 203 facility will facilitate mechanisms for screening communicable and NCDs.  
5  
6  
7

8 204  
9  
10  
11  
12  
13  
14  
15  
16  
17  
18  
19  
20  
21  
22  
23  
24  
25  
26  
27  
28  
29  
30  
31  
32  
33  
34  
35  
36  
37  
38  
39  
40  
41  
42  
43  
44  
45  
46  
47  
48  
49  
50  
51  
52  
53  
54  
55  
56  
57  
58  
59  
60

For peer review only



1  
2 205  
3  
4  
5 206 **III. Learning system model: The objective is to create a platform for reviewing data and**  
6  
7 **information generated during implementation, and create a ‘self-repairing’ mechanism**  
8 207  
9  
10

11 208 The mentors or first cluster of trainees will have regular meetings at the Regional Medical  
12  
13 Officer with attendance of District Medical Officers and different programme coordinators;  
14 209  
15 including TB & Leprosy, NCDs, HIV, Malaria and Neglected Tropical Diseases. The meeting will  
16 210  
17 review the clinical audit and quality improvement reports from health facilities focusing on  
18 211  
19 health service delivery and identify the gaps for actions. Likewise, the coordinators will share  
20  
21 212  
22 on the expected national targets in their local context. The meeting report will be submitted  
23 213  
24 to the higher authorities responsible for health. Currently the report will be submitted to the  
25  
26 214  
27 Ministry of Health Community Development Gender Elderly and Children and the President  
28 215  
29 Office Regional Administration and Local Government Authority. The report will be included  
30  
31 216  
32 in the respective national technical working groups (TWG) for incorporation in the general  
33 217  
34 provision of technical direction and advice. The relay mechanisms from the TWG to regions  
35  
36 218  
37 will also be established.  
38 219  
39  
40

41  
42 220 **ADEPT Model Research Questions Component**  
43  
44

45 221 Implementation research  
46

- 47  
48 222 1. What patients did with dual TB and DM experience and what were their perspectives on  
49  
50 223 services they received in the health facilities?  
51  
52 224 2. What is/are the most effective approach/es to de-implement health facility practices  
53  
54 that do not support effective integration of proposed service delivery model using TB  
55 225  
56 and DM as a case study?  
57 226  
58  
59  
60 227

3. What is the best approach to deliver on-job training and facilitate delivery of integration of TB and DM in a patient-centred approach?
4. What is the feasibility, acceptability and fidelity of the implemented designed models?
5. Where is the best place in the HCS system to implement (or initiate) integration of TB and DM?

#### Operational research in TB and DM

1. How many additional dual TB and DM patients will be identified during bi-directional screening of TB and DM services who would otherwise not have been identified?
2. What are the treatment outcomes of patients with dual TB and DM with or without HIV compared to other patients without DM?
3. What are the effects of therapeutic drug monitoring on dose adjustment and subsequently on treatment outcomes?

### **METHODS AND ANALYSIS FOR ADEPT MODEL**

#### **Conceptual framework of the ADEPT model**

The ADEPT model pioneers the systems thinking methodology described by Swanson and colleagues to guide integrative changes in health practice, education, research and policy<sup>33</sup>.

We proposed to introduce ADEPT first to the dual TB/DM epidemic as a case study of integrating communicable and non-communicable diseases<sup>34,35</sup> to engage currently siloed policy makers, researchers, and service providers<sup>36</sup>. The proposed ADEPT model is supported by three principles with interdependent themes; transformational leadership, collaboration, and a constant interactive learning process prompting to self-repairing mechanisms. ADEPT will be evaluated using the logic framework developed by the WHO/US-Center for Diseases Control and Prevention (US-CDC) (Figure 2)<sup>37</sup>. The design of input and output pillars reflect largely on the archetypical work designed by Potters and Brought in 2004 for health system strengthening<sup>38</sup>. This includes a four-tier hierarchy with nine-interdependent elements as depicted in Figure 3.

1  
2 254 **Role, Structural and System capacity:** ADEPT will mobilize physicians and nurse officers working  
3  
4 255 at TB, DM, or general clinics at the regional level regardless of the facility level. The team will  
5  
6 256 serve as a Regional Technical Working Group (RTWG), and will be empowered to serve as  
7  
8  
9 257 mentors in the Region to support the health system to deliver best practices in patients with  
10  
11 258 dual communicable and NCDs. The formed team will operate under the Regional Medical Officer  
12  
13  
14 259 (RMO), a newly formed structure that will also link with the National Technical Working Groups  
15  
16 260 (NTWG) (Figure 1). RTWG under the leadership of RMO will conduct regular discussion with all  
17  
18  
19 261 stakeholders supporting the communicable and or NCDs intervention and associated co-  
20  
21 262 morbidities. The discussion emanating from the meetings will guide local decision but will also  
22  
23  
24 263 be communicated to the Ministries responsible for Health and Regional Administration and Local  
25  
26 264 Government Authorities, and shared with responsible NTWG for prioritization (Figure 1).  
27  
28  
29 265 The ADEPT consortium will meticulously and continuously explore gaps that will progressively  
30  
31 266 evolve the system toward people-centred health system<sup>39</sup>.  
32  
33  
34 267 **Staff and Personnel Training:** ADEPT has collaborated with National Training Centres and  
35  
36 268 hospitals/facilities that provide advanced/specialized care of patients in creating modules for  
37  
38 269 training of the front-line healthcare providers (HCPs). Leadership and supervisory lines will be  
39  
40  
41 270 strengthened simultaneously with increasing accountability and establishment of a clinical  
42  
43 271 audit programme. ADEPT has also created local technical working groups composed of senior  
44  
45  
46 272 front-line HCPs currently empowered with skills and knowledge for integrating and clinical  
47  
48 273 management of communicable (TB) and non-communicable (DM) diseases<sup>11</sup>. The  
49  
50  
51 274 empowerment of HPCs has been facilitated by those training modules delivered as web-based  
52  
53 275 or m-Health platforms for continuous professional development that has increased the reach  
54  
55 276 to all HCPs that would otherwise not be possible due to limited funds. The designed modules  
56  
57  
58 277 are not only adaptive to cover HCPs with different skills (for example, clinicians and nurses) but  
59  
60 278 modules can be updated remotely should new processes need to be introduced for instance

1  
2 279 emerging epidemics like COVID-19. Importantly, the HCPs have endless access and updated  
3  
4 280 alerts to their mobile numbers or emails prompting them to complete a new module.  
5

6 281 **Tools:** Equipment and consumables for piloting the programme have been inventoried at  
7  
8  
9 282 participating facilities within the communities of study. Supplies for DM were frequently not  
10  
11 283 available or inadequately stocked and these including glucometers, glucostrips, HbA1c devices,  
12  
13  
14 284 therapeutic drug monitoring supplies, recording and reporting. These tools were funded  
15  
16 285 temporarily through the Danish International Development Agency, subsequently health  
17  
18  
19 286 facilities will take over. TB consumables, supplies and tools were procured through conventional  
20  
21 287 channels including the cost sharing and implementing partners.  
22

## 23 288 **METHODS AND ANALYSIS FOR TB AND DM**

### 24 289 **Study design**

25  
26 289 This is a mixed research design and applies both qualitative and quantitative approaches. A cross  
27  
28  
29 290 sectional design will be conducted for needs assessment and bidirectional screening and  
30  
31 291 bidirectional screening of TB and DM while a prospective cohort design will be deployed for  
32  
33 292 assessing the treatment outcomes of patients with dual TB/DM. A stepped wedged cluster non-  
34  
35  
36 293 randomized trial design will be for assessing effect of therapeutic drug monitoring for dose  
37  
38 294 adjustment and subsequent treatment outcome of patients with dual TB/DM. Stepped-wedged  
39  
40  
41 295 methodology is a design that is preferably used when implementation and research go hand in  
42  
43 296 hand, especially with complex medical procedures this is a preferred approach.  
44  
45  
46 297  
47

48 298 A stepped wedge cluster randomised trial design is the most robust design that is logistically  
49  
50  
51 299 feasible whilst providing the level of evidence of efficacy and effectiveness to support further  
52  
53 300 implementation in health care<sup>40,41</sup>. This design helps to minimise ethical issues related to  
54  
55 301 withholding the optimized care in a traditional individual randomized trial design and can be  
56  
57  
58 302 considered of low or negligible risk.  
59

60 303

1  
2 304 **Study area**

3  
4 305 The research project will be conducted in three regions of Tanzania; Dar es Salaam, Iringa, and  
5  
6 306 Kilimanjaro. Districts that will participate include Ilala and Kigamboni for Dar es Salaam, Iringa  
7  
8  
9 307 Municipal, Kilolo and Mufindi for Iringa, and Moshi Municipal, Same and Siha for Kilimanjaro. We  
10  
11 308 selected areas to affiliate with the workplaces of the current consortium's Tanzanian expertise  
12  
13  
14 309 and to reflect representative population types. Dar es Salaam is largely a metropolitan while  
15  
16 310 Iringa and Kilimanjaro selected areas cover rural (Kilolo and Siha), semi-urban (Mufindi and  
17  
18  
19 311 Same) and urban settings (Iringa Municipal and Moshi Municipal). According to the National TB  
20  
21 312 survey of 2012, the TB prevalence is high in Dar es Salaam and in rural settings<sup>42</sup>. The burden of  
22  
23  
24 313 DM is 9% in Tanzania but is more common in urban settings<sup>43</sup>.

25  
26 314 **Study outline**

27  
28  
29 315 **Objective 1 method: Integrate TB or TB/HIV and DM services**

30  
31 316 A prospective cohort study of the health system will be conducted to observe the effect of the  
32  
33 317 step-down approach and integration of services. It is recommended that at least 30 health  
34  
35  
36 318 facilities are needed for reliable and accurate results therefore each region will contribute at  
37  
38 319 least 10 health facilities at various levels for integrating TB or TB/HIV and DM services <sup>44</sup>. The  
39  
40  
41 320 catchment area includes one- referral hospital, three district hospitals and at least 6 health  
42  
43 321 centres/dispensaries. Integration will start stepwise from the referral (secondary or tertiary)  
44  
45  
46 322 hospitals levels; corresponding with the stepwise training model towards primary health care  
47  
48 323 clinics, i.e. the district hospitals followed by the health centres and dispensaries. Needs  
49  
50  
51 324 assessments have been carried to identify capacity of the health facility and decide whether the  
52  
53 325 health facility will operate as a "one-stop shop" defined as TB and DM services provided at the  
54  
55 326 same time using adjacent rooms, "partial integration" defined as health care providers swaps  
56  
57  
58 327 between clinics, or "remote integration" through cross referral of DM to TB services. Entries of  
59  
60 328 TB/DM integration in TB services or TB/HIV services will be at the TB and DM clinics <sup>45</sup>. People

1  
2 329 diagnosed with TB diagnosed will receive DM testing while at the DM clinics, presumed TB will  
3  
4 330 be screened according to the standard national TB algorithm. An algorithm to identify people  
5  
6 331 with active TB and high potential for treatment failure, including those with TB drug resistance  
7  
8  
9 332 and other DM co-morbidities, will be identified and tabled for expert discussion of additional  
10  
11 333 support mechanisms that can be mobilized. Participants will be managed according to the  
12  
13  
14 334 collaborative TB/DM services framework guideline<sup>46</sup> as follows;

15  
16  
17 335 **Sub-objective 1.1. Method. Screening TB in DM patients**

18  
19  
20 336 People with DM, especially those with sub-optimal control as defined by HbA1c, will be screened  
21  
22 337 for active TB. The algorithms for active TB will be applied as described elsewhere<sup>47 48</sup>.

23  
24  
25 338 **Sub-objective 1.2. Method. Screening DM in TB patients**

26  
27  
28 339 All people with active TB irrespective of having “classical” symptoms (polyuria, polydipsia and  
29  
30 340 polyphagia) will be screened with glucometer and interpretation of results is as follows; if the  
31  
32 341 random blood/serum glucose (RBG)  $\leq 7.8$  mmol/L or fasting blood glucose (FBG)  $\leq 6.1$  mmol/L  
33  
34  
35 342 without DM symptoms, blood or serum glucose will be considered normal. If the RBG is 7.8 – 11.0  
36  
37 343 mmol/L or FBG is 6.2 – 6.9 mmol/L, this will be considered as pre-DM. When RBG is  $\geq 11$ mmol/L or  
38  
39  
40 344 FBG is  $\geq 7.0$  mmol/L this is DM<sup>49</sup>. To exclude patients with transient hyperglycaemia due to  
41  
42 345 cytokine stimulation (false DM diagnosis), Hb1Ac will be performed in follow-up<sup>25</sup>. Individuals  
43  
44  
45 346 with pre-DM or DM further tested with HbA1c, interpretation of the results will be as follows;  
46  
47 347 HbA1c of  $\leq 38$  mmol/mol ( $\leq 5.6\%$ );  $39 < 48$  mmol/mol ( $5.7\% < 6.5\%$ ), and  $\geq 48$  mmol/mol ( $\geq 6.5\%$ ) will  
48  
49  
50 348 be reported and considered as normal, pre-DM and DM respectively<sup>50</sup>. People with active TB and  
51  
52 349 pre-DM will be re-evaluated in the mid-term of TB treatment and TB treatment completion to  
53  
54  
55 350 identify if the condition has resolved, progressed, or remained static; if pre-DM will have  
56  
57 351 advanced to DM, patients will be treated according to the DM guideline. The TB Infection  
58  
59  
60 352 Prevention Control practice that is applicable in HIV clinics will be applied<sup>45</sup>.



1  
2 353 **Objective 2 methods: Determine effect of diagnostics (HbA1c and therapeutic drug monitoring)**  
3  
4 354 **for regimen and dosage selection for optimizing treatment outcomes of patients with dual**  
5  
6  
7 355 **TB/DM**

8  
9 356 Health facilities effectively integrating dual TB/DM services will enter a next phase of using  
10  
11 357 therapeutic drug monitoring for personalized dose adjustment to optimize dual TB/DM patient  
12  
13 management (Figure 4). The implementation study design will describe the outcomes of patients  
14 358 with dual TB/DM tested with diagnostics comprising of susceptibility testing, anti-TB therapeutic  
15  
16 359 drug monitoring, and HbA1c for monitoring the DM and guide selection and combination of both  
17  
18 360 anti-TB and anti-DM drugs. The stepped wedge trial design will be used for assessing the effect  
19  
20 361 of therapeutic drug monitoring will have 3-phases: pre-enrolment phases where prior to  
21  
22 362 implementation of all facilities will serve as controls; roll-out period when health facilities cross-  
23  
24 363 over from control to active implementing the therapeutic drug monitoring (TDM); post-rollout  
25  
26 364 when all selected health facilities will be implementing TDM.

27  
28 366 Health facilities in each region integrating TB/DM services will be allocated; to incorporate the  
29  
30 367 therapeutic drug monitoring in optimizing anti-TB drug dosages. In our previous observational  
31  
32 368 study, we found 16% of TB/DM patients had unfavourable outcomes in Tanzania <sup>19</sup>. We assume  
33  
34 369 that the therapeutic drug monitoring will reduce the unfavourable event rate to 8%. To achieve  
35  
36 370 90% power to detect this difference with a significance level of 5% with a non-compliance  
37  
38 371 estimated at 8% <sup>51</sup>, the adjusted minimum sample size of 970 TB/DM patients will be rigorously  
39  
40 372 followed <sup>52</sup>. TB/DM or TB-HIV/DM individuals will provide baseline sputum for culture and drug  
41  
42 373 susceptibility testing as well as smear microscopy. Patients will also test for HbA1c and renal  
43  
44 374 function test to assess for severity of DM. Two weeks after starting anti-TB medication, blood  
45  
46 375 will be collected for therapeutic drug monitoring of anti-TB drugs. Collection of blood will be  
47  
48 376 through dry blood spot and transported to the Biotechnology Laboratory/Kilimanjaro Clinical  
49  
50  
51  
52  
53  
54  
55  
56  
57  
58  
59  
60 377 Research Institute through Expedited Mail Services. The dry blood spot collection will be



1  
2 378 processed for testing the serum drug levels starting first with rifampicin using an assay validated  
3  
4 379 according to international guidelines<sup>53</sup> Results will be communicated before day 21 of anti-TB  
5  
6 380 treatment, and if needed the anti-TB dosage adjustment will be made. A TDM strategy suitable  
7  
8  
9 381 for a fixed dose combination regimen will be applied. In summary, the therapeutic drug  
10  
11 382 monitoring will be performed at week 2 of TB treatment, and based on plasma concentrations  
12  
13 383 results, the appropriate FDC tablets can be selected<sup>54,55</sup>. Serum drug exposure that differs by at  
14  
15  
16 384 least 25% from target concentrations will be considered as clinically relevant <sup>56</sup>. Therefore, those  
17  
18  
19 385 below the target will be eligible for dose adjustment. Two weeks after dose adjustment, the new  
20  
21 386 drug concentrations will be assayed and determined if having met target<sup>54</sup>. In the continuation  
22  
23 387 phase, the appropriate fixed drug combination of rifampicin and isoniazid can be selected, based  
24  
25  
26 388 on earlier measured drug concentrations. In addition, routine pharmaco-vigilance will  
27  
28  
29 389 complement the safety data of this strategy. TB/DM cases will have monthly mycobacteriological  
30  
31 390 monitoring for detection of microbiological treatment failure. While DM monitoring will include  
32  
33 391 the assessment of retinopathy, impaired wound healing (diabetic foot), and nephropathy<sup>57,58</sup>.  
34  
35  
36 392 HbA1c and renal function tests will also be followed at month 3 and 6 to enable further anti-DM  
37  
38 393 regimen adjustment.

### 41 394 **Objective 3 methods: Capacity building on training and applied research**

42  
43 395 Training of the frontline health care providers will follow the “*classical diffusions of innovation*  
44  
45 396 *theory*” drawn by Dearing (2009) [REF]. ADEPT will change the current passive delivery of  
46  
47  
48 397 international standards of care into an active approach, and the training will be delivered in a  
49  
50  
51 398 step-wise approach and will be implemented in phases;

- 52  
53  
54 399     ▪ Phase 1- includes a self-learning package for TB and DM and associated comorbidities  
55  
56 400         contents with assessment delivered through a web-based platform. The assessment will  
57  
58  
59 401         be shared to the ADEPT team prior to attending the next phase.  
60

- 1  
2 402     ▪ Phase 2- Learners achieving > 80% of the web-based assessment will be invited to attend  
3  
4 403     training of the trainer (ToT) workshop. Emphasis during this phase will be to expose  
5  
6 404     individuals to acquire the principles, of the technology or innovations or intervention and  
7  
8  
9 405     conduct practical on dual TB/DM and associated co-morbidities including HIV-coinfection,  
10  
11 406     malnutrition and non-communicable chronic lung diseases.
- 12  
13  
14 407     ▪ Phase 3- ToT will receive package/materials to train frontline health service providers in  
15  
16 408     their district. This will be the minimum package for providing dual TB and DM care with  
17  
18  
19 409     short modules and directives to the task to be conducted. ToT will deliver the training to  
20  
21 410     the selected health facilities assigned to him/her.
- 22  
23  
24 411     ▪ Phase 4- Competency of the ToT will combine assessment of best practice portfolio  
25  
26 412     documented at their clinics, and also practice implemented by the trainers s/he  
27  
28  
29 413     empowered.

30  
31  
32 414     Medical education modules on TB/DM and associated comorbidities will be tailored to different  
33  
34  
35 415     roles and associated quality control questions for assessing the level of acquired skills for each  
36  
37 416     type of health care provider (clinicians, nurses, pharmacist and laboratory staff). A minimum  
38  
39  
40 417     threshold of quality control pass will be included as one of the criteria to qualify the health facility  
41  
42 418     to integrate TB/DM services. Other criteria will be sought from the health facility needs  
43  
44  
45 419     assessment tools, which will include availability, and operational infection prevention policy for  
46  
47 420     TB controls and equipment for DM diagnosis and prevention of complications. Knowledge  
48  
49 421     comparison will be made pre- and post-training.

#### 50 51 422     **Data collection**

52  
53  
54 423     Data collection will be done under routine patient care in clinics. Data management will follow  
55  
56  
57 424     and adhere to the Tanzania Code of Conduct for Research Integrity. Qualitative data will be  
58  
59 425     summarized in qualitative case record forms while quantitative data will be available in the Multi-  
60  
426     Schema Information Capture database, which is a customizable format current in use in

1  
2 427 Kilimanjaro, utilizing secure encryption services (www.mysql.com). Data collection, transfer,  
3  
4 428 entry, validation, queries generation, audit, archival and ownership will be detailed in specific  
5  
6  
7 429 standard operational procedures as described elsewhere<sup>59</sup>.

### 9 430 **Data analysis plan on dual TB and DM**

10  
11 431 Outcome measures include;

12  
13  
14 432 Bidirectional screening and diagnosis of dual TB/DM disease

- 15  
16  
17  
18 433 • Proportion of health facilities capable of providing best practice of TB/DM services at  
19  
20 434 varying levels
- 21  
22 435 • Proportion of laboratories supporting dual TB/DM services
- 23  
24  
25 436 • Proportion of health care providers trained in best practice on dual TB/DM services
- 26  
27 437 • Proportion of registered TB patients screened for DM
- 28  
29  
30 438 • Proportion of diabetes patients screened for TB
- 31  
32 439 • Proportion of registered TB patients identified with presumptive DM among patients  
33  
34  
35 440 and screened for DM and vice versa
- 36  
37 441 • Proportion of registered TB patients tested for DM and vice versa.
- 38  
39  
40 442 • Proportion of registered TB patients diagnosed with DM and vice versa.
- 41  
42 443 • Proportion of registered DM patients with TB referred to a TB clinic.
- 43  
44  
45 444 • Proportion of registered DM patients with TB started on TB treatment and vice versa.

### 46 47 48 445 **Dual TB/DM treatment outcomes**

#### 49 50 51 446 TB treatment outcomes

- 52  
53 447 • Proportion of TB/diabetes patients with favourable outcomes (cured, or treatment  
54  
55 448 complete) or unfavourable outcomes (death, lost to follow-up, treatment failure)
- 56  
57  
58 449 • Proportion of TB/DM recurrence of TB one year after completion TB treatment as  
59  
60 450 determined by sputum culture and advanced genomic technologies.

- 1  
2 451 • Proportion of TB/DM acquiring DR-TB at the time of failure or TB recurrence  
3  
4 452 • Proportion of TB/DM patients with sub-optimal concentrations of first line anti-TB drugs  
5  
6  
7 453 at 2nd-week of treatment  
8  
9 454 • Proportion of TB/DM with abnormal HbA1c compared to the baseline  
10  
11  
12 455 • Proportion of TB/DM patients with treatment adjustment  
13

14 456 DM complications at baseline and at the end of TB treatment  
15

- 16  
17 457 • Proportion of TB/DM with hypertension, kidney dysfunction as estimated by the  
18  
19 458 albuminuria/proteinuria, blood urea nitrogen and creatinine  
20  
21  
22 459 • Proportional of TB/DM with neuropathy through assessment of bladder or erectile (male)  
23  
24 460 dysfunction, sensorimotor neuropathy, orthostatic hypotension, sudomotor neuropathy,  
25  
26 461 frequent non-infective diarrhoea or constipation  
27  
28  
29 462 • Proportional of TB/DM with retinopathy as graded by severity (none, mild, moderate or  
30  
31 463 severe)  
32  
33

34 464 We will assess the pathway of patients' experience and acceptability of dual TB/DM services  
35  
36 465 <sup>60</sup>.Likewise we will assess the feasibility and acceptability of all steps of ADEPT model as  
37  
38  
39 466 portrayed in Figure 2.  
40

41 467 **PATIENT AND PUBLIC INVOLVEMENT**  
42

43  
44 468 Development of this protocol was informed by series of research studies that included one study  
45  
46 469 that examined patients experience of health services in the health facilities<sup>9</sup>. Findings from the  
47  
48  
49 470 described research objectives will be shared with patients' organizations subsequently  
50  
51 471 contribute in shaping the agenda of effective integration of communicable and non-  
52  
53 472 communicable diseases  
54

55  
56 473 **ETHICS AND DISSEMINATION**  
57

58 474 This protocol has been approved at the local health research committee serving Kibong'oto  
59  
60  
475 Infectious Diseases Hospital and National Health Research Committee with reference numbers

1  
2 476 KNCHREC003 and NIMR/HQ/R.8a/Vol.IX/2988, respectively. Furthermore, the Ministries of  
3  
4 477 Health and Regional Administrative & Local Government Authority have endorsed  
5  
6  
7 478 implementation of this protocol.

#### 8 9 479 **AUTHOR CONTRIBUTIONS**

10  
11 480 SGM, DLC, KR and ICB conceptualized and designed the model and proposal. TL, SH, JWA and  
12  
13  
14 481 MSB contributed in the design of the concept particularly in TB/DM research component  
15  
16 482 including Mycobacteriology, TDM and mHealth respectively. DLC obtained the funding for the  
17  
18  
19 483 ADEPT project from the Ministry of Foreign Affairs of Denmark. SGM lead the implementation of  
20  
21 484 the protocol in Tanzania while KR, and MSB lead implementation of the stepwise model. NEN  
22  
23  
24 485 co-lead the implementation in Iringa. BTM co-lead implementation of the TDM in Tanzania  
25  
26 486 together with SH and JWA. All authors provided technical inputs in the proposal. SGM wrote the  
27  
28  
29 487 manuscript with input from all the authors. All authors have approved the final version and  
30  
31 488 agreed to be accountable for all aspects of the work related to accuracy and integrity.

#### 32 33 489 **FUNDING STATEMENT**

34  
35  
36 490 This study is funded by the Danish Ministry of Foreign Affairs (DFC File No. 17-03-KU).

#### 37 38 491 **DATA STATEMENT**

39  
40  
41 492 The data sets that will be generated and analysed during the conduct of the study will be made  
42  
43 493 available according to the available laws and regulations  
44  
45  
46 494

1  
2 495 **ACKNOWLEDGEMENT**

3  
4 496 The authors thank Professor Flemming Konradsen, University of Copenhagen, Denmark for his  
5  
6 497 valuable comments on the research study

8  
9 498 **FIGURES LEGEND**

10  
11 499 Figure 1: This model will break the siloed policy makers, health providers and researchers and  
12  
13 gradually transform the health system into a proactive self-organizing or self-repairing system.  
14 500  
15  
16 501 Essential elements (Performance, Instance Selection, Critique, and Learning), if operated  
17  
18 effectively will form an adaptive learning system. The proposed TB/DM-ADEPT Model will  
19 502  
20  
21 503 interconnect all interactive elements through: (a) Setting a regular single platform for policy  
22  
23 makers, researchers and service providers on TB/DM epidemic agenda (Learning element); (b)  
24 504  
25  
26 505 Implementing international standards of dual TB and DM care through integrative TB/DM  
27  
28 collaborative services that will facilitate early diagnosis while providing individualized treatment  
29 506  
30  
31 507 of patients with dual TB/DM disease (Performance element); (c) Conduct TB/DM applied  
32  
33 research in implementation and health system research science to determine how to deliver best  
34 508  
35  
36 509 practices that will enable a people-centred health system (Critique element); and (d) Train PhD  
37  
38 510 and postdoctoral fellows to answer dual TB/DM health system challenges to strengthen applied  
39  
40 research capacity and hands-on skills to create a critical mass of the next generation of scientists  
41 511  
42  
43 512 able to scale up TB/DM interventions and adapt to study other communicable/ non-  
44  
45 communicable disease intersections (Instance Selection element).

46 513  
47  
48 514 Figure 2: Logic framework model for measuring outcomes and impact

49  
50 515 Figure 3: Hierarchy of needs for strengthening the health system as described by Potter &  
51  
52 Brough<sup>34</sup>

53 516  
54  
55 517 Figure 4: Introduction of integration of TB/DM services thereafter stepwise introduction of  
56  
57 packages comprises of susceptibility, therapeutic drug monitoring, HbA1c for optimal TB/DM  
58 518  
59  
60 519 case management at all levels of health facilities

1  
2 520  
3  
4 521  
5  
6  
7 522  
8  
9 523  
10  
11  
12 524  
13  
14 525  
15 526  
16 527  
17 528  
18 529  
19 530  
20 531  
21 532  
22 533  
23 534  
24 535  
25 536  
26 537  
27 538  
28 539  
29 540  
30 541  
31 542  
32 543  
33 544  
34 545  
35 546  
36 547  
37 548  
38 549  
39 550  
40 551  
41 552  
42 553  
43 554  
44 555  
45 556  
46 557  
47 558  
48 559  
49 560  
50 561  
51 562  
52 563  
53 564  
54 565  
55 566  
56 567  
57 568  
58 569  
59 570  
60

## COMPETING INTEREST STATEMENT:

None declared.

## REFERENCES

- 1 Institute for Health Metrics and Evaluation (IHME). Global Burden of Diseases (GBD) Profile;Tanzania, 2010.
- 2 Commission on Global Health Risk Framework for the Future (GHRF). Accelerating Research and Development to Counter the Threat of Infectious Diseases. The Neglected Dimension of Global Security: A Framework to Counter Infectious Disease Crises. Washington (DC)2016.
- 3 Ministry of Health. Ministry of Health -Tanzania. Health Sector Strategic Plan IV (2015-2020), 2015.
- 4 Bryan, L., Conway, M., Keesmaat, T., McKenna, S. & Richardson, B. Strengthening sub-Saharan Africa's health systems: A practical approach | McKinsey & Company. *Health Systems & Services*, 1-11 (2010).
- 5 Mpagama, S. G. *et al.* Diagnosis and interim treatment outcomes from the first cohort of multidrug-resistant tuberculosis patients in Tanzania. *PLoS One* **8**, e62034, doi:10.1371/journal.pone.0062034 (2013).
- 6 Liyoyo, A. *et al.* Gridlock from diagnosis to treatment of Multidrug-Resistant Tuberculosis (MDR-TB) in Tanzania: Illuminating Potential Factors for Possible Intervention. *East African Health Research Journal* **1** (2017).
- 7 Mpagama, S. G. *et al.* Gridlock from diagnosis to treatment of multidrug resistant tuberculosis (MDR-TB) in Tanzania: Patients perspectives from the focus group discussion. *bioRxiv pre print* doi: <http://dx.doi.org/10.1101/402594> , doi:10.1101/402594 (2018).
- 8 Mpagama, S. G. *et al.* Gridlock from diagnosis to treatment of multidrug-resistant tuberculosis in Tanzania: low accessibility of molecular diagnostic services and lack of healthcare worker empowerment in 28 districts of 5 high burden TB regions with mixed methods evaluation. *BMC Public Health* **19**, doi:10.1186/s12889-019-6720-6 (2019).
- 9 Mpagama, S. G. *et al.* Gridlock from diagnosis to treatment of multidrug resistant tuberculosis (MDR-TB) in Tanzania: patients' perspectives from a focus group discussion. *BMC Public Health* **20**, 1667, doi:10.1186/s12889-020-09774-3 (2020).
- 10 Harries, A. D. *et al.* Defining the research agenda to reduce the joint burden of disease from diabetes mellitus and tuberculosis. *Trop Med Int Health* **15**, 659-663, doi:10.1111/j.1365-3156.2010.02523.x (2010).
- 11 Shayo, F. K. & Shayo, S. C. Availability and readiness of diabetes health facilities to manage tuberculosis in Tanzania: a path towards integrating tuberculosis-diabetes services in a high burden setting? *BMC Public Health* **19**, 1104, doi:10.1186/s12889-019-7441-6 (2019).
- 12 Chang, A. Y. *et al.* Chronic multimorbidity among older adults in rural South Africa. *BMJ Glob Health* **4**, e001386, doi:10.1136/bmjgh-2018-001386 (2019).
- 13 Workneh, M. H., Bjune, G. A. & Yimer, S. A. Prevalence and associated factors of tuberculosis and diabetes mellitus comorbidity: A systematic review. *PLoS One* **12**, e0175925, doi:10.1371/journal.pone.0175925 (2017).



- 1  
2 563 14 Jeon, C. Y. & Murray, M. B. Diabetes mellitus increases the risk of active tuberculosis: a  
3 564 systematic review of 13 observational studies. *PLoS Med* **5**, e152,  
4 565 doi:10.1371/journal.pmed.0050152 (2008).
- 5 566 15 Faurholt-Jepsen, D. *et al.* Diabetes is a risk factor for pulmonary tuberculosis: a case-  
6 567 control study from Mwanza, Tanzania. *PLoS One* **6**, e24215,  
8 568 doi:10.1371/journal.pone.0024215 (2011).
- 9 569 16 Bali. in *Stopping a looming Co-epidemic: A global Summit on Diabetes and Tuberculosis*.  
10 570 17 Kapur, A., Harries, A. D., Lönnroth, K., Wilson, P. & Sulistyowati, L. S. Diabetes and  
11 571 tuberculosis co-epidemic: the Bali Declaration. *The Lancet Diabetes & Endocrinology* **4**, 8-  
12 572 10, doi:10.1016/s2213-8587(15)00461-1 (2016).
- 14 573 18 Sariko, M. L. *et al.* Glycated hemoglobin screening identifies patients admitted for  
15 574 retreatment of tuberculosis at risk for diabetes in Tanzania. *J Infect Dev Ctries* **10**, 423-426,  
16 575 doi:10.3855/jidc.7324 (2016).
- 18 576 19 Faurholt-Jepsen, D. *et al.* Diabetes is a strong predictor of mortality during tuberculosis  
19 577 treatment: a prospective cohort study among tuberculosis patients from Mwanza,  
20 578 Tanzania. *Trop Med Int Health* **18**, 822-829, doi:10.1111/tmi.12120 (2013).
- 21 579 20 Workneh, M. H., Bjune, A. G. & Yimer, S. A. Diabetes mellitus is associated with increased  
22 580 mortality during tuberculosis treatment: a prospective cohort study among tuberculosis  
23 581 patients in South-Eastern Amahra Region, Ethiopia. *Infectious Diseases of Poverty* **5**, 10,  
25 582 doi:10.1186/s40249-016-0115-z (2016).
- 26 583 21 Harries, A. D. *et al.* Addressing diabetes mellitus as part of the strategy for ending TB. *Trans*  
27 584 *R Soc Trop Med Hyg* **110**, 173-179, doi:10.1093/trstmh/trv111 (2016).
- 29 585 22 Singhal, A. *et al.* Metformin as adjunct antituberculosis therapy. *Sci Transl Med* **6**,  
30 586 263ra159, doi:10.1126/scitranslmed.3009885 (2014).
- 31 587 23 Park, S. *et al.* Metformin and tuberculosis risk in elderly patients with diabetes mellitus. *Int*  
32 588 *J Tuberc Lung Dis* **23**, 924-930, doi:10.5588/ijtld.18.0687 (2019).
- 33 589 24 Heysell, S. K., Moore, J. L., Keller, S. J. & Houpt, E. R. Therapeutic drug monitoring for slow  
34 590 response to tuberculosis treatment in a state control program, Virginia, USA. *Emerg Infect*  
36 591 *Dis* **16**, 1546-1553, doi:10.3201/eid1610.100374 (2010).
- 37 592 25 Aftab, H. *et al.* Tuberculosis-Related Diabetes: Is It Reversible after Complete Treatment?  
38 593 *Am J Trop Med Hyg* **97**, 1099-1102, doi:10.4269/ajtmh.16-0816 (2017).
- 39 594 26 Wang, J. Y. *et al.* Optimal duration of anti-TB treatment in patients with diabetes: nine or  
40 595 six months? *Chest* **147**, 520-528, doi:10.1378/chest.14-0918 (2015).
- 42 596 27 Chiang, C. Y. *et al.* The influence of diabetes, glycemic control, and diabetes-related  
43 597 comorbidities on pulmonary tuberculosis. *PLoS One* **10**, e0121698,  
44 598 doi:10.1371/journal.pone.0121698 (2015).
- 46 599 28 Heysell, S. *et al.* Plasma drug activity assay for treatment optimization in tuberculosis  
47 600 patients. *Antimicrobial agents and chemotherapy* **55**, 5819-5825, doi:10.1128/AAC.05561-  
48 601 11 (2011).
- 49 602 29 Tostmann, A. *et al.* Pharmacokinetics of first-line tuberculosis drugs in Tanzanian patients.  
50 603 *Antimicrob Agents Chemother* **57**, 3208-3213, doi:10.1128/AAC.02599-12 (2013).
- 52 604 30 Nahid, P. *et al.* Official American Thoracic Society/Centers for Disease Control and  
53 605 Prevention/Infectious Diseases Society of America Clinical Practice Guidelines: Treatment  
54 606 of Drug-Susceptible Tuberculosis. *Clinical infectious diseases : an official publication of the*  
55 607 *Infectious Diseases Society of America* **63**, e147-195, doi:10.1093/cid/ciw376 (2016).
- 56 608 31 Ghimire, S. *et al.* Incorporating therapeutic drug monitoring into the World Health  
57 609 Organization hierarchy of tuberculosis diagnostics. *The European respiratory journal* **47**,  
59 610 1867-1869, doi:10.1183/13993003.02142-2015 (2016).
- 60 611 32 Dearing, J. W. Applying Diffusion of Innovation Theory to Intervention Development. *Res*  
612 *Soc Work Pract* **19**, 503-518, doi:10.1177/1049731509335569 (2009).

- 1  
2 613 33 Swanson, R. C. *et al.* Rethinking health systems strengthening: key systems thinking tools  
3 614 and strategies for transformational change. *Health Policy Plan* **27 Suppl 4**, iv54-61,  
4 615 doi:10.1093/heapol/czs090 (2012).
- 5 616 34 Alkabab, Y. *et al.* Early interventions for diabetes related tuberculosis associate with  
6 617 hastened sputum microbiological clearance in Virginia, USA. *BMC Infect Dis* **17**, 125,  
8 618 doi:10.1186/s12879-017-2226-y (2017).
- 9 619 35 Lo, H.-Y. *et al.* Does enhanced diabetes management reduce the risk and improve the  
10 620 outcome of tuberculosis? *Int J Tuberc Lung Dis* **20**, 376-382, doi:0.5588/ijtld.15.0654  
11 621 (2016).
- 13 622 36 Lönnroth, K., Roglic, G. & Harries, A. D. Improving tuberculosis prevention and care through  
14 623 addressing the global diabetes epidemic: from evidence to policy and practice. *The Lancet*  
15 624 *Diabetes & Endocrinology* **2**, 730-739, doi:10.1016/s2213-8587(14)70109-3 (2014).
- 16 625 37 De-Regil, L. M., Pena-Rosas, J. P., Flores-Ayala, R. & del Socorro Jefferds, M. E.  
17 626 Development and use of the generic WHO/CDC logic model for vitamin and mineral  
18 627 interventions in public health programmes. *Public Health Nutr* **17**, 634-639,  
20 628 doi:10.1017/S1368980013000554 (2014).
- 21 629 38 Potter, C. & Brough, R. Systemic capacity building: a hierarchy of needs. *Health Policy Plan*  
22 630 **19**, 336-345, doi:10.1093/heapol/czh038 (2004).
- 24 631 39 Hales, S. *et al.* Reporting guidelines for implementation and operational research. *Bull*  
25 632 *World Health Organ* **94**, 58-64, doi:10.2471/BLT.15.167585 (2016).
- 26 633 40 Martson, A. G. *et al.* How to design a study to evaluate therapeutic drug monitoring in  
27 634 infectious diseases? *Clin Microbiol Infect* **26**, 1008-1016, doi:10.1016/j.cmi.2020.03.008  
28 635 (2020).
- 30 636 41 Hemming, K., Haines, T. P., Chilton, P. J., Girling, A. J. & Lilford, R. J. The stepped wedge  
31 637 cluster randomised trial: rationale, design, analysis, and reporting. *BMJ* **350**, h391,  
32 638 doi:10.1136/bmj.h391 (2015).
- 33 639 42 Senkoro, M. *et al.* Prevalence of pulmonary tuberculosis in adult population of Tanzania: a  
34 640 national survey, 2012. *Int J Tuberc Lung Dis* **20**, 1014-1021, doi:10.5588/ijtld.15.0340  
36 641 (2016).
- 37 642 43 Ministry of Health. Tanzania Non Communicable Diseases (NCD) Prevention and Control  
38 643 Program. Guidance on provision of NCD and mental health services in the context of  
39 644 COVID-19 outbreak in Tanzania. (2020).
- 41 645 44 WHO. in *Action Programme on Essential Drugs* Vol. WHO/DAP/93.1 (1993).
- 42 646 45 Riza, A. L. *et al.* Clinical management of concurrent diabetes and tuberculosis and the  
43 647 implications for patient services. *The Lancet Diabetes & Endocrinology* **2**, 740-753,  
44 648 doi:10.1016/s2213-8587(14)70110-x (2014).
- 46 649 46 WHO. (ed World Health Organization Stop TB Department and Department of Chronic  
47 650 Diseases and Health Promotion, Geneva, Switzerland and The International Union Against  
48 651 Tuberculosis and Lung Diseases Paris France) (2011).
- 49 652 47 Mave, V. *et al.* Tuberculosis screening among persons with diabetes mellitus in Pune, India.  
50 653 *BMC Infect Dis* **17**, 388, doi:10.1186/s12879-017-2483-9 (2017).
- 52 654 48 Byashalira, K. *et al.* Clinical outcomes of new algorithm for diagnosis and treatment of  
53 655 Tuberculosis sepsis in HIV patients. *International Journal of Mycobacteriology* **8**,  
54 656 doi:10.4103/ijmy.ijmy\_135\_19 (2019).
- 55 657 49 The United Republic of Tanzania:Ministry of Health, Community Development, Gender,  
56 658 Elderly and Children:National Guidelines for Collaborative Care and Control of Tuberculosis  
58 659 and Diabetes. (2016).
- 59 660 50 van Crevel, R., Koesoemadinata, R., Hill, P. C. & Harries, A. D. Clinical management of  
60 661 combined tuberculosis and diabetes. *Int J Tuberc Lung Dis* **22**, 1404-1410,  
662 doi:10.5588/ijtld.18.0340 (2018).

- 1  
2 663 51 Sealed Envelope Ltd. Power calculator for continuous outcome superiority trial: Accessed  
3 664 on 2017. <https://www.sealedenvelope.com/power/continuous-superiority/> [Accessed Wed  
4 665 Dec 21 2016].) (2012).
- 5 666 52 Boeree, M. J. *et al.* High-dose rifampicin, moxifloxacin, and SQ109 for treating tuberculosis:  
6 667 a multi-arm, multi-stage randomised controlled trial. *The Lancet Infectious Diseases*,  
8 668 doi:10.1016/s1473-3099(16)30274-2 (2016).
- 9 669 53 Capiou, S. *et al.* Official International Association for Therapeutic Drug Monitoring and  
10 670 Clinical Toxicology Guideline. *Therapeutic Drug Monitoring* **41**, 409-430,  
11 671 doi:10.1097/ftd.0000000000000643 (2019).
- 13 672 54 van der Burgt, E. P. *et al.* End TB with precision treatment! *Eur Respir J* **47**, 680-682,  
14 673 doi:10.1183/13993003.01285-2015 (2016).
- 15 674 55 Zuur, M. A. *et al.* Fixed-dose combination and therapeutic drug monitoring in tuberculosis:  
16 675 friend or foe? *Eur Respir J* **48**, 1230-1233, doi:10.1183/13993003.00833-2016 (2016).
- 18 676 56 Alffenaar, J. C. *et al.* Integrating Pharmacokinetics and Pharmacodynamics in Operational  
19 677 Research to End Tuberculosis. *Clin Infect Dis* **70**, 1774-1780, doi:10.1093/cid/ciz942 (2020).
- 20 678 57 Prada-Medina, C. A. *et al.* Systems Immunology of Diabetes-Tuberculosis Comorbidity  
21 679 Reveals Signatures of Disease Complications. *Sci Rep* **7**, 1999, doi:10.1038/s41598-017-  
22 680 01767-4 (2017).
- 24 681 58 Kumar, N. P. *et al.* Tuberculosis-diabetes co-morbidity is characterized by heightened  
25 682 systemic levels of circulating angiogenic factors. *J Infect* **74**, 10-21,  
26 683 doi:10.1016/j.jinf.2016.08.021 (2017).
- 27 684 59 Martin, D. L. *et al.* Data collection, processing, validation, and verification. *Health Phys* **95**,  
28 685 36-46, doi:10.1097/01.HP.0000298817.72107.48 (2008).
- 30 686 60 Hammarberg, K., Kirkman, M. & de Lacey, S. Qualitative research methods: when to use  
31 687 them and how to judge them. *Hum Reprod* **31**, 498-501, doi:10.1093/humrep/dev334  
32 688 (2016).  
33 689  
34  
35  
36 690  
37  
38  
39  
40  
41  
42  
43  
44  
45  
46  
47  
48  
49  
50  
51  
52  
53  
54  
55  
56  
57  
58  
59  
60

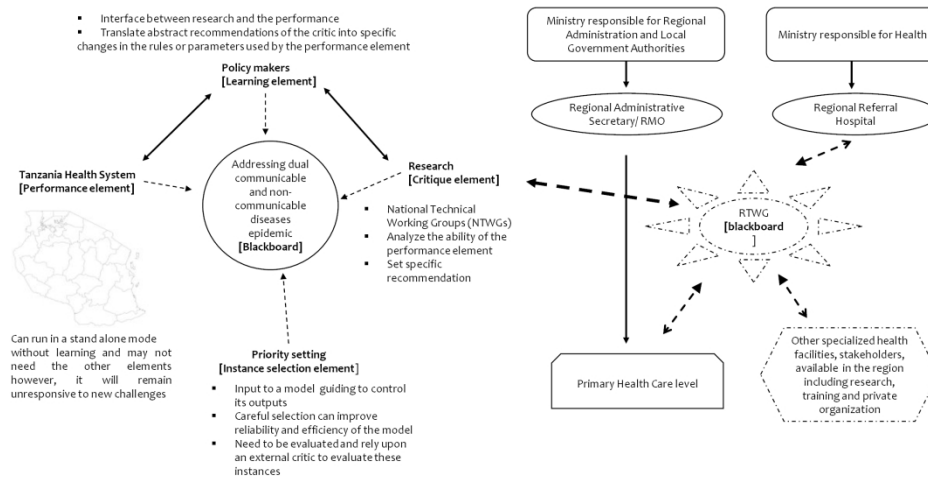

Figure 1: This model will break the siloed policy makers, health providers and researchers and gradually transform the health system into a proactive self-organizing or self-repairing system. Essential elements (Performance, Instance Selection, Critique, and Learning), if operated effectively will form an adaptive learning system. The proposed TB/DM-ADEPT Model will interconnect all interactive elements through: (a) Setting a regular single platform for policy makers, researchers and service providers on TB/DM epidemic agenda (Learning element); (b) Implementing international standards of dual TB and DM care through integrative TB/DM collaborative services that will facilitate early diagnosis while providing individualized treatment of patients with dual TB/DM disease (Performance element); (c) Conduct TB/DM applied research in implementation and health system research science to determine how to deliver best practices that will enable a people-centred health system (Critique element); and (d) Train PhD and postdoctoral fellows to answer dual TB/DM health system challenges to strengthen applied research capacity and hands-on skills to create a critical mass of the next generation of scientists able to scale up TB/DM interventions and adapt to study other communicable/ non-communicable disease intersections (Instance Selection element).

338x190mm (200 x 200 DPI)

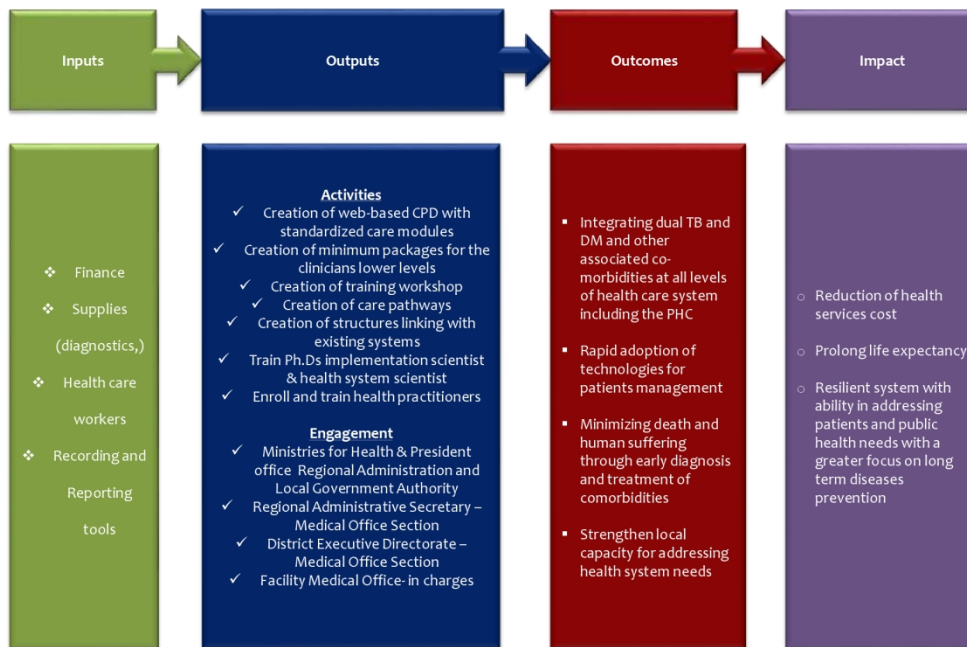

Logic framework model for measuring outcomes and impact

254x190mm (200 x 200 DPI)

1  
2  
3  
4  
5  
6  
7  
8  
9  
10  
11  
12  
13  
14  
15  
16  
17  
18  
19  
20  
21  
22  
23  
24  
25  
26  
27  
28  
29  
30  
31  
32  
33  
34  
35  
36  
37  
38  
39  
40  
41  
42  
43  
44  
45  
46  
47  
48  
49  
50  
51  
52  
53  
54  
55  
56  
57  
58  
59  
60

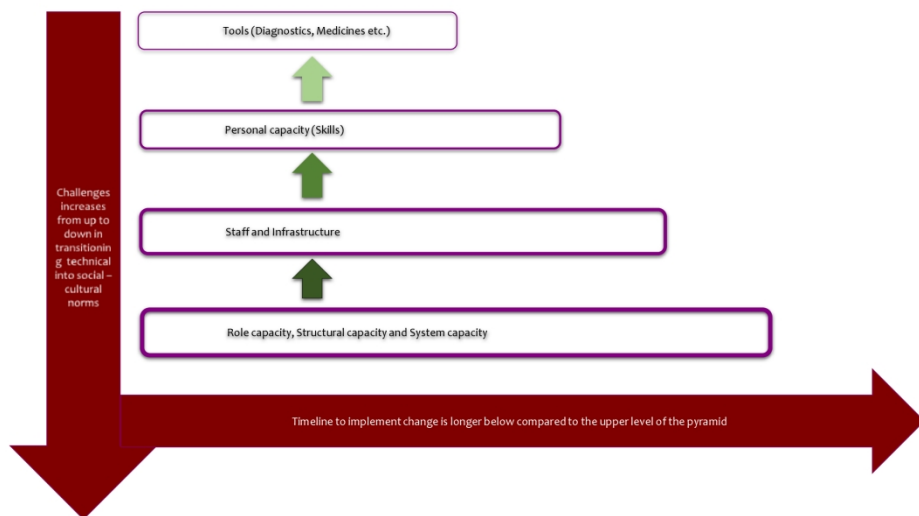

Hierarchy of needs for strengthening the health system as described by Potter & Brough<sup>34</sup>

338x190mm (200 x 200 DPI)

1  
2  
3  
4  
5  
6  
7  
8  
9  
10  
11  
12  
13  
14  
15  
16  
17  
18  
19  
20  
21  
22  
23  
24  
25  
26  
27  
28  
29  
30  
31  
32  
33  
34  
35  
36  
37  
38  
39  
40  
41  
42  
43  
44  
45  
46  
47  
48  
49  
50  
51  
52  
53  
54  
55  
56  
57  
58  
59  
60

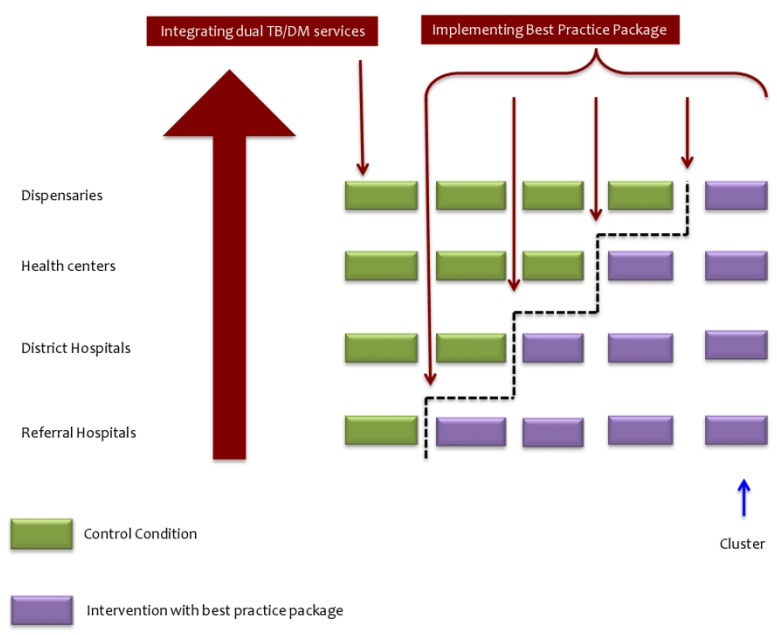

Introduction of integration of TB/DM services thereafter stepwise introduction of packages comprises of susceptibility, therapeutic drug monitoring, HbA1c for optimal TB/DM case management at all levels of health facilities

254x190mm (200 x 200 DPI)



# BMJ Open

**Protocol for establishing an Adaptive Diseases control Expert Programme in Tanzania (ADEPT) for integrating care of communicable and non-communicable diseases using tuberculosis and diabetes as a case study.**

|                                 |                                                                                                                                                                                                                                                                                                                                                                                                                                                                                                                                                                                                                                             |
|---------------------------------|---------------------------------------------------------------------------------------------------------------------------------------------------------------------------------------------------------------------------------------------------------------------------------------------------------------------------------------------------------------------------------------------------------------------------------------------------------------------------------------------------------------------------------------------------------------------------------------------------------------------------------------------|
| Journal:                        | <i>BMJ Open</i>                                                                                                                                                                                                                                                                                                                                                                                                                                                                                                                                                                                                                             |
| Manuscript ID                   | bmjopen-2020-041521.R2                                                                                                                                                                                                                                                                                                                                                                                                                                                                                                                                                                                                                      |
| Article Type:                   | Protocol                                                                                                                                                                                                                                                                                                                                                                                                                                                                                                                                                                                                                                    |
| Date Submitted by the Author:   | 04-Feb-2021                                                                                                                                                                                                                                                                                                                                                                                                                                                                                                                                                                                                                                 |
| Complete List of Authors:       | Mpagama, Stelah; Kibong'oto Infectious Diseases Hospital, Medical Ramaiya, Kaushik; Shree Hindu Mandal Hospital Lillebæk, Troels ; Statens Serum Institut, mmbaga, blandina Sumari-de Boer, Marion; Kilimanjaro Clinical Research Institute Ntinginya, Nyanda; 6. National Institute of Medical Research-Mbeya Medical Research Centre Alffenaar, Jan-Willem; Rijksuniversiteit Groningen, Heysell, Scott; University of Virginia, Division of Infectious Diseases and International Health Bygbjerg, Ib; University of Copenhagen, 1Department for International Health, Immunology and Microbiology Christensen, Dirk L.; Univ Copenhagen |
| <b>Primary Subject Heading</b>: | Global health                                                                                                                                                                                                                                                                                                                                                                                                                                                                                                                                                                                                                               |
| Secondary Subject Heading:      | Patient-centred medicine, Public health, Health services research                                                                                                                                                                                                                                                                                                                                                                                                                                                                                                                                                                           |
| Keywords:                       | Tuberculosis < INFECTIOUS DISEASES, Public health < INFECTIOUS DISEASES, Diabetes & endocrinology < INTERNAL MEDICINE                                                                                                                                                                                                                                                                                                                                                                                                                                                                                                                       |
|                                 |                                                                                                                                                                                                                                                                                                                                                                                                                                                                                                                                                                                                                                             |

SCHOLARONE™  
Manuscripts

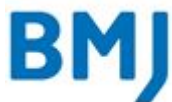

I, the Submitting Author has the right to grant and does grant on behalf of all authors of the Work (as defined in the below author licence), an exclusive licence and/or a non-exclusive licence for contributions from authors who are: i) UK Crown employees; ii) where BMJ has agreed a CC-BY licence shall apply, and/or iii) in accordance with the terms applicable for US Federal Government officers or employees acting as part of their official duties; on a worldwide, perpetual, irrevocable, royalty-free basis to BMJ Publishing Group Ltd ("BMJ") its licensees and where the relevant Journal is co-owned by BMJ to the co-owners of the Journal, to publish the Work in this journal and any other BMJ products and to exploit all rights, as set out in our [licence](#).

The Submitting Author accepts and understands that any supply made under these terms is made by BMJ to the Submitting Author unless you are acting as an employee on behalf of your employer or a postgraduate student of an affiliated institution which is paying any applicable article publishing charge ("APC") for Open Access articles. Where the Submitting Author wishes to make the Work available on an Open Access basis (and intends to pay the relevant APC), the terms of reuse of such Open Access shall be governed by a Creative Commons licence – details of these licences and which [Creative Commons](#) licence will apply to this Work are set out in our licence referred to above.

Other than as permitted in any relevant BMJ Author's Self Archiving Policies, I confirm this Work has not been accepted for publication elsewhere, is not being considered for publication elsewhere and does not duplicate material already published. I confirm all authors consent to publication of this Work and authorise the granting of this licence.

**TITLE:** Protocol for establishing an Adaptive Diseases control Expert Programme in Tanzania (ADEPT) for integrating care of communicable and non-communicable diseases using tuberculosis and diabetes as a case study.

**AUTHORS:** Stellan G Mpagama<sup>1, 2</sup>, Kaushik Ramaiya<sup>3</sup>, Troels Lillebaek<sup>4,12</sup>, Blandina T Mmbaga<sup>2,5</sup>, Marion Sumari-de Boer<sup>5</sup>, Nyanda Elias Ntinginya<sup>6</sup>, Jan-Willem Alffenaar<sup>7,8,9,10</sup>, Scott Heysell<sup>11</sup>, Ib Christian Bygbjerg<sup>12</sup>, Dirk Lund Christensen<sup>12</sup>

1. Kibong'oto Infectious Diseases Hospital, Mae Street, Lomakaa Road -Siha, Kilimanjaro
2. Kilimanjaro Christian Medical College, Sokoine Street, Moshi, Tanzania.
3. Department of internal medicine, Hindu Mandal Hospital, Dar es Salaam, Tanzania.
4. Statens Serum Institut (SSI), Copenhagen. Denmark
5. Kilimanjaro Clinical Research Institute (KCRI), PO Box 2236, Moshi, Tanzania
6. National Institute of Medical Research-Mbeya Medical Research Centre, Hospital Hill Road, Mbeya, Tanzania
7. University of Groningen, University Medical Center Groningen, Department of Clinical Pharmacy and Pharmacology, Groningen,
8. University of Sydney, Faculty of Medicine and Health, School of Pharmacy, Sydney, Australia
9. Westmead Hospital, Sydney, Australia
10. Marie Bashir Institute of Infectious Diseases and Biosecurity, University of Sydney, Sydney, Australia
11. University of Virginia, Division of Infectious Diseases and International Health, Charlottesville, Virginia, U.S.A
12. Section of Global Health, Department of Public Health, University of Copenhagen, Copenhagen, Denmark

1  
2 26 Stellah G Mpagama: smpagama@kidh.go.tz  
3  
4 27 Kaushik Ramaiya: ceo@hc.shm.or.tz  
5  
6 28 Troels Lillebaek: tll@ssi.dk  
7  
8  
9 29 Blandina T Mmbaga: b.mmbaga@kcri.ac.tz  
10  
11 30 Marion Sumari-de Boer: m.sumari@kcri.ac.tz  
12  
13  
14 31 Nyanda Elias Ntinginya: nelias@nimr-mmrc.org  
15  
16 32 Jan-Willem Alffenaar: johannes.alfenaar@sydney.edu.au  
17  
18  
19 33 Scott Heysell: skh8r@hscmail.mcc.virginia.edu  
20  
21 34 Ib Christian Bygbjerg: iby@sund.ku.dk  
22  
23  
24 35 Dirk Lund Christensen: dirklc@sund.ku.dk  
25

26 36 **Corresponding Author**

27  
28 37 Stellah G. Mpagama  
29  
30  
31 38 Kibong'oto Infectious Diseases Hospital  
32  
33 39 Mae Street, Lomakaa road  
34  
35  
36 40 Siha Kilimanjaro  
37  
38 41 Tanzania  
39  
40  
41 42 [sempagama@yahoo.com](mailto:sempagama@yahoo.com)  
42  
43 43 255754860576  
44

45  
46 44 **Keywords**

47  
48 45 Adaptive diseases intervention programme, Communicable and non-communicable dual  
49  
50 46 epidemics, tuberculosis and diabetes dual epidemic, health systems, implementation science  
51

52  
53 47 **Main manuscript words count = 3707**  
54

55 48  
56  
57  
58 49  
59  
60 50

## 51 ABSTRACT

52 **Introduction:** Most sub-Saharan African countries endure a high burden of communicable  
53 infections but also face a rise of non-communicable diseases (NCDs). Interventions targeting  
54 particular epidemics are often executed within vertical programmes. We establish an **Adaptive**  
55 **Diseases control Expert Programme in Tanzania (ADEPT)** model with three domains; step-wise  
56 training approach, integration of communicable and NCDs and a learning system and. The model  
57 aims to shift traditional vertical programmes to an adaptive diseases management approach  
58 through integrating communicable and NCDs using the tuberculosis (TB) and diabetes mellitus  
59 (DM) dual epidemic as a case study. We aim to describe the ADEPT protocol with underpinned  
60 implementation and operational research on TB/DM.

61 **Methods and analysis:** The model implement a collaborative TB and DM services protocol as  
62 endorsed by the World Health Organization in Tanzania. Evaluation of the process and outcomes  
63 will follow the logic framework. A mixed research design with both qualitative and quantitative  
64 approaches will be used in applied research action. Anticipated implementation research  
65 outcomes include at the health facilities level for organizing TB/DM services, pathways of TB/DM  
66 patients seeking care in different health facilities, factors in service delivery that need de-  
67 implementation, and the ADEPT model implementation feasibility, acceptability and fidelity.  
68 Expected operational research outcomes include additional identified patients with dual TB/DM,  
69 the prevalence of comorbidities like hypertension in TB/DM patients and final treatment  
70 outcomes of TB/DM including treatment related complications. Findings will inform the future  
71 policies and practices for integrating communicable and NCDs services.

72 **Ethics and Dissemination:** Ethical approval was granted by The National Research Health Ethical  
73 Committee (Ref-No. NIMR/HQ/R.8a/Vol.IX/2988) and the implementation endorsed by the  
74 Government authorities. Findings will be proactively disseminated through multiple mechanisms

1  
2 75 including peer-reviewed journals, and engagement with various stakeholders' example in  
3  
4 76 conferences and social media.

## 6 77 **ARTICLE SUMMARY**

### 9 78 **Strengths and limitations of this study**

- 11 79 • The ADEPT model implementation underpins pragmatic research using a mixed study  
12  
13 design to allow triangulation
- 14 80
- 15
- 16 81 • Considers service delivery at varying health facilities levels while covering urban, semi-urban  
17  
18 and rural settings
- 19 82
- 20
- 21 83 • The proposed ADEPT model outcome considers process and patient-centered outcomes
- 22  
23
- 24 84 • Lack of randomization of study settings or health facilities may introduce bias
- 25

## 26 85 **INTRODUCTION**

28  
29 86 Tanzania like other sub-Saharan African countries endures a high burden of communicable  
30  
31 87 infections including multidrug resistant pathogens; but also a concurrent rise of non-  
32  
33 communicable diseases (NCD) as populations urbanize, diets “westernize” and lifespans  
34 88  
35 lengthen [1]. The health system is largely inflexible and during various periods of disease  
36 89  
37 epidemics, the health management teams operate in crisis-mode with limited capacity to plan  
38 90  
39 for long-term disease prevention [2]. Currently in Tanzania, planned interventions for several  
40 91  
41 longstanding and socioeconomically draining infectious diseases epidemics like tuberculosis (TB)  
42 92  
43 or human immunodeficiency virus (HIV), are executed within disease specific or vertical  
44 93  
45 programmes [3]. Vertical programmes operate in silos while in reality various communicable and  
46 94  
47 NCDs and treatments can influence one another, and overlap in populations of shared genetic  
48 95  
49 backgrounds or environmental exposures, and in communities with similar socioeconomic  
50 96  
51 determinants of health. Furthermore, vertical programmes significantly constrain health care  
52 97  
53 delivery, and are rarely efficient or cost-effective, particularly when considering prevailing  
54 98  
55 regional health challenges [4]. This sobering fact has been illuminated in Tanzanian research  
56 99  
57  
58  
59  
60

1  
2 100 studies that uncovered a health system gridlock largely contributed by limited resources and  
3  
4 101 skills-training for front-line health care providers, and weak linkage to other health services with  
5  
6 102 the subsequent effect of underuse of technologies [5-10].

8  
9 103 Likewise, the prevalence of dual communicable and NCD epidemics is increasing, yet  
10  
11 104 communicable clinics are unprepared to deal with dual services [11, 12]. For instance, the  
12  
13  
14 105 prevalence of DM ranged 4 – 17 % and hypertension ranged 7 – 25 % in people leaving with HIV  
15  
16 106 attending clinics in Tanzania cities, while, in other settings within Tanzania, the prevalence of DM  
17  
18  
19 107 ranged 4 – 5% and hypertension ranged 22 – 30% [13, 14]. Likewise, the incidence of dual  
20  
21 108 diagnosed patients with TB/DM ranges from 4% of all TB patients in rural areas to 17% in urban  
22  
23  
24 109 settings. [15, 16]. Evidence has shown that TB/DM death is 5-fold higher compared to TB patients  
25  
26 110 without DM and that death primarily occurred early, in the first three months of TB treatment  
27  
28  
29 111 [15, 16]. This high and early mortality from TB/DM in Tanzania is due to both programmatic and  
30  
31 112 biological factors [17]. The TB and DM services are not linked and these separated service lines  
32  
33  
34 113 lead to delayed interventions for both diseases [18]. Biological factors contributing to poor  
35  
36 114 TB/DM treatment outcomes includes DM-related alterations in drug absorption and metabolism  
37  
38 115 resulting in sub-therapeutic anti-TB drug serum concentrations, altered inflammatory/anti-  
39  
40  
41 116 inflammatory host immune defences and worsened control of hyperglycaemia leading to  
42  
43 117 uncontrolled DM [19] [20]

45  
46 118 The existing systemic bottlenecks hinder optimal service delivery particularly in individuals with  
47  
48 119 dual communicable and NCDs, thus suggesting the urgent need for modification of models of  
49  
50  
51 120 health care delivery. We developed a model to strengthen health systems by shifting traditional  
52  
53 121 vertical programmes to a patient-centred adaptive diseases control approach through  
54  
55 122 integrating communicable and NCDs. The model intention is to integrate technologies and  
56  
57  
58 123 innovations to personalize treatment and increase impact on quality care through novel  
59  
60 124 strategies while facilitating the interruption of the cycle of transmission, and mortality in



1  
2 125 communities.  
3  
4 126 Henceforth, we describe the strategy to establish a contemporary **Adaptive Diseases control**  
5  
6  
7 127 **Expert Programme in Tanzania (ADEPT)**. The ADEPT model is likely to pioneer the systems  
8  
9 128 thinking methodology described by Swanson and colleagues to guide integrative changes in the  
10  
11  
12 129 health system [21], and it includes three interdependent domains; (i) step-wise training approach  
13  
14 130 for knowledge and skills improvement of the frontline health care providers, (ii) adaptive service  
15  
16 131 delivery through integration of communicable and NCD and (iii) continuous learning and  
17  
18  
19 132 integration of dual communicable and NCD (Figure 1).

20  
21 133 The objective of this protocol is to describe the implementation of ADEPT model using the TB  
22  
23  
24 134 and DM dual epidemic as a case study in Tanzania with underpinned applied research questions  
25  
26 135 (both operational and implementation research) to answer critical scientific questions of direct  
27  
28  
29 136 patient and public benefit. The protocol will generate evidence that will subsequently inform the  
30  
31 137 forthcoming best policies for integrating care of communicable and NCDs in the country.

### 32 33 138 **Overview of the ADEPT Model**

34  
35  
36 139 The ADEPT model has three components considered as vital to re-orient the health system to  
37  
38 140 efficiently address dual communicable and NCDs. Each component is described as follows;

- 39  
40  
41  
42 141 **I. A Step-wise Training approach: The objective is to improve knowledge, skills-training and**  
43  
44 142 **resource acquisition for the frontline health care providers to integrate communicable and**  
45  
46  
47 143 **NCDs at varying health system levels.**

48  
49  
50 144 This approach follows the “classical diffusions of innovation theory” described elsewhere [22]  
51  
52  
53 145 and organised on-job training in two clusters that will stepwise deliver a logically related set of  
54  
55 146 international standards of patients with communicable and NCDs. The first cluster consisting of  
56  
57  
58 147 mentors that train to integrate communicable and non-communicable diseases. The potential  
59  
60 148 mentors will be selected by the health managers at the respective health facilities, preferably

1  
2 149 working in either a general clinic or TB or DM clinic. This cluster will also then serve as subsequent  
3  
4 150 mentors. The initial training is through the e-learning methodology and pre-defined proceeding  
5  
6 151 criterion (score > 80% of the online training) to the next phase which is a face-to-face workshop.  
8  
9 152 The aim of the workshop is to expose individuals to acquire hands-on skills and conduct practical  
10  
11 153 exercises related to clinical services focusing on algorithms of management or nursing care and  
13  
14 154 new endorsed technologies. The second cluster will receive training and mentorship from the  
15  
16 155 first cluster. The first cluster receives package/materials to train the second cluster working at  
17  
18 156 the same level or at primary health care facilities.  
20  
21

22 157 **II. Adaptive service delivery. The objective is to integrate communicable and NCDs at varying**  
23  
24  
25 158 **health system levels**  
26

27  
28 159 Clinics delivering communicable or NCDs at varying levels of health facilities will receive training  
29  
30 160 using a step-wise model. Considerations of infection prevention control will guide a service  
31  
32 161 delivery approach while considering patient-centred recommendations. The first clinic will be  
33  
34 162 applicable to clients with TB with or without other co-morbidities. Recognizing individuals with  
35  
36 163 non-communicable lung diseases (CLDs) such as chronic obstructive pulmonary diseases  
37  
38 164 presenting with features akin of TB, a separate clinic may need to be organized. For the TB and  
39  
40 165 CLD clinics, although potentially operating separately, it is important to maintain the link of these  
41  
42 166 clinics as an important component of practical approach of lung health. The third clinic will  
43  
44 167 encompass all non-TB-non-CLD with or without other comorbidities including HIV, DM, and  
45  
46 168 Hypertension. A multimorbidity team within a health facility will facilitate mechanisms for  
47  
48 169 screening communicable and NCDs.  
49  
50  
51  
52

53  
54  
55  
56 170 **III. Learning system: The objective is to create a platform for reviewing data and information**  
57  
58  
59 171 **generated during implementation, and create a 'self-repairing' mechanism**  
60

1  
2 172 The mentors or first cluster of trainees will have regular meetings at the Regional Medical Officer  
3  
4 173 with attendance of District Medical Officers and different programme coordinators; including TB  
5  
6 174 & Leprosy, NCDs, HIV, Malaria and Neglected Tropical Diseases. The meeting will review the  
7  
8  
9 175 clinical audit and quality improvement reports from health facilities focusing on health service  
10  
11 176 delivery and identify the gaps for actions. Likewise, the coordinators will share on the expected  
12  
13  
14 177 national targets in their local context. The meeting report will be submitted to the higher  
15  
16 178 authorities responsible for health. Currently the report will be submitted to the Ministry of  
17  
18  
19 179 Health Community Development Gender Elderly and Children and the President Office Regional  
20  
21 180 Administration and Local Government Authority. The report will be included in the respective  
22  
23  
24 181 national technical working groups (TWG) for incorporation in the general provision of technical  
25  
26 182 direction and advice. The relay mechanisms from the TWG to regions will also be established.  
27  
28  
29

### 30 183 **ADEPT Model Research Questions Component**

31  
32  
33 184 The proposed research questions focus on integration of TB and DM services. The proposed  
34  
35  
36 185 questions cover the scope of implementation and operational research sciences.

#### 37 38 186 Implementation research

- 39  
40  
41 187 1. Where is the best place in the HCS system to implement (or initiate) integration of TB and  
42  
43 188 DM?
- 44  
45 189 2. What is the best approach to deliver on-job training and facilitate delivery of integration  
46  
47  
48 190 of TB and DM in a patient-centred approach?
- 49  
50 191 3. What did patients with dual TB and DM experience and what were their perspectives on  
51  
52  
53 192 services they received in the health facilities?
- 54  
55 193 4. What is/are the most effective approach/es to *de-implement* health facility practices  
56  
57  
58 194 that do not support effective integration of proposed service delivery model using TB  
59  
60 195 and DM as a case study?

- 1  
2 196 5. What is the feasibility, acceptability and fidelity of the implemented designed models on  
3  
4 197 TB/DM?  
5  
6 198 6. What are the effects of therapeutic drug monitoring on personalized dose adjustment  
7  
8  
9 199 and subsequently on treatment outcomes?  
10

#### 11 200 Operational research in TB and DM

- 12  
13  
14 201 1. How many additional dual TB and DM patients will be identified during bi-directional  
15  
16 202 screening of TB and DM services who would otherwise not have been identified?  
17  
18  
19 203 2. What are the treatment outcomes of patients with dual TB and DM with or without HIV  
20  
21 204 compared to other patients without DM?  
22

#### 23 205 **METHODS AND ANALYSIS FOR ADEPT MODEL**

24  
25  
26 206 The protocol deploys the International Union Against Tuberculosis and Lung Disease and the  
27  
28  
29 207 World Diabetes Foundation outlined Bali Initiative on TB and DM collaborative services that was  
30  
31 208 endorsed by World Health Organization (WHO) [23, 24]. The model will be evaluated using the  
32  
33  
34 209 logic framework developed by the WHO/US-Center for Diseases Control and Prevention (US-  
35  
36 210 CDC) (Figure 2) [25]. The design of input and output pillars reflect largely on the archetypical  
37  
38  
39 211 work designed by Potters and Brought in 2004 for health system strengthening [26]. This  
40  
41 212 includes a four-tier hierarchy with nine-interdependent elements as depicted in Figure 3.

42  
43 213 **Staff and Personnel Training:** The ADEPT consortium collaborates with the National Training  
44  
45  
46 214 Centres and hospitals/facilities that provide advanced/specialized care of patients for executing  
47  
48 215 the stepwise training approach on TB/DM and associated co-morbidities. Training includes  
49  
50  
51 216 modules delivered as web-based or m-Health platforms, covering different skills (for example,  
52  
53 217 clinicians and nurses) and can be updated remotely should new processes need to be  
54  
55  
56 218 introduced. Health care providers will have endless access and updated alerts to their mobile  
57  
58 219 numbers or emails prompting them to complete a new module.  
59  
60

1  
2 220 **Role, Structural and System capacity:** Mentors spawned in the step-wise training approach  
3  
4 221 form a team under the Regional Medical Officer (RMO). Together with implementing partners  
5  
6 222 or stakeholders will conduct regular review on TB/DM services. The clinical audit programme is  
7  
8  
9 223 built-in to increase accountability but also as a one of the learning system components [12].  
10  
11 224 The goal is to guide local decision but will also be communicated to the Ministries responsible  
12  
13  
14 225 for Health and Regional Administration and Local Government Authorities.

15  
16 226 **Tools:** Supplies for DM were frequently not available or inadequately stocked and these  
17  
18 including glucometers, glucostrips, HbA1c devices, therapeutic drug monitoring supplies,  
19 227 recording and reporting. These tools were funded temporarily through the Danish International  
20  
21 228 Development Agency, subsequently health facilities will take over. TB consumables, supplies and  
22  
23 229 tools were procured through conventional channels.

## 24 230 25 26 231 **METHODS AND ANALYSIS FOR TB AND DM RESEARCH**

### 27 232 **Study design**

#### 28 233 (i) **Set of Implementation research questions**

29 234 A set of implementation research questions will deploy a mixed research design, both qualitative  
30  
31 235 and quantitative approaches. A cross sectional design will be conducted for the needs  
32  
33 236 assessment to identify where to provide clinical management of dual TB/DM and exploring the  
34  
35 237 patient's perspective and experience on dual TB/DM services using in-dept interviews of patients  
36  
37 238 with TB/DM. A prospective cohort design will be deployed to identify factors hindering  
38  
39 239 appropriate integration, feasibility, acceptability and fidelity.

40  
41 240 A stepped wedged cluster non-randomized trial design will be for assessing effect of therapeutic  
42  
43 241 drug monitoring for dose adjustment and subsequent treatment outcome of patients with dual  
44  
45 242 TB/DM. Stepped-wedged methodology is a design that is preferably used when implementation  
46  
47 243 and research go hand in hand, especially with complex medical procedures this is a preferred  
48  
49 244 approach. A stepped wedge cluster randomised trial design is the most robust design that is

1  
2 245 logistically feasible whilst providing the level of evidence of efficacy and effectiveness to support  
3  
4 246 further implementation in health care[27, 28]. This design helps to minimise ethical issues related  
5  
6  
7 247 to withholding the optimized care in a traditional individual randomized trial design and can be  
8  
9 248 considered of low or negligible risk.

#### 11 12 249 **(ii) Set of operational research question**

13  
14 250 Cross sectional and prospective cohort design will be conducted through reviewing patients'  
15  
16 251 registries that receive bidirectional screening and treatment outcomes of dual TB/DM  
17  
18  
19 252 respectively.

#### 21 253 **Study area**

22  
23  
24 254 The research project will be conducted in three regions of Tanzania; Dar es Salaam, Iringa, and  
25  
26 255 Kilimanjaro. Districts that will participate include Ilala and Kigamboni for Dar es Salaam, Iringa  
27  
28  
29 256 Municipal, Kilolo and Mufindi for Iringa, and Moshi Municipal, Same and Siha for Kilimanjaro. We  
30  
31 257 selected areas to affiliate with the workplaces of the current consortium's Tanzanian expertise  
32  
33  
34 258 and to reflect representative population types. Dar es Salaam is largely a metropolitan while  
35  
36 259 Iringa and Kilimanjaro selected areas cover rural (Kilolo and Siha), semi-urban (Mufindi and  
37  
38 260 Same) and urban settings (Iringa Municipal and Moshi Municipal). According to the National TB  
39  
40  
41 261 survey of 2012, the TB prevalence is high in Dar es Salaam and in rural settings[29]. The burden  
42  
43 262 of DM is 9% in Tanzania but is more common in urban settings[30].

#### 45 46 263 **Study outline: Set of the implementation Research Objectives**

47  
48 264 At least 30 health facilities are needed for reliable and accurate results therefore each region will  
49  
50  
51 265 contribute at least 10 health facilities at various levels for integrating TB or TB/HIV and DM  
52  
53 266 services [31]. The catchment area includes one- referral hospital, three district hospitals and at  
54  
55  
56 267 least 6 health centres/dispensaries. Using the WHO service availability and readiness assessment,  
57  
58 268 the identified capacity of the health facility will guide decisions on whether the health facility will  
59  
60 269 operate as a "one-stop shop" defined as TB and DM services provided at the same time using

1  
2 270 adjacent rooms, “partial integration” defined as health care providers swaps between clinics, or  
3  
4 271 “remote integration” through cross referral of DM to TB services. Operational infection  
5  
6  
7 272 prevention policy for TB controls and equipment for monitoring DM to prevent complications  
8  
9 273 are vital for decision. Entries of TB/DM integration in TB services or TB/HIV services will be at the  
10  
11  
12 274 TB and DM clinics [32].

13  
14 275 In the step-wise training approach, the online course will have a pre- and post-courses  
15  
16 276 assessment using the standard questions. Knowledge comparison will be made pre- and post-  
17  
18  
19 277 training. During integration of dual TB/DM, patients receiving services for at least 3 months will  
20  
21 278 be invited for interview using a guide. Discussion will focus on identifying the pathway the  
22  
23  
24 279 patients have experienced or encountered of receiving dual TB/DM services. Patients will be  
25  
26 280 asked to provide suggestions on pathways and service provision.

27  
28  
29 281 Information collected from the need’s assessment and in-depth interview of participants’  
30  
31 282 pathways of care will identify practices that need to be de-implemented. Discussion with the  
32  
33  
34 283 health managers and responsible authorities will be conducted to reinforce *de*-implementation  
35  
36 284 of those practices. Pilot of clinical audit focused on de-implementing those practices will  
37  
38 285 complement the processes.

39  
40  
41 286 Health facilities effectively integrating dual TB/DM services will enter a next phase of using  
42  
43 287 therapeutic drug monitoring for personalized dose adjustment to optimize dual TB/DM patient  
44  
45  
46 288 management (Figure 4). The implementation study design will describe the outcomes of patients  
47  
48 289 with dual TB/DM tested with diagnostics comprising of susceptibility testing, anti-TB therapeutic  
49  
50  
51 290 drug monitoring, and HbA1c for monitoring the DM and guide selection and combination of both  
52  
53 291 anti-TB and anti-DM drugs. The stepped wedge trial design will be used for assessing the effect  
54  
55  
56 292 of therapeutic drug monitoring will have 3-phases: pre-enrolment phases where prior to  
57  
58 293 implementation of all facilities will serve as controls; roll-out period when health facilities cross-  
59  
60



1  
2 294 over from control to active implementing the therapeutic drug monitoring; post-rollout when all  
3  
4 295 selected health facilities will be implementing therapeutic drug monitoring.  
5  
6 296 TB/DM or TB-HIV/DM individuals will provide baseline sputum for culture and drug susceptibility  
7  
8  
9 297 testing as well as smear microscopy. Patients will also test for HbA1c and renal function test to  
10  
11 298 assess for severity of DM. Two weeks after starting anti-TB medication, blood will be collected  
12  
13  
14 299 for therapeutic drug monitoring of anti-TB drugs. Collection of blood will be through dry blood  
15  
16 300 spot and transported to the Biotechnology Laboratory/Kilimanjaro Clinical Research Institute  
17  
18  
19 301 through Expedited Mail Services. The dry blood spot collection will be processed for testing the  
20  
21 302 serum drug levels starting first with rifampicin using an assay validated according to international  
22  
23  
24 303 guidelines[33] Results will be communicated before day 21 of anti-TB treatment, and if needed  
25  
26 304 the anti-TB dosage adjustment will be made. A TDM strategy suitable for a fixed dose  
27  
28  
29 305 combination regimen will be applied. In summary, the therapeutic drug monitoring will be  
30  
31 306 performed at week 2 of TB treatment, and based on plasma concentrations results, the  
32  
33  
34 307 appropriate FDC tablets can be selected[34, 35]. Serum drug exposure that differs by at least 25%  
35  
36 308 from target concentrations will be considered as clinically relevant [36]. Therefore, those below  
37  
38  
39 309 the target will be eligible for dose adjustment. Two weeks after dose adjustment, the new drug  
40  
41 310 concentrations will be assayed and determined if having met target [34]. In the continuation  
42  
43 311 phase, the appropriate fixed drug combination of rifampicin and isoniazid can be selected, based  
44  
45  
46 312 on earlier measured drug concentrations. In addition, routine pharmaco-vigilance will  
47  
48 313 complement the safety data of this strategy. TB/DM cases will have monthly mycobacteriological  
49  
50  
51 314 monitoring for detection of microbiological treatment failure. While DM monitoring will include  
52  
53 315 the assessment of retinopathy, impaired wound healing (diabetic foot), and nephropathy [37,  
54  
55 316 38]. HbA1c and renal function tests will also be followed at month 3 and 6 to enable further anti-  
56  
57  
58 317 DM regimen adjustment.  
59  
60

1  
2 318 Key elements of the ADEPT model (step-wise training approach, integration of communicable &  
3  
4 319 NCDs and learning system) will be assessed for the coverage to estimate feasibility, acceptability  
5  
6  
7 320 of different stakeholders on various stages of the model. Adherence of different algorithms and  
8  
9 321 steps described will be assessed and estimate the fidelity.

10  
11 322 The data collection and analysis will be summarized in qualitative case record forms while  
12  
13  
14 323 quantitative data will be available in the Multi-Schema Information Capture database, which is  
15  
16 324 a customizable format current in use in Kilimanjaro, utilizing secure encryption services  
17  
18  
19 325 (www.mysql.com). Data collection, transfer, entry, validation, queries generation, audit,  
20  
21 326 archival and ownership will be detailed in specific standard operational procedures as  
22  
23  
24 327 described elsewhere[39]. Outcome measures include

- 25  
26 328 • Proportion of health facilities capable of providing dual TB/DM bidirectional screening  
27  
28  
29 329 with or without clinical management at varying levels  
30
- 31 330 • Pathway of patients' experience and acceptability of dual TB/DM services [40]  
32
- 33  
34 331 • Effect of stepwise training on integration of dual TB/DM services at varying levels  
35
- 36 332 • Systemic factors hindering optimal integration of TB/DM services at varying levels  
37
- 38  
39 333 • The ADEPT model implementation feasibility, acceptability of health care providers &  
40  
41 334 health managers and fidelity focusing on proportion of registered TB patients screened  
42  
43 335 for DM and vice versa as portrayed in Figure 2.  
44
- 45  
46 336 • Treatment outcomes of patients with TB/DM adjusted for dosages with results from  
47  
48 337 TDM compared to those without TDM  
49

50  
51 338

52  
53 339 **Study outline: Set of the Operation Research Objective**

54  
55  
56 340 People with DM, especially those with sub-optimal control as defined by HbA1c, will be screened  
57  
58 341 for active TB. The algorithms for active TB will be applied as described elsewhere[41] [42].  
59

60  
342 All people with active TB irrespective of having “classical” symptoms (polyuria, polydipsia and

polyphagia) will be screened with glucometer and interpretation of results is as follows; if the random blood/serum glucose (RBG)  $\leq 7.8$  mmol/L or fasting blood glucose (FBG)  $\leq 6.1$  mmol/L without DM symptoms, blood or serum glucose will be considered normal. If the RBG is 7.8 – 11.0 mmol/L or FBG is 6.2 – 6.9 mmol/L, this will be considered as pre-DM. When RBG is  $\geq 11$  mmol/L or FBG is  $\geq 7.0$  mmol/L this is DM[43]. To exclude patients with transient hyperglycaemia due to cytokine stimulation (false DM diagnosis), Hb1Ac will be performed in follow-up [19]. Individuals with pre-DM or DM further tested with HbA1c, interpretation of the results will be as follows; HbA1c of  $\leq 38$  mmol/mol ( $\leq 5.6\%$ );  $39 < 48$  mmol/mol ( $5.7\% < 6.5\%$ ), and  $\geq 48$  mmol/mol ( $\geq 6.5\%$ ) will be reported and considered as normal, pre-DM and DM respectively[44]. People with active TB and pre-DM will be re-evaluated in the mid-term of TB treatment and TB treatment completion to identify if the condition has resolved, progressed, or remained static; if pre-DM will have advanced to DM, patients will be treated according to the DM guideline. The TB Infection Prevention Control practice that is applicable in HIV clinics will be applied[32].

An algorithm to identify people with active TB and high potential for treatment failure, including those with TB drug resistance and other DM co-morbidities, will be identified and tabled for expert discussion of additional support mechanisms that can be mobilized. Participants will be managed according to the collaborative TB/DM services framework guideline [45].

The data collection will be done under routine patient care in clinics. The outcome measures include;

- Incremental value of bidirectional screening in diagnosis of patients with dual TB/DM
- Proportion of TB/diabetes patients with favourable outcomes (cured, or treatment complete) or unfavourable outcomes (death, lost to follow-up, treatment failure)
- Proportion of TB/DM with additional comorbidities such as hypertension, kidney dysfunction, and retinopathy

## PATIENT AND PUBLIC INVOLVEMENT

1  
2 368 Development of this protocol was informed by a series of research studies that included one  
3  
4 369 study that examined patients' experience of health services in the health facilities [9]. Findings  
5  
6  
7 370 from the described research objectives will be shared with patients' organizations for further  
8  
9 371 refinement before subsequently contributing in shaping the agenda of effective integration of  
10  
11  
12 372 communicable and non-communicable diseases for policy makers.

### 13 14 373 **ETHICS AND DISSEMINATION**

15  
16 374 This protocol has been approved at the local health research committee serving Kibong'oto  
17  
18  
19 375 Infectious Diseases Hospital and National Health Research Committee with reference numbers  
20  
21 376 KNCHREC003 and NIMR/HQ/R.8a/Vol.IX/2988, respectively. Furthermore, the Ministries of  
22  
23  
24 377 Health and Regional Administrative & Local Government Authority have endorsed  
25  
26 378 implementation of this protocol.

### 27 28 29 379 **AUTHOR CONTRIBUTIONS**

30  
31 380 SGM, DLC, KR and ICB conceptualized and designed the model and proposal. TL, SH, JWA and  
32  
33  
34 381 MSB contributed in the design of the concept particularly in TB/DM research component. DLC  
35  
36 382 obtained the funding for the ADEPT project from the Ministry of Foreign Affairs of Denmark.  
37  
38  
39 383 SGM lead the implementation of the protocol in Tanzania while KR, and MSB lead  
40  
41 384 implementation of the stepwise model. NEN co-lead the implementation in Iringa. BTM co-lead  
42  
43 385 implementation of the TDM in Tanzania together with SH and JWA. All authors provided  
44  
45  
46 386 technical inputs in the proposal. SGM wrote the manuscript with input from all the authors. All  
47  
48 387 authors have approved the final version and agreed to be accountable for all aspects of the work  
49  
50  
51 388 related to accuracy and integrity.

### 52 53 389 **FUNDING STATEMENT**

54  
55 390 This study is funded by the Danish Ministry of Foreign Affairs (DFC File No. 17-03-KU).

### 56 57 58 391 **DATA STATEMENT**

59  
60

1  
2 392 The data sets that will be generated and analysed during the conduct of the study will be made  
3  
4 393 available according to the available laws and regulations  
5  
6  
7  
8  
9  
10  
11  
12  
13  
14  
15  
16  
17  
18  
19  
20  
21  
22  
23  
24  
25  
26  
27  
28  
29  
30  
31  
32  
33  
34  
35  
36  
37  
38  
39  
40  
41  
42  
43  
44  
45  
46  
47  
48  
49  
50  
51  
52  
53  
54  
55  
56  
57  
58  
59  
60

For peer review only

1  
2 394 **ACKNOWLEDGEMENT**

3  
4 395 The authors thank Professor Flemming Konradsen, University of Copenhagen, Denmark for his  
5  
6 396 valuable comments on the research study

8  
9 397 **FIGURES LEGEND**

10  
11 398 Figure 1: The ADEPT model includes three essential domains. The performance domain is  
12  
13 identified as integration of communicable and non-communicable diseases. For effective  
14 399 delivery of adaptive service, the performance domain requires support by the second and third  
15  
16 400 domains called a stepwise training approach and learning systems. The stepwise training  
17  
18 approach will ensure the frontline health care providers acquire knowledge and skills necessary  
19 401 for integrating communicable and NCDs. The learning system domain should be continuously  
20  
21 402 operating by including processes like implementation research and clinical audits which serves  
22  
23 as a system lens to continuously inform the operation of the performance domain. Information  
24 403 flow including clinical guidelines and new practices will go through the stepwise training  
25  
26 404 approach. The three functioning domains create an adaptive service delivery model for the  
27  
28 health system.  
29 405

30  
31 406 Figure 2: Logic framework model for measuring outcomes and impact

32  
33 407 Figure 3: Hierarchy of needs for strengthening the health system as described by Potter &  
34  
35 Brough<sup>34</sup>

36 408 Figure 4: Introduction of integration of TB/DM services thereafter stepwise introduction of  
37  
38 packages comprises of susceptibility, therapeutic drug monitoring, HbA1c for optimal TB/DM  
39  
40 case management at all levels of health facilities  
41 410  
42  
43 411  
44  
45 412  
46  
47  
48 413  
49  
50 414  
51  
52  
53 415

54  
55 416 **COMPETING INTEREST STATEMENT:**

56  
57 417 None declared.

58  
59  
60 418

1  
2 419 **REFERENCES**  
3

- 4 420 1. Institute for Health Metrics and Evaluation (IHME). Global Burden of Diseases (GBD)  
5 421 Profile;Tanzania, 2010.
- 6 422 2. Commission on Global Health Risk Framework for the Future (GHRF). Accelerating  
7 423 Research and Development to Counter the Threat of Infectious Diseases. The Neglected  
8 424 Dimension of Global Security: A Framework to Counter Infectious Disease Crises.  
9 425 Washington (DC)2016
- 10 426 3. Ministry of Health and Social Welfare of Tanzania. **Health Sector Strategic Plan IV (2015-**  
11 427 **2020)**. In.; 2015.
- 12 428 4. Bryan L, Conway M, Keesmaat T, McKenna S, Richardson B: **Strengthening sub-Saharan**  
13 429 **Africa's health systems: A practical approach | McKinsey & Company.** *Health Systems &*  
14 430 *Services* 2010:1-11.
- 15 431 5. Mpagama SG, Heysell SK, Ndusilo ND, Kumburu HH, Lekule IA, Kisonga RM, Gratz J, Boeree  
16 432 MJ, Houpt ER, Kibiki GS: **Diagnosis and interim treatment outcomes from the first cohort**  
17 433 **of multidrug-resistant tuberculosis patients in Tanzania.** *PLoS One* 2013, **8**(5):e62034.
- 18 434 6. Liyoyo A, Heysell SK, Kisonga RM, Lyimo JJ, Mleoh LJ, Mutayoba BK, Lekule IA, Mmbaga BT,  
19 435 Kibiki GS, Mpagama SG: **Gridlock from diagnosis to treatment of Multidrug-Resistant**  
20 436 **Tuberculosis (MDR-TB) in Tanzania: Illuminating Potential Factors for Possible**  
21 437 **Intervention.** *East African Health Research Journal* 2017, **1**(1).
- 22 438 7. Mpagama SG, Mangi E, Mbelele PM, Chongolo AM, Kibiki GS, Heysell SK: **Gridlock from**  
23 439 **diagnosis to treatment of multidrug resistant tuberculosis (MDR-TB) in Tanzania: Patients**  
24 440 **perspectives from the focus group discussion.** *bioRxiv pre print* 2018, doi:  
25 441 <http://dx.doi.org/10.1101/402594>.
- 26 442 8. Mpagama SG, Mbelele PM, Chongolo AM, Lekule IA, Lyimo JJ, Kibiki GS, Heysell SK:  
27 443 **Gridlock from diagnosis to treatment of multidrug-resistant tuberculosis in Tanzania: low**  
28 444 **accessibility of molecular diagnostic services and lack of healthcare worker**  
29 445 **empowerment in 28 districts of 5 high burden TB regions with mixed methods**  
30 446 **evaluation.** *BMC Public Health* 2019, **19**(1).
- 31 447 9. Mpagama SG, Ezekiel MJ, Mbelele PM, Chongolo AM, Kibiki GS, de Guex KP, Heysell SK:  
32 448 **Gridlock from diagnosis to treatment of multidrug resistant tuberculosis (MDR-TB) in**  
33 449 **Tanzania: patients' perspectives from a focus group discussion.** *BMC Public Health* 2020,  
34 450 **20**(1):1667.
- 35 451 10. Harries AD, Murray MB, Jeon CY, Ottmani SE, Lonnoth K, Barreto ML, Billo N, Brostrom R,  
36 452 Bygbjerg IC, Fisher-Hoch S *et al*: **Defining the research agenda to reduce the joint burden**  
37 453 **of disease from diabetes mellitus and tuberculosis.** *Trop Med Int Health* 2010, **15**(6):659-  
38 454 663.
- 39 455 11. Bintabara D, Ngajilo D: **Readiness of health facilities for the outpatient management of**  
40 456 **non-communicable diseases in a low-resource setting: an example from a facility-based**  
41 457 **cross-sectional survey in Tanzania.** *BMJ Open* 2020, **10**(11):e040908.
- 42 458 12. Shayo FK, Shayo SC: **Availability and readiness of diabetes health facilities to manage**  
43 459 **tuberculosis in Tanzania: a path towards integrating tuberculosis-diabetes services in a**  
44 460 **high burden setting?** *BMC Public Health* 2019, **19**(1):1104.
- 45 461 13. Kato I, Tumaini B, Pallangyo K: **Prevalence of non-communicable diseases among**  
46 462 **individuals with HIV infection by antiretroviral therapy status in Dar es Salaam, Tanzania.**  
47 463 *PLoS One* 2020, **15**(7):e0235542.
- 48 464 14. Kagaruki GB, Mayige MT, Ngadaya ES, Kimaro GD, Kalinga AK, Kilale AM, Kahwa AM,  
49 465 Materu GS, Mfinanga SG: **Magnitude and risk factors of non-communicable diseases**  
50 466 **among people living with HIV in Tanzania: a cross sectional study from Mbeya and Dar es**  
51 467 **Salaam regions.** *BMC Public Health* 2014, **14**:904.



- 1  
2 468 15. Sariko ML, Mpagama SG, Gratz J, Kisonga R, Saidi Q, Kibiki GS, Heysell SK: **Glycated hemoglobin screening identifies patients admitted for retreatment of tuberculosis at risk for diabetes in Tanzania.** *J Infect Dev Ctries* 2016, **10**(4):423-426.
- 3 469  
4 470  
5 471 16. Faurholt-Jepsen D, Range N, PrayGod G, Jeremiah K, Faurholt-Jepsen M, Aabye MG, Chungalucha J, Christensen DL, Grewal HM, Martinussen T *et al*: **Diabetes is a strong predictor of mortality during tuberculosis treatment: a prospective cohort study among tuberculosis patients from Mwanza, Tanzania.** *Trop Med Int Health* 2013, **18**(7):822-829.
- 6 472  
7 473  
8 474  
9 475 17. Workneh MH, Bjune AG, Yimer SA: **Diabetes mellitus is associated with increased mortality during tuberculosis treatment: a prospective cohort study among tuberculosis patients in South-Eastern Amahra Region, Ethiopia.** *Infectious Diseases of Poverty* 2016, **5**(22):10.
- 10 476  
11 477  
12 478  
13 479 18. Harries AD, Kumar AMV, Satyanarayana S, Lin Y, Zachariah R, Lonroth K, Kapur A: **Addressing diabetes mellitus as part of the strategy for ending TB.** *Trans R Soc Trop Med Hyg* 2016, **110**:173-179.
- 14 480  
15 481  
16 482 19. Aftab H, Christensen DL, Ambreen A, Jamil M, Garred P, Petersen JH, Nielsen SD, Bygbjerg IC: **Tuberculosis-Related Diabetes: Is It Reversible after Complete Treatment?** *Am J Trop Med Hyg* 2017, **97**(4):1099-1102.
- 17 483  
18 484  
19 485 20. Heysell SK, Moore JL, Keller SJ, Houpt ER: **Therapeutic drug monitoring for slow response to tuberculosis treatment in a state control program, Virginia, USA.** *Emerg Infect Dis* 2010, **16**(10):1546-1553.
- 20 486  
21 487  
22 488 21. Swanson RC, Cattaneo A, Bradley E, Chunharas S, Atun R, Abbas KM, Katsaliaki K, Mustafee N, Mason Meier B, Best A: **Rethinking health systems strengthening: key systems thinking tools and strategies for transformational change.** *Health Policy Plan* 2012, **27** Suppl 4:iv54-61.
- 23 489  
24 490  
25 491 22. Dearing JW: **Applying Diffusion of Innovation Theory to Intervention Development.** *Res Soc Work Pract* 2009, **19**(5):503-518.
- 26 492  
27 493  
28 494 23. Bali: **Bali Declaration on the Looming TB-Diabetes Co-epidemic.** In: *Stopping a looming Co-epidemic: A global Summit on Diabetes and Tuberculosis: 2-3 November 2015; Bali-Indonesia; 2-3 November 2015.*
- 29 495  
30 496  
31 497 24. Kapur A, Harries AD, Lönnroth K, Wilson P, Sulistyowati LS: **Diabetes and tuberculosis co-epidemic: the Bali Declaration.** *The Lancet Diabetes & Endocrinology* 2016, **4**(1):8-10.
- 32 498  
33 499  
34 500 25. De-Regil LM, Pena-Rosas JP, Flores-Ayala R, del Socorro Jefferds ME: **Development and use of the generic WHO/CDC logic model for vitamin and mineral interventions in public health programmes.** *Public Health Nutr* 2014, **17**(3):634-639.
- 35 501  
36 502  
37 503 26. Potter C, Brough R: **Systemic capacity building: a hierarchy of needs.** *Health Policy Plan* 2004, **19**(5):336-345.
- 38 504  
39 505  
40 506 27. Martson AG, Sturkenboom MGG, Stojanova J, Cattaneo D, Hope W, Marriott D, Patanwala AE, Peloquin CA, Wicha SG, van der Werf TS *et al*: **How to design a study to evaluate therapeutic drug monitoring in infectious diseases?** *Clin Microbiol Infect* 2020, **26**(8):1008-1016.
- 41 507  
42 508  
43 509 28. Hemming K, Haines TP, Chilton PJ, Girling AJ, Lilford RJ: **The stepped wedge cluster randomised trial: rationale, design, analysis, and reporting.** *BMJ* 2015, **350**:h391.
- 44 510  
45 511  
46 512 29. Senkoro M, Mfinanga S, Egwaga S, Mtandu R, Kamara DV, Basra D, Fundikira L, Kahwa A, Shirima R, Range N *et al*: **Prevalence of pulmonary tuberculosis in adult population of Tanzania: a national survey, 2012.** *Int J Tuberc Lung Dis* 2016, **20**(8):1014-1021.
- 47 513  
48 514  
49 515 30. MoH: **Tanzania NCD Prevention and Control Program. Guidance on provision of NCD and mental health services in the context of COVID-19 outbreak in Tanzania.** 2020.
- 50 516  
51 517  
52 518 31. WHO: **How to investigate drug use in health facilities: Selected drug use indicators.** In: *Action Programme on Essential Drugs.* vol. WHO/DAP/93.1; 1993.

- 1  
2 517 32. Riza AL, Pearson F, Ugarte-Gil C, Alisjahbana B, van de Vijver S, Panduru NM, Hill PC,  
3 518 Ruslami R, Moore D, Aarnoutse R *et al*: **Clinical management of concurrent diabetes and**  
4 519 **tuberculosis and the implications for patient services.** *The Lancet Diabetes &*  
5 520 *Endocrinology* 2014, **2**(9):740-753.
- 6 521 33. Capiou S, Veenhof H, Koster RA, Bergqvist Y, Boettcher M, Halmingh O, Keevil BG, Koch  
8 522 BCP, Linden R, Pistos C *et al*: **Official International Association for Therapeutic Drug**  
9 523 **Monitoring and Clinical Toxicology Guideline.** *Therapeutic Drug Monitoring* 2019,  
10 524 **41**(4):409-430.
- 11 525 34. van der Burgt EP, Sturkenboom MG, Bolhuis MS, Akkerman OW, Kosterink JG, de Lange  
12 526 WC, Cobelens FG, van der Werf TS, Alffenaar JW: **End TB with precision treatment!** *Eur*  
14 527 *Respir J* 2016, **47**(2):680-682.
- 15 528 35. Zuur MA, Akkerman OW, Davies Forsman L, Hu Y, Zheng R, Bruchfeld J, Tiberi S, Migliori  
16 529 GB, Alffenaar JC: **Fixed-dose combination and therapeutic drug monitoring in**  
17 530 **tuberculosis: friend or foe?** *Eur Respir J* 2016, **48**(4):1230-1233.
- 19 531 36. Alffenaar JC, Gumbo T, Dooley KE, Peloquin CA, McIlleron H, Zagorski A, Cirillo DM, Heysell  
20 532 SK, Silva DR, Migliori GB: **Integrating Pharmacokinetics and Pharmacodynamics in**  
21 533 **Operational Research to End Tuberculosis.** *Clin Infect Dis* 2020, **70**(8):1774-1780.
- 22 534 37. Prada-Medina CA, Fukutani KF, Pavan Kumar N, Gil-Santana L, Babu S, Lichtenstein F, West  
23 535 K, Sivakumar S, Menon PA, Viswanathan V *et al*: **Systems Immunology of Diabetes-**  
25 536 **Tuberculosis Comorbidity Reveals Signatures of Disease Complications.** *Sci Rep* 2017,  
26 537 **7**(1):1999.
- 27 538 38. Kumar NP, Moideen K, Sivakumar S, Menon PA, Viswanathan V, Kornfeld H, Babu S:  
28 539 **Tuberculosis-diabetes co-morbidity is characterized by heightened systemic levels of**  
30 540 **circulating angiogenic factors.** *J Infect* 2017, **74**(1):10-21.
- 31 541 39. Martin DL, Hoff JL, Gard RA, Gregosky RJ, Jones HW, Kirkwood CA, Morris DG, Shinsato TE,  
32 542 Willott-Moore CL: **Data collection, processing, validation, and verification.** *Health Phys*  
33 543 2008, **95**(1):36-46.
- 34 544 40. Hammarberg K, Kirkman M, de Lacey S: **Qualitative research methods: when to use them**  
36 545 **and how to judge them.** *Hum Reprod* 2016, **31**(3):498-501.
- 37 546 41. Mave V, Nimkar S, Prasad H, Kadam D, Meshram S, Lokhande R, Gupte N, Jain D, Gupta A,  
38 547 Golub JE: **Tuberculosis screening among persons with diabetes mellitus in Pune, India.**  
39 548 *BMC Infect Dis* 2017, **17**(1):388.
- 41 549 42. Byashalira K, Mbelele P, Semvua H, Chilongola J, Semvua S, Liyoyo A, Mmbaga B, Mfinanga  
42 550 S, Moore C, Heysell S *et al*: **Clinical outcomes of new algorithm for diagnosis and**  
43 551 **treatment of Tuberculosis sepsis in HIV patients.** *International Journal of*  
44 552 *Mycobacteriology* 2019, **8**(4).
- 45 553 43. MoH: **THE UNITED REPUBLIC OF TANZANIA:Ministry of Health, Community Development,**  
47 554 **Gender, Elderly and Children:National Guidelines for Collaborative Care and Control of**  
48 555 **Tuberculosis and Diabetes.** 2016.
- 49 556 44. van Crevel R, Koesoemadinata R, Hill PC, Harries AD: **Clinical management of combined**  
50 557 **tuberculosis and diabetes.** *Int J Tuberc Lung Dis* 2018, **22**(12):1404-1410.
- 51 558 45. WHO: **Collaborative Framework for Care and Control of Tuberculosis and Diabetes** In.  
53 559 Edited by Stop TB Department and Department of Chronic Diseases and Health Promotion  
54 560 WHO, Geneva, Switzerland and The International Union Against Tuberculosis and Lung  
55 561 Diseases Paris France; 2011.
- 56 562  
57 562  
58  
59 563  
60

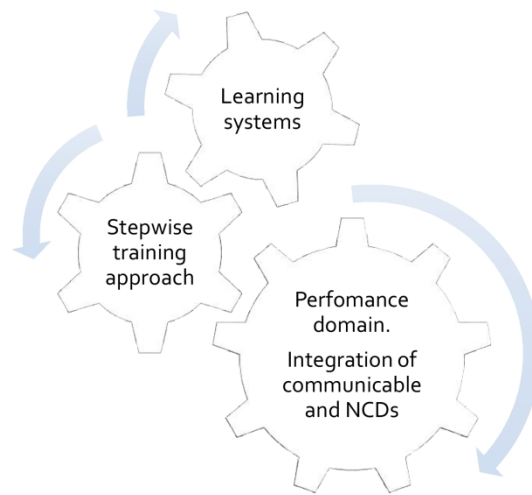

Figure 1: The ADEPT model includes three essential domains. The performance domain is identified as integration of communicable and non-communicable diseases. For effective delivery of adaptive service, the performance domain requires support by the second and third domains called a stepwise training approach and learning systems. The stepwise training approach will ensure the frontline health care providers acquire knowledge and skills necessary for integrating communicable and NCDs. The learning system domain should be continuously operating by including processes like implementation research and clinical audits which serves as a system lens to continuously inform the operation of the performance domain. Information flow including clinical guidelines and new practices will go through the stepwise training approach. The three functioning domains create an adaptive service delivery model for the health system.

338x190mm (200 x 200 DPI)



Logic framework model for measuring outcomes and impact

254x190mm (200 x 200 DPI)

1  
2  
3  
4  
5  
6  
7  
8  
9  
10  
11  
12  
13  
14  
15  
16  
17  
18  
19  
20  
21  
22  
23  
24  
25  
26  
27  
28  
29  
30  
31  
32  
33  
34  
35  
36  
37  
38  
39  
40  
41  
42  
43  
44  
45  
46  
47  
48  
49  
50  
51  
52  
53  
54  
55  
56  
57  
58  
59  
60

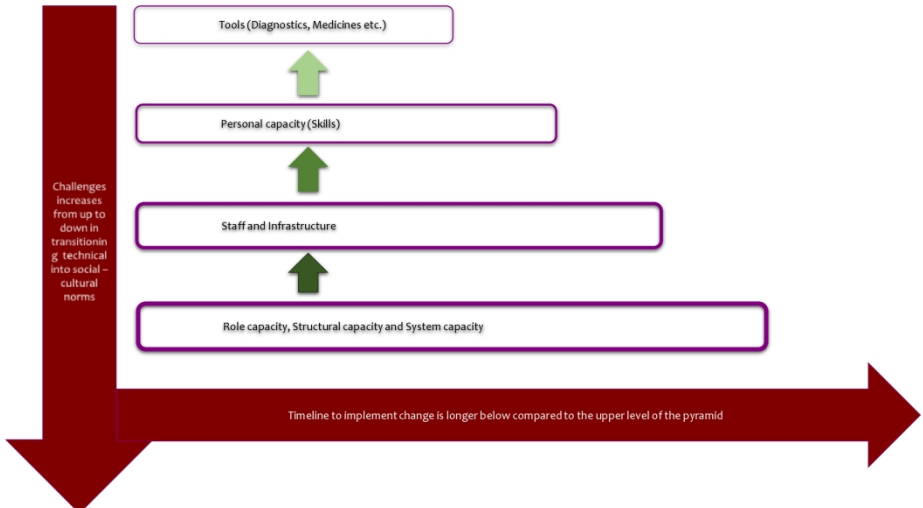

Hierarchy of needs for strengthening the health system as described by Potter & Brough<sup>34</sup>

338x190mm (200 x 200 DPI)

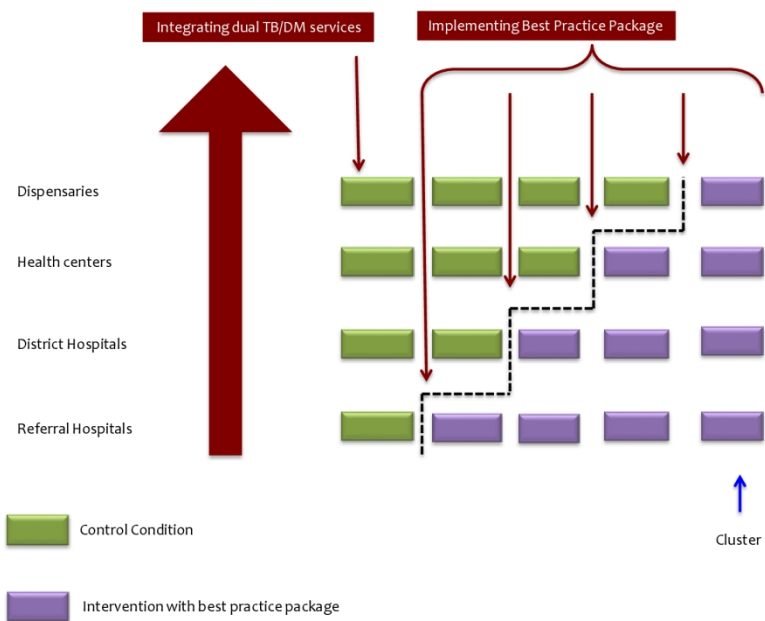

Introduction of integration of TB/DM services thereafter stepwise introduction of packages comprises of susceptibility, therapeutic drug monitoring, HbA1c for optimal TB/DM case management at all levels of health facilities

254x190mm (200 x 200 DPI)
